# Supplementary material for: Effects of the commensal microbiota on spleen and mesenteric lymph node immune function: investigation in a germ-free piglet model
Source: Front Microbiol. 2024 Jun 12;15:1398631. doi: 10.3389/fmicb.2024.1398631 (PMC11201156; doi:10.3389/fmicb.2024.1398631)
Supplement: Supplementary file 3 [file Table_3.XLSX]

## Sheet: GF_Spleen-vs-SPF_Spleen
id	GF1_Spleen	GF2_Spleen	GF3_Spleen	SPF1_Spleen	SPF2_Spleen	SPF3_Spleen	GF1_Spleen_CPM	GF2_Spleen_CPM	GF3_Spleen_CPM	SPF1_Spleen_CPM	SPF2_Spleen_CPM	SPF3_Spleen_CPM	GF_Spleen_mean	SPF_Spleen_mean	log2(fc)	PValue	FDR
ENSSSCG00000029414	2577	7275	4253	269	166	367	54.3	166.44	65.64	4.64	3.03	6.61	95.46	4.76	-4.3259	7.01403e-22	8.71774e-18
ENSSSCG00000025005	617	439	843	2041	1795	2307	13	10.04	13.01	35.23	32.72	41.53	12.0167	36.4933	1.6026	5.26045e-16	3.2691e-12
ENSSSCG00000010523	513	549	892	208	185	226	10.81	12.56	13.77	3.59	3.37	4.07	12.38	3.67667	-1.7515	1.91156e-15	7.9196e-12
ENSSSCG00000037430	2098	2278	3924	9273	11592	14784	44.2	52.12	60.56	160.05	211.31	266.12	52.2933	212.493	2.0227	1.1824e-14	3.67402e-11
ENSSSCG00000006455	22268	21131	50078	123549	95918	139983	469.18	483.44	772.91	2132.41	1748.48	2519.73	575.177	2133.54	1.8912	2.23388e-14	5.55298e-11
ENSSSCG00000026318	498	177	385	68	33	35	10.49	4.05	5.94	1.17	0.6	0.63	6.82667	0.8	-3.0931	1.10719e-12	2.29354e-09
ENSSSCG00000035226	15	0	7	262	246	197	0.32	0	0.11	4.52	4.48	3.55	0.143333	4.18333	4.8672	1.52575e-12	2.70908e-09
ENSSSCG00000047232	102	81	105	531	367	425	2.15	1.85	1.62	9.16	6.69	7.65	1.87333	7.83333	2.064	2.03603e-11	2.88147e-08
ENSSSCG00000006578	2360	1964	2280	898	921	686	49.72	44.93	35.19	15.5	16.79	12.35	43.28	14.88	-1.5403	2.08651e-11	2.88147e-08
ENSSSCG00000032902	466	361	745	169	110	65	9.82	8.26	11.5	2.92	2.01	1.17	9.86	2.03333	-2.2777	2.38357e-11	2.96254e-08
ENSSSCG00000013100	2138	2263	4388	1146	1278	880	45.05	51.77	67.72	19.78	23.3	15.84	54.8467	19.64	-1.4816	3.59998e-11	4.06765e-08
ENSSSCG00000035736	1131	1240	3287	391	582	471	23.83	28.37	50.73	6.75	10.61	8.48	34.31	8.61333	-1.994	4.77192e-11	4.94252e-08
ENSSSCG00000037142	6893	9253	6225	2502	1296	1810	145.23	211.69	96.08	43.18	23.62	32.58	151	33.1267	-2.1885	7.53228e-11	7.20144e-08
ENSSSCG00000002414	4623	2654	7236	12703	18349	20175	97.4	60.72	111.68	219.25	334.48	363.15	89.9333	305.627	1.7648	2.47883e-10	2.05396e-07
ENSSSCG00000038507	30273	33482	24770	10732	6394	9674	637.84	766.01	382.3	185.23	116.56	174.13	595.383	158.64	-1.9081	2.77896e-10	2.15873e-07
ENSSSCG00000036569	2511	3007	3150	1156	1229	1178	52.91	68.8	48.62	19.95	22.4	21.2	56.7767	21.1833	-1.4224	3.76357e-10	2.75161e-07
ENSSSCG00000029200	419	403	778	1546	1319	1346	8.83	9.22	12.01	26.68	24.04	24.23	10.02	24.9833	1.3181	5.55608e-10	3.83647e-07
ENSSSCG00000036883	791	794	908	401	284	302	16.67	18.17	14.01	6.92	5.18	5.44	16.2833	5.84667	-1.4777	6.06804e-10	3.96945e-07
ENSSSCG00000015880	317	207	546	1064	1006	1020	6.68	4.74	8.43	18.36	18.34	18.36	6.61667	18.3533	1.4719	8.37661e-10	5.20564e-07
ENSSSCG00000011811	73	55	247	545	887	907	1.54	1.26	3.81	9.41	16.17	16.33	2.20333	13.97	2.6646	1.20144e-09	7.11082e-07
ENSSSCG00000000838	419	378	893	1617	1624	1539	8.83	8.65	13.78	27.91	29.6	27.7	10.42	28.4033	1.4467	1.46971e-09	8.30319e-07
ENSSSCG00000006081	35283	36933	37354	18952	12529	15031	743.4	844.96	576.52	327.1	228.39	270.56	721.627	275.35	-1.39	1.59643e-09	8.62695e-07
ENSSSCG00000009661	220	151	395	738	815	1015	4.64	3.45	6.1	12.74	14.86	18.27	4.73	15.29	1.6927	1.86397e-09	9.65304e-07
ENSSSCG00000003261	2413	3169	2655	1130	809	995	50.84	72.5	40.98	19.5	14.75	17.91	54.7733	17.3867	-1.6555	2.05742e-09	1.02287e-06
ENSSSCG00000020817	73185	92463	90741	43063	31217	30767	1541.97	2115.4	1400.5	743.25	569.05	553.81	1685.96	622.037	-1.4385	2.47043e-09	1.1405e-06
ENSSSCG00000031838	112069	125067	111960	56116	39516	45008	2361.24	2861.32	1727.99	968.54	720.33	810.15	2316.85	833.007	-1.4758	2.47756e-09	1.1405e-06
ENSSSCG00000039956	11	20	36	169	238	154	0.23	0.46	0.56	2.92	4.34	2.77	0.416667	3.34333	3.0043	2.71761e-09	1.20633e-06
ENSSSCG00000025687	537	358	679	261	227	264	11.31	8.19	10.48	4.5	4.14	4.75	9.99333	4.46333	-1.1628	4.88143e-09	2.02238e-06
ENSSSCG00000016331	3716	3768	4781	2494	1930	2083	78.29	86.21	73.79	43.05	35.18	37.49	79.43	38.5733	-1.0421	6.09835e-09	2.38561e-06
ENSSSCG00000017705	15492	11708	24508	11049	7503	6967	326.41	267.86	378.26	190.7	136.77	125.41	324.177	150.96	-1.1026	6.14204e-09	2.38561e-06
ENSSSCG00000023903	4291	5938	3901	1698	1385	1529	90.41	135.85	60.21	29.31	25.25	27.52	95.49	27.36	-1.8033	6.49356e-09	2.44571e-06
ENSSSCG00000014232	814	347	1110	3232	2009	3119	17.15	7.94	17.13	55.78	36.62	56.14	14.0733	49.5133	1.8149	6.93085e-09	2.53363e-06
ENSSSCG00000033326	78492	108584	64927	33286	19083	22420	1653.79	2484.22	1002.09	574.5	347.86	403.57	1713.37	441.977	-1.9548	9.99568e-09	3.54961e-06
ENSSSCG00000033641	299	266	326	972	850	846	6.3	6.09	5.03	16.78	15.49	15.23	5.80667	15.8333	1.4472	1.10208e-08	3.80493e-06
ENSSSCG00000035432	929	658	1297	2086	2045	2087	19.57	15.05	20.02	36	37.28	37.57	18.2133	36.95	1.0206	1.19702e-08	4.02102e-06
ENSSSCG00000050398	128	59	557	1460	2383	1749	2.7	1.35	8.6	25.2	43.44	31.48	4.21667	33.3733	2.9845	1.28345e-08	4.1979e-06
ENSSSCG00000012572	625	411	705	1979	1260	1935	13.17	9.4	10.88	34.16	22.97	34.83	11.15	30.6533	1.459	1.51707e-08	4.83479e-06
ENSSSCG00000003278	1033	959	1018	3088	3100	3044	21.76	21.94	15.71	53.3	56.51	54.79	19.8033	54.8667	1.4702	1.65576e-08	5.14485e-06
ENSSSCG00000028802	160	101	198	466	586	453	3.37	2.31	3.06	8.04	10.68	8.15	2.91333	8.95667	1.6203	1.93601e-08	5.86894e-06
ENSSSCG00000028691	1068	676	1470	2753	2443	2251	22.5	15.47	22.69	47.52	44.53	40.52	20.22	44.19	1.1279	2.44872e-08	7.24646e-06
ENSSSCG00000023331	3615	5109	4411	1832	1631	1838	76.17	116.89	68.08	31.62	29.73	33.08	87.0467	31.4767	-1.4675	2.54253e-08	7.3491e-06
ENSSSCG00000021084	2003	2808	2317	1037	871	798	42.2	64.24	35.76	17.9	15.88	14.36	47.4	16.0467	-1.5626	2.62831e-08	7.42437e-06
ENSSSCG00000037582	327	161	853	1836	1715	2322	6.89	3.68	13.17	31.69	31.26	41.8	7.91333	34.9167	2.1416	3.03692e-08	8.38799e-06
ENSSSCG00000017971	1638	2268	1741	831	502	610	34.51	51.89	26.87	14.34	9.15	10.98	37.7567	11.49	-1.7164	3.13841e-08	8.47986e-06
ENSSSCG00000017239	26971	30144	21580	11550	6600	9638	568.27	689.64	333.07	199.35	120.31	173.49	530.327	164.383	-1.6898	3.55616e-08	9.26445e-06
ENSSSCG00000013597	38099	45832	37701	20612	12837	14322	802.73	1048.56	581.88	355.75	234	257.8	811.057	282.517	-1.5215	3.57787e-08	9.26445e-06
ENSSSCG00000040273	43533	54977	42086	22493	15467	16877	917.22	1257.78	649.56	388.22	281.95	303.79	941.52	324.653	-1.5361	4.34677e-08	1.10257e-05
ENSSSCG00000040183	85	64	232	508	485	521	1.79	1.46	3.58	8.77	8.84	9.38	2.27667	8.99667	1.9825	4.66286e-08	1.15909e-05
ENSSSCG00000039522	377	533	910	2169	1599	2034	7.94	12.19	14.04	37.44	29.15	36.61	11.39	34.4	1.5946	4.77306e-08	1.16322e-05
ENSSSCG00000037792	3139	5755	3383	1396	1185	1227	66.14	131.66	52.21	24.09	21.6	22.09	83.3367	22.5933	-1.8831	5.65665e-08	1.35205e-05
ENSSSCG00000040731	603	442	771	1481	1515	1264	12.7	10.11	11.9	25.56	27.62	22.75	11.57	25.31	1.1293	5.85833e-08	1.37383e-05
ENSSSCG00000015780	202	137	326	632	532	629	4.26	3.13	5.03	10.91	9.7	11.32	4.14	10.6433	1.3622	6.01091e-08	1.38351e-05
ENSSSCG00000036716	36127	44949	41237	22470	12983	15397	761.18	1028.36	636.45	387.82	236.67	277.15	808.663	300.547	-1.428	8.50374e-08	1.92169e-05
ENSSSCG00000030849	50392	58053	52297	29360	21000	22041	1061.74	1328.15	807.15	506.74	382.81	396.74	1065.68	428.763	-1.3135	8.98238e-08	1.99361e-05
ENSSSCG00000010196	380	285	626	1065	897	1063	8.01	6.52	9.66	18.38	16.35	19.13	8.06333	17.9533	1.1548	1.0649e-07	2.32204e-05
ENSSSCG00000033185	1415	667	1995	3597	4491	3750	29.81	15.26	30.79	62.08	81.87	67.5	25.2867	70.4833	1.4789	1.09547e-07	2.34752e-05
ENSSSCG00000002383	2178	1093	1802	4760	5823	4997	45.89	25.01	27.81	82.16	106.15	89.95	32.9033	92.7533	1.4952	1.27482e-07	2.68554e-05
ENSSSCG00000012061	1096	1326	1620	639	492	739	23.09	30.34	25	11.03	8.97	13.3	26.1433	11.1	-1.2359	1.5396e-07	3.13699e-05
ENSSSCG00000002857	58	37	89	281	188	239	1.22	0.85	1.37	4.85	3.43	4.3	1.14667	4.19333	1.8707	1.59484e-07	3.19713e-05
ENSSSCG00000026210	5711	2793	7753	14595	12237	15309	120.33	63.9	119.66	251.9	223.07	275.57	101.297	250.18	1.3044	1.70779e-07	3.36922e-05
ENSSSCG00000001472	3246	2345	4570	1889	1563	916	68.39	53.65	70.53	32.6	28.49	16.49	64.19	25.86	-1.3116	1.77849e-07	3.45388e-05
ENSSSCG00000027074	1067	699	2067	3322	2921	3866	22.48	15.99	31.9	57.34	53.25	69.59	23.4567	60.06	1.3564	2.06045e-07	3.88021e-05
ENSSSCG00000035080	26402	27336	26288	15446	10015	12742	556.28	625.4	405.73	266.59	182.56	229.36	529.137	226.17	-1.2262	2.51966e-07	4.67415e-05
ENSSSCG00000016494	1147	646	1767	3507	2627	2788	24.17	14.78	27.27	60.53	47.89	50.18	22.0733	52.8667	1.2601	2.57144e-07	4.70007e-05
ENSSSCG00000032896	271	273	572	943	954	948	5.71	6.25	8.83	16.28	17.39	17.06	6.93	16.91	1.2869	2.79836e-07	5.0407e-05
ENSSSCG00000024263	18151	26275	23023	10565	8781	10729	382.43	601.13	355.34	182.35	160.07	193.12	446.3	178.513	-1.322	2.91569e-07	5.17702e-05
ENSSSCG00000023434	1420	855	2343	4184	3120	4155	29.92	19.56	36.16	72.21	56.87	74.79	28.5467	67.9567	1.2513	3.03662e-07	5.31579e-05
ENSSSCG00000049023	507	364	802	1465	1071	1473	10.68	8.33	12.38	25.29	19.52	26.51	10.4633	23.7733	1.184	3.39236e-07	5.85606e-05
ENSSSCG00000004480	2953	4057	3452	1708	1435	1491	62.22	92.82	53.28	29.48	26.16	26.84	69.44	27.4933	-1.3367	3.54185e-07	5.95615e-05
ENSSSCG00000036201	1123	601	1196	2324	2355	2757	23.66	13.75	18.46	40.11	42.93	49.63	18.6233	44.2233	1.2477	3.54618e-07	5.95615e-05
ENSSSCG00000005235	2651	1430	4595	7040	9466	7714	55.86	32.72	70.92	121.51	172.56	138.85	53.1667	144.307	1.4405	3.85446e-07	6.38762e-05
ENSSSCG00000011120	1447	775	2492	4061	4740	3867	30.49	17.73	38.46	70.09	86.41	69.61	28.8933	75.37	1.3833	5.22918e-07	8.55177e-05
ENSSSCG00000014976	209	75	519	1317	1016	1265	4.4	1.72	8.01	22.73	18.52	22.77	4.71	21.34	2.1798	5.73456e-07	9.1378e-05
ENSSSCG00000024313	3929	5120	4469	2184	2076	2081	82.78	117.14	68.97	37.69	37.84	37.46	89.63	37.6633	-1.2508	6.05443e-07	9.52538e-05
ENSSSCG00000011600	1971	1405	3421	4904	5914	4799	41.53	32.14	52.8	84.64	107.81	86.38	42.1567	92.9433	1.1406	6.39726e-07	9.81624e-05
ENSSSCG00000040406	1023	1604	1153	488	515	385	21.55	36.7	17.8	8.42	9.39	6.93	25.35	8.24667	-1.6201	6.89925e-07	0.000104574
ENSSSCG00000028464	895	733	2029	8063	5087	2383	18.86	16.77	31.32	139.16	92.73	42.89	22.3167	91.5933	2.0371	7.13624e-07	0.000106863
ENSSSCG00000005312	2284	2773	4444	1911	1464	1073	48.12	63.44	68.59	32.98	26.69	19.31	60.05	26.3267	-1.1896	8.31002e-07	0.000118719
ENSSSCG00000002449	1587	1598	1421	859	614	611	33.44	36.56	21.93	14.83	11.19	11	30.6433	12.34	-1.3122	8.9894e-07	0.000126425
ENSSSCG00000010169	853	571	1238	1790	1927	2231	17.97	13.06	19.11	30.89	35.13	40.16	16.7133	35.3933	1.0825	9.07494e-07	0.000126425
ENSSSCG00000025499	3116	3609	4475	2481	1700	1560	65.65	82.57	69.07	42.82	30.99	28.08	72.43	33.9633	-1.0926	9.15459e-07	0.000126425
ENSSSCG00000012027	274	101	314	1200	601	838	5.77	2.31	4.85	20.71	10.96	15.08	4.31	15.5833	1.8542	9.47091e-07	0.000129356
ENSSSCG00000040186	4764	6953	7001	3334	2737	3076	100.38	159.07	108.05	57.54	49.89	55.37	122.5	54.2667	-1.1746	9.79836e-07	0.000132374
ENSSSCG00000000456	352	194	730	1181	1221	1457	7.42	4.44	11.27	20.38	22.26	26.23	7.71	22.9567	1.5741	1.00384e-06	0.000134158
ENSSSCG00000017544	4655	7564	6781	2920	2968	2509	98.08	173.05	104.66	50.4	54.1	45.16	125.263	49.8867	-1.3282	1.09441e-06	0.000144706
ENSSSCG00000022204	3095	1939	5249	11169	11034	6418	65.21	44.36	81.01	192.77	201.14	115.53	63.5267	169.813	1.4185	1.29466e-06	0.000167618
ENSSSCG00000040822	91	85	143	480	244	394	1.92	1.94	2.21	8.28	4.45	7.09	2.02333	6.60667	1.7072	1.48138e-06	0.000185981
ENSSSCG00000016113	623	352	1710	2976	3090	2855	13.13	8.05	26.39	51.36	56.33	51.39	15.8567	53.0267	1.7416	1.53092e-06	0.000186628
ENSSSCG00000011317	2728	1681	3369	5157	5881	5578	57.48	38.46	52	89.01	107.2	100.41	49.3133	98.8733	1.0036	1.53158e-06	0.000186628
ENSSSCG00000018094	68482	63730	84815	32270	35157	49884	1442.88	1458.03	1309.04	556.97	640.87	897.92	1403.32	698.587	-1.0063	1.70249e-06	0.000203463
ENSSSCG00000021825	40223	51170	47788	28467	20651	19768	847.48	1170.68	737.56	491.33	376.45	355.83	918.573	407.87	-1.1713	1.81587e-06	0.000214947
ENSSSCG00000030546	45363	58911	49936	30611	20242	20780	955.78	1347.78	770.71	528.33	368.99	374.05	1024.76	423.79	-1.2739	1.87101e-06	0.000219384
ENSSSCG00000002036	1086	1436	1218	622	525	559	22.88	32.85	18.8	10.74	9.57	10.06	24.8433	10.1233	-1.2952	1.91775e-06	0.000222763
ENSSSCG00000024613	289	193	640	1000	1077	1014	6.09	4.42	9.88	17.26	19.63	18.25	6.79667	18.38	1.4352	2.07893e-06	0.00023925
ENSSSCG00000013906	65092	85776	80814	45800	36560	36463	1371.46	1962.41	1247.29	790.49	666.45	656.34	1527.05	704.427	-1.1162	2.1447e-06	0.000244555
ENSSSCG00000028218	363	213	413	1090	676	877	7.65	4.87	6.37	18.81	12.32	15.79	6.29667	15.64	1.3126	2.34196e-06	0.00026462
ENSSSCG00000008141	231	198	344	828	494	755	4.87	4.53	5.31	14.29	9.01	13.59	4.90333	12.2967	1.3264	2.80649e-06	0.000311445
ENSSSCG00000035941	318	180	480	730	874	1095	6.7	4.12	7.41	12.6	15.93	19.71	6.07667	16.08	1.4039	2.9315e-06	0.000320639
ENSSSCG00000033768	3607	2232	8835	13749	13268	13216	76	51.06	136.36	237.3	241.86	237.89	87.8067	239.017	1.4447	2.94093e-06	0.000320639
ENSSSCG00000016981	2127	1045	2602	4215	4601	5122	44.81	23.91	40.16	72.75	83.87	92.2	36.2933	82.94	1.1924	2.97756e-06	0.00032181
ENSSSCG00000011766	98	57	250	380	636	589	2.06	1.3	3.86	6.56	11.59	10.6	2.40667	9.58333	1.9935	3.057e-06	0.000324747
ENSSSCG00000037416	5277	2714	8888	13396	13074	20820	111.18	62.09	137.18	231.21	238.33	374.77	103.483	281.437	1.4434	3.1144e-06	0.000328041
ENSSSCG00000011925	827	457	2474	4887	3888	4062	17.42	10.46	38.18	84.35	70.87	73.12	22.02	76.1133	1.7893	3.22285e-06	0.000336612
ENSSSCG00000024960	602	614	1081	1508	2108	2145	12.68	14.05	16.68	26.03	38.43	38.61	14.47	34.3567	1.2475	3.51651e-06	0.000364223
ENSSSCG00000018084	23187	27559	19860	10426	10769	11470	488.54	630.5	306.52	179.95	196.31	206.46	475.187	194.24	-1.2907	3.5726e-06	0.000366974
ENSSSCG00000006400	262	131	169	63	50	24	5.52	3	2.61	1.09	0.91	0.43	3.71	0.81	-2.1954	3.85034e-06	0.000392262
ENSSSCG00000004907	14	14	29	379	123	64	0.29	0.32	0.45	6.54	2.24	1.15	0.353333	3.31	3.2277	3.89432e-06	0.000392716
ENSSSCG00000046892	8383	10314	9432	5449	4802	4520	176.63	235.97	145.57	94.05	87.54	81.36	186.057	87.65	-1.0859	3.91799e-06	0.000392716
ENSSSCG00000025928	48431	63425	63572	37658	26799	28510	1020.42	1451.06	981.17	649.96	488.52	513.19	1150.88	550.557	-1.0638	4.38349e-06	0.0004324
ENSSSCG00000004931	792	647	1172	1941	1531	2234	16.69	14.8	18.09	33.5	27.91	40.21	16.5267	33.8733	1.0354	4.4195e-06	0.000432519
ENSSSCG00000033310	19205	18138	17973	12107	6948	5484	404.64	414.97	277.4	208.96	126.65	98.71	365.67	144.773	-1.3367	4.51467e-06	0.000438381
ENSSSCG00000006911	6192	3820	9813	14321	12161	15219	130.46	87.4	151.45	247.17	221.68	273.95	123.103	247.6	1.0081	4.68417e-06	0.000451314
ENSSSCG00000040452	261	163	408	673	617	645	5.5	3.73	6.3	11.62	11.25	11.61	5.17667	11.4933	1.1507	4.79565e-06	0.000458501
ENSSSCG00000035124	184	132	390	858	515	667	3.88	3.02	6.02	14.81	9.39	12.01	4.30667	12.07	1.4868	4.92721e-06	0.000466192
ENSSSCG00000026098	429	240	858	1583	1472	1160	9.04	5.49	13.24	27.32	26.83	20.88	9.25667	25.01	1.4339	4.95111e-06	0.000466192
ENSSSCG00000016123	189	62	365	802	714	789	3.98	1.42	5.63	13.84	13.02	14.2	3.67667	13.6867	1.8963	5.02287e-06	0.000469393
ENSSSCG00000027331	8998	5941	16146	32198	19658	22331	189.58	135.92	249.2	555.72	358.34	401.96	191.567	438.673	1.1953	5.14137e-06	0.000475291
ENSSSCG00000000867	17767	8009	22332	43097	44845	33294	374.34	183.23	344.67	743.84	817.48	599.3	300.747	720.207	1.2599	5.2007e-06	0.000475291
ENSSSCG00000006947	350	220	533	781	844	982	7.37	5.03	8.23	13.48	15.39	17.68	6.87667	15.5167	1.174	5.36765e-06	0.000484955
ENSSSCG00000013436	2790	4073	2920	1615	1445	1308	58.78	93.18	45.07	27.87	26.34	23.54	65.6767	25.9167	-1.3415	5.38448e-06	0.000484955
ENSSSCG00000035189	1114	1083	2583	3515	3887	3596	23.47	24.78	39.87	60.67	70.86	64.73	29.3733	65.42	1.1552	5.48149e-06	0.00049014
ENSSSCG00000024591	1176	697	1786	2796	2381	2576	24.78	15.95	27.57	48.26	43.4	46.37	22.7667	46.01	1.015	5.53438e-06	0.000491334
ENSSSCG00000007308	2497	3201	2748	1595	1349	1260	52.61	73.23	42.41	27.53	24.59	22.68	56.0833	24.9333	-1.1695	5.60486e-06	0.000494062
ENSSSCG00000034227	86037	99407	88730	57432	43867	42949	1812.76	2274.26	1369.46	991.25	799.65	773.09	1818.83	854.663	-1.0896	5.64472e-06	0.000494072
ENSSSCG00000032464	330	153	673	1178	1246	1083	6.95	3.5	10.39	20.33	22.71	19.49	6.94667	20.8433	1.5852	5.72816e-06	0.00049787
ENSSSCG00000012571	623	730	860	2126	1544	2503	13.13	16.7	13.27	36.69	28.15	45.05	14.3667	36.63	1.3503	5.80582e-06	0.000501115
ENSSSCG00000035595	2923	1843	5152	7821	6356	10515	61.59	42.16	79.52	134.99	115.86	189.27	61.09	146.707	1.2639	5.92038e-06	0.000507479
ENSSSCG00000015657	450	414	122	89	64	57	9.48	9.47	1.88	1.54	1.17	1.03	6.94333	1.24667	-2.4776	6.01657e-06	0.000512191
ENSSSCG00000016244	553	606	1048	1551	1615	1991	11.65	13.86	16.17	26.77	29.44	35.84	13.8933	30.6833	1.1431	6.14913e-06	0.000516402
ENSSSCG00000017226	391	179	277	109	112	78	8.24	4.1	4.28	1.88	2.04	1.4	5.54	1.77333	-1.6434	6.42851e-06	0.000533734
ENSSSCG00000026414	2836	3922	3987	1980	1945	1782	59.75	89.73	61.54	34.17	35.46	32.08	70.34	33.9033	-1.0529	6.4414e-06	0.000533734
ENSSSCG00000032786	74	42	115	240	217	258	1.56	0.96	1.77	4.14	3.96	4.64	1.43	4.24667	1.5703	6.94876e-06	0.000564485
ENSSSCG00000002755	236	91	751	1269	1767	1596	4.97	2.08	11.59	21.9	32.21	28.73	6.21333	27.6133	2.1519	7.46864e-06	0.000598889
ENSSSCG00000015175	486	306	501	950	1495	1120	10.24	7	7.73	16.4	27.25	20.16	8.32333	21.27	1.3536	7.9278e-06	0.000627609
ENSSSCG00000014800	742	946	1265	446	589	366	15.63	21.64	19.52	7.7	10.74	6.59	18.93	8.34333	-1.182	8.40759e-06	0.00066138
ENSSSCG00000028015	269	511	660	207	195	142	5.67	11.69	10.19	3.57	3.55	2.56	9.18333	3.22667	-1.509	9.32609e-06	0.000729019
ENSSSCG00000033608	1976	1877	3624	6372	5376	4339	41.63	42.94	55.93	109.98	98	78.1	46.8333	95.36	1.0258	9.5159e-06	0.000739207
ENSSSCG00000037396	2521	3914	1898	1423	707	556	53.12	89.55	29.29	24.56	12.89	10.01	57.32	15.82	-1.8573	1.13353e-05	0.000858792
ENSSSCG00000000647	194	76	169	425	504	491	4.09	1.74	2.61	7.34	9.19	8.84	2.81333	8.45667	1.5878	1.13488e-05	0.000858792
ENSSSCG00000027157	38636	26423	62719	81341	80571	109904	814.04	604.51	968.01	1403.91	1468.72	1978.3	795.52	1616.98	1.0233	1.14008e-05	0.000858792
ENSSSCG00000033001	1584	890	1539	2562	4319	4997	33.37	20.36	23.75	44.22	78.73	89.95	25.8267	70.9667	1.4583	1.15261e-05	0.000862996
ENSSSCG00000008892	254	187	482	710	654	798	5.35	4.28	7.44	12.25	11.92	14.36	5.69	12.8433	1.1745	1.16319e-05	0.000865705
ENSSSCG00000021490	582	587	1116	1652	1431	1783	12.26	13.43	17.22	28.51	26.09	32.09	14.3033	28.8967	1.0146	1.19465e-05	0.000883831
ENSSSCG00000001099	465	244	1151	1566	2265	1998	9.8	5.58	17.76	27.03	41.29	35.96	11.0467	34.76	1.6538	1.20234e-05	0.000884252
ENSSSCG00000026850	5763	7365	4164	2419	2628	2303	121.42	168.5	64.27	41.75	47.91	41.45	118.063	43.7033	-1.4337	1.28749e-05	0.00094131
ENSSSCG00000028567	1053	841	1370	771	500	377	22.19	19.24	21.14	13.31	9.11	6.79	20.8567	9.73667	-1.099	1.33499e-05	0.000970327
ENSSSCG00000010067	7005	10031	9170	5077	4621	4063	147.59	229.49	141.53	87.63	84.24	73.13	172.87	81.6667	-1.0819	1.38375e-05	0.00099992
ENSSSCG00000034876	1052	1275	1312	767	559	650	22.17	29.17	20.25	13.24	10.19	11.7	23.8633	11.71	-1.0271	1.4388e-05	0.0010173
ENSSSCG00000010862	2074	1442	4586	6314	5748	6428	43.7	32.99	70.78	108.98	104.78	115.71	49.1567	109.823	1.1597	1.62553e-05	0.00111956
ENSSSCG00000009682	180	134	364	542	533	574	3.79	3.07	5.62	9.35	9.72	10.33	4.16	9.8	1.2362	1.64041e-05	0.00111956
ENSSSCG00000013073	2174	2568	3549	1998	1308	1096	45.81	58.75	54.78	34.48	23.84	19.73	53.1133	26.0167	-1.0296	1.64763e-05	0.00111956
ENSSSCG00000037275	4656	5576	4866	2790	2576	2873	98.1	127.57	75.1	48.15	46.96	51.71	100.257	48.94	-1.0346	1.78088e-05	0.00117193
ENSSSCG00000050940	1612	2582	2282	1187	1017	998	33.96	59.07	35.22	20.49	18.54	17.96	42.75	18.9967	-1.1702	1.78406e-05	0.00117193
ENSSSCG00000005455	423	293	926	1520	1204	1252	8.91	6.7	14.29	26.23	21.95	22.54	9.96667	23.5733	1.242	1.79152e-05	0.00117193
ENSSSCG00000013399	184	57	515	1102	836	1295	3.88	1.3	7.95	19.02	15.24	23.31	4.37667	19.19	2.1325	1.84889e-05	0.00120313
ENSSSCG00000010527	546	317	634	1324	1158	946	11.5	7.25	9.79	22.85	21.11	17.03	9.51333	20.33	1.0956	1.90817e-05	0.00123439
ENSSSCG00000021353	5786	3136	11266	16803	15378	15313	121.91	71.75	173.88	290.01	280.32	275.64	122.513	281.99	1.2027	1.91678e-05	0.00123439
ENSSSCG00000008061	5311	8006	7414	3862	3038	3931	111.9	183.16	114.43	66.66	55.38	70.76	136.497	64.2667	-1.0867	1.96542e-05	0.00125918
ENSSSCG00000021414	113	72	218	393	305	485	2.38	1.65	3.36	6.78	5.56	8.73	2.46333	7.02333	1.5115	2.03402e-05	0.00129645
ENSSSCG00000025156	582	271	1013	1636	1788	1453	12.26	6.2	15.63	28.24	32.59	26.15	11.3633	28.9933	1.3513	2.04802e-05	0.00129871
ENSSSCG00000037735	2400	2237	5874	6521	10807	9966	50.57	51.18	90.66	112.55	197	179.39	64.1367	162.98	1.3455	2.28807e-05	0.00141223
ENSSSCG00000047538	230	149	331	574	501	493	4.85	3.41	5.11	9.91	9.13	8.87	4.45667	9.30333	1.0618	2.29881e-05	0.00141223
ENSSSCG00000015882	825	509	1450	1837	2120	2292	17.38	11.65	22.38	31.71	38.65	41.26	17.1367	37.2067	1.1185	2.30538e-05	0.00141223
ENSSSCG00000032129	10727	14790	9340	5962	5082	5366	226.01	338.37	144.15	102.9	92.64	96.59	236.177	97.3767	-1.2782	2.31792e-05	0.00141223
ENSSSCG00000001076	1045	567	1384	1874	3091	2626	22.02	12.97	21.36	32.34	56.35	47.27	18.7833	45.32	1.2707	2.37015e-05	0.0014302
ENSSSCG00000006361	1667	2247	1239	686	700	777	35.12	51.41	19.12	11.84	12.76	13.99	35.2167	12.8633	-1.453	2.37043e-05	0.0014302
ENSSSCG00000001835	594	392	1273	1698	2090	1719	12.52	8.97	19.65	29.31	38.1	30.94	13.7133	32.7833	1.2574	2.45108e-05	0.00146617
ENSSSCG00000032561	665	336	1557	2205	2518	2445	14.01	7.69	24.03	38.06	45.9	44.01	15.2433	42.6567	1.4846	2.56086e-05	0.00152291
ENSSSCG00000005252	255	54	538	1107	1449	1109	5.37	1.24	8.3	19.11	26.41	19.96	4.97	21.8267	2.1348	2.59218e-05	0.0015329
ENSSSCG00000000194	11822	12099	10573	6973	6561	5631	249.08	276.8	163.18	120.35	119.6	101.36	229.687	113.77	-1.0135	2.60231e-05	0.0015329
ENSSSCG00000008629	1707	652	3026	5303	4560	4980	35.97	14.92	46.7	91.53	83.12	89.64	32.53	88.0967	1.4373	2.62494e-05	0.00153893
ENSSSCG00000002032	1609	1296	2315	3441	3176	4995	33.9	29.65	35.73	59.39	57.9	89.91	33.0933	69.0667	1.0614	2.65161e-05	0.00154727
ENSSSCG00000030668	2956	3919	3614	2124	1885	1782	62.28	89.66	55.78	36.66	34.36	32.08	69.24	34.3667	-1.0106	2.67727e-05	0.00154771
ENSSSCG00000027847	647	518	654	278	328	135	13.63	11.85	10.09	4.8	5.98	2.43	11.8567	4.40333	-1.429	2.70885e-05	0.00155872
ENSSSCG00000031261	865	346	1725	2377	3503	2977	18.23	7.92	26.62	41.03	63.86	53.59	17.59	52.8267	1.5865	2.92937e-05	0.00167784
ENSSSCG00000023525	757	427	1218	1663	3126	1902	15.95	9.77	18.8	28.7	56.98	34.24	14.84	39.9733	1.4295	3.01225e-05	0.0017174
ENSSSCG00000002386	1176	3078	4562	898	949	1356	24.78	70.42	70.41	15.5	17.3	24.41	55.2033	19.07	-1.5335	3.07905e-05	0.00174747
ENSSSCG00000011351	8498	11280	9364	5753	5096	4933	179.05	258.07	144.52	99.29	92.89	88.8	193.88	93.66	-1.0497	3.11119e-05	0.00175519
ENSSSCG00000033025	2011	1021	3557	4933	5180	5207	42.37	23.36	54.9	85.14	94.43	93.73	40.21	91.1	1.1799	3.1209e-05	0.00175519
ENSSSCG00000011893	5294	6622	4977	3560	2420	2561	111.54	151.5	76.82	61.44	44.11	46.1	113.287	50.55	-1.1642	3.43984e-05	0.00189575
ENSSSCG00000004979	879	190	1762	3944	2905	4323	18.52	4.35	27.19	68.07	52.96	77.82	16.6867	66.2833	1.99	3.4471e-05	0.00189575
ENSSSCG00000012283	157	62	275	435	636	522	3.31	1.42	4.24	7.51	11.59	9.4	2.99	9.5	1.6678	3.59937e-05	0.00196613
ENSSSCG00000016834	414	185	723	1098	1271	1130	8.72	4.23	11.16	18.95	23.17	20.34	8.03667	20.82	1.3733	3.6067e-05	0.00196613
ENSSSCG00000004081	70	18	146	290	361	369	1.47	0.41	2.25	5.01	6.58	6.64	1.37667	6.07667	2.1421	3.77276e-05	0.00204432
ENSSSCG00000010151	1869	900	4528	8103	5789	6665	39.38	20.59	69.89	139.85	105.53	119.97	43.2867	121.783	1.4923	3.78303e-05	0.00204432
ENSSSCG00000002908	176	289	642	158	127	93	3.71	6.61	9.91	2.73	2.32	1.67	6.74333	2.24	-1.59	3.9839e-05	0.00214355
ENSSSCG00000034570	33126	12533	30958	108739	138495	41060	697.95	286.73	477.81	1876.79	2524.62	739.09	487.497	1713.5	1.8135	4.10488e-05	0.00215599
ENSSSCG00000004244	2558	1149	3839	6019	5710	5659	53.9	26.29	59.25	103.89	104.09	101.86	46.48	103.28	1.1519	4.11208e-05	0.00215599
ENSSSCG00000004121	1558	715	1938	3375	2754	3431	32.83	16.36	29.91	58.25	50.2	61.76	26.3667	56.7367	1.1056	4.11993e-05	0.00215599
ENSSSCG00000009050	637	291	1169	1629	2281	1759	13.42	6.66	18.04	28.12	41.58	31.66	12.7067	33.7867	1.4109	4.33363e-05	0.00225367
ENSSSCG00000005110	1238	772	2512	3814	2794	3678	26.08	17.66	38.77	65.83	50.93	66.2	27.5033	60.9867	1.1489	5.18222e-05	0.00258674
ENSSSCG00000006338	82	11	188	405	511	627	1.73	0.25	2.9	6.99	9.31	11.29	1.62667	9.19667	2.4992	5.48803e-05	0.00270677
ENSSSCG00000028149	1981	3123	2932	1311	1032	1681	41.74	71.45	45.25	22.63	18.81	30.26	52.8133	23.9	-1.1439	5.53297e-05	0.00271815
ENSSSCG00000005710	1079	610	1031	2392	1889	1822	22.73	13.96	15.91	41.28	34.43	32.8	17.5333	36.17	1.0447	5.57452e-05	0.00272778
ENSSSCG00000022845	9402	4407	11713	17787	17919	18879	198.1	100.82	180.78	307	326.64	339.83	159.9	324.49	1.021	5.69476e-05	0.00276485
ENSSSCG00000037371	126	60	302	537	483	491	2.65	1.37	4.66	9.27	8.8	8.84	2.89333	8.97	1.6324	5.85531e-05	0.00280944
ENSSSCG00000016125	205	71	420	741	864	675	4.32	1.62	6.48	12.79	15.75	12.15	4.14	13.5633	1.712	5.90037e-05	0.00280944
ENSSSCG00000006381	1969	1115	3403	4772	4205	4622	41.49	25.51	52.52	82.36	76.65	83.2	39.84	80.7367	1.019	5.91049e-05	0.00280944
ENSSSCG00000022126	595	504	1274	1702	1701	1550	12.54	11.53	19.66	29.38	31.01	27.9	14.5767	29.43	1.0136	5.92223e-05	0.00280944
ENSSSCG00000011186	305	275	1271	1635	1759	2730	6.43	6.29	19.62	28.22	32.06	49.14	10.78	36.4733	1.7585	6.19513e-05	0.00288387
ENSSSCG00000008874	98	186	101	672	562	472	2.06	4.26	1.56	11.6	10.24	8.5	2.62667	10.1133	1.945	6.43628e-05	0.00298495
ENSSSCG00000008993	150	47	232	305	593	910	3.16	1.08	3.58	5.26	10.81	16.38	2.60667	10.8167	2.053	6.50421e-05	0.00298503
ENSSSCG00000004113	722	310	1088	1657	1830	1668	15.21	7.09	16.79	28.6	33.36	30.02	13.03	30.66	1.2345	6.52536e-05	0.00298503
ENSSSCG00000026571	12147	6361	19388	27238	26112	25510	255.93	145.53	299.24	470.12	475.99	459.19	233.567	468.433	1.004	6.54779e-05	0.00298503
ENSSSCG00000007056	508	511	1088	1824	1182	1852	10.7	11.69	16.79	31.48	21.55	33.34	13.06	28.79	1.1404	6.62765e-05	0.00299546
ENSSSCG00000032060	644	790	798	429	310	459	13.57	18.07	12.32	7.4	5.65	8.26	14.6533	7.10333	-1.0447	6.87577e-05	0.00309634
ENSSSCG00000005313	504	624	681	404	297	294	10.62	14.28	10.51	6.97	5.41	5.29	11.8033	5.89	-1.0029	7.21229e-05	0.00321296
ENSSSCG00000004419	745	393	1729	2502	2115	2860	15.7	8.99	26.69	43.18	38.55	51.48	17.1267	44.4033	1.3744	7.47843e-05	0.00327312
ENSSSCG00000003582	274	201	468	797	538	908	5.77	4.6	7.22	13.76	9.81	16.34	5.86333	13.3033	1.182	7.47902e-05	0.00327312
ENSSSCG00000036961	48	14	97	254	140	402	1.01	0.32	1.5	4.38	2.55	7.24	0.943333	4.72333	2.324	7.7217e-05	0.00333331
ENSSSCG00000032973	302	502	405	154	162	206	6.36	11.48	6.25	2.66	2.95	3.71	8.03	3.10667	-1.37	7.75063e-05	0.00333331
ENSSSCG00000039337	106	40	289	498	489	591	2.23	0.92	4.46	8.6	8.91	10.64	2.53667	9.38333	1.8872	7.80696e-05	0.00333446
ENSSSCG00000026707	1862	965	2787	3595	3942	5101	39.23	22.08	43.01	62.05	71.86	91.82	34.7733	75.2433	1.1136	7.86989e-05	0.00334982
ENSSSCG00000009285	51	90	202	39	21	21	1.07	2.06	3.12	0.67	0.38	0.38	2.08333	0.476667	-2.1278	7.94705e-05	0.00337112
ENSSSCG00000004275	487	292	643	874	1053	1164	10.26	6.68	9.92	15.08	19.2	20.95	8.95333	18.41	1.04	8.07534e-05	0.00338339
ENSSSCG00000044127	32	5	128	309	435	306	0.67	0.11	1.98	5.33	7.93	5.51	0.92	6.25667	2.7657	8.11208e-05	0.00338339
ENSSSCG00000015579	114	98	235	323	1458	406	2.4	2.24	3.63	5.57	26.58	7.31	2.75667	13.1533	2.2544	8.34714e-05	0.00346979
ENSSSCG00000009666	746	960	692	477	292	369	15.72	21.96	10.68	8.23	5.32	6.64	16.12	6.73	-1.2602	8.47647e-05	0.0035118
ENSSSCG00000001499	5520	3824	13571	13556	21918	24700	116.3	87.49	209.46	233.97	399.54	444.61	137.75	359.373	1.3834	8.64159e-05	0.00354476
ENSSSCG00000033860	275	102	709	875	1784	1280	5.79	2.33	10.94	15.1	32.52	23.04	6.35333	23.5533	1.8903	8.87479e-05	0.00359299
ENSSSCG00000016164	834	361	1072	2119	1656	1566	17.57	8.26	16.55	36.57	30.19	28.19	14.1267	31.65	1.1638	9.01423e-05	0.00361413
ENSSSCG00000033844	2698	2235	4848	6679	5492	9876	56.85	51.13	74.82	115.28	100.11	177.77	60.9333	131.053	1.1049	9.08743e-05	0.00363176
ENSSSCG00000005981	904	635	1482	2092	1789	3298	19.05	14.53	22.87	36.11	32.61	59.36	18.8167	42.6933	1.182	9.15145e-05	0.00364562
ENSSSCG00000030560	651	280	1017	1840	1195	2297	13.72	6.41	15.7	31.76	21.78	41.35	11.9433	31.63	1.4051	9.31461e-05	0.00368698
ENSSSCG00000034569	524	192	689	1192	1033	1690	11.04	4.39	10.63	20.57	18.83	30.42	8.68667	23.2733	1.4218	9.59778e-05	0.00372379
ENSSSCG00000025980	57	19	113	179	359	253	1.2	0.43	1.74	3.09	6.54	4.55	1.12333	4.72667	2.073	9.66706e-05	0.00373142
ENSSSCG00000038351	383	517	838	334	320	215	8.07	11.83	12.93	5.76	5.83	3.87	10.9433	5.15333	-1.0865	9.74968e-05	0.00375166
ENSSSCG00000033591	1389	391	2743	4173	4614	5570	29.27	8.95	42.34	72.02	84.11	100.26	26.8533	85.4633	1.6702	9.97811e-05	0.00380444
ENSSSCG00000000029	971	558	1404	3125	1557	2368	20.46	12.77	21.67	53.94	28.38	42.62	18.3	41.6467	1.1864	0.000101387	0.0038369
ENSSSCG00000015284	1990	1065	2861	4059	4964	3680	41.93	24.37	44.16	70.06	90.49	66.24	36.82	75.5967	1.0378	0.000102587	0.00384052
ENSSSCG00000004718	81	15	242	522	607	516	1.71	0.34	3.74	9.01	11.06	9.29	1.93	9.78667	2.3422	0.000104025	0.00387225
ENSSSCG00000011825	3538	1695	4694	6368	8080	7234	74.54	38.78	72.45	109.91	147.29	130.21	61.9233	129.137	1.0603	0.000104802	0.00388303
ENSSSCG00000007324	415	243	1080	1445	1378	1811	8.74	5.56	16.67	24.94	25.12	32.6	10.3233	27.5533	1.4163	0.000105123	0.00388303
ENSSSCG00000003760	204	128	381	578	477	611	4.3	2.93	5.88	9.98	8.7	11	4.37	9.89333	1.1788	0.000106081	0.0038898
ENSSSCG00000020758	1768	3012	2218	1396	930	1133	37.25	68.91	34.23	24.09	16.95	20.39	46.7967	20.4767	-1.1924	0.000106384	0.0038898
ENSSSCG00000024486	840	386	1592	2356	2100	2400	17.7	8.83	24.57	40.66	38.28	43.2	17.0333	40.7133	1.2571	0.000106407	0.0038898
ENSSSCG00000024598	1165	774	2874	3890	3723	3536	24.55	17.71	44.36	67.14	67.87	63.65	28.8733	66.22	1.1975	0.000108923	0.00397009
ENSSSCG00000037347	198	203	361	85	4	9	4.17	4.64	5.57	1.47	0.07	0.16	4.79333	0.566667	-3.0805	0.00011348	0.00404139
ENSSSCG00000050094	824	964	781	487	458	443	17.36	22.05	12.05	8.41	8.35	7.97	17.1533	8.24333	-1.0572	0.000122907	0.0043398
ENSSSCG00000015384	1726	2223	1523	1206	599	780	36.37	50.86	23.51	20.82	10.92	14.04	36.9133	15.26	-1.2744	0.000124501	0.00438364
ENSSSCG00000032531	740	188	1966	3397	3900	3178	15.59	4.3	30.34	58.63	71.09	57.2	16.7433	62.3067	1.8958	0.000128972	0.00445642
ENSSSCG00000007039	420	165	481	1276	710	903	8.85	3.77	7.42	22.02	12.94	16.25	6.68	17.07	1.3535	0.000133813	0.00456913
ENSSSCG00000015396	1083	686	1962	2105	5675	3224	22.82	15.69	30.28	36.33	103.45	58.03	22.93	65.9367	1.5238	0.000134889	0.00458606
ENSSSCG00000010885	107	28	125	267	315	324	2.25	0.64	1.93	4.61	5.74	5.83	1.60667	5.39333	1.7471	0.000138782	0.0046873
ENSSSCG00000004897	1765	854	2717	3405	4968	4009	37.19	19.54	41.93	58.77	90.56	72.16	32.8867	73.83	1.1667	0.000140102	0.00471904
ENSSSCG00000002792	166	205	250	99	104	106	3.5	4.69	3.86	1.71	1.9	1.91	4.01667	1.84	-1.1263	0.000141914	0.00475431
ENSSSCG00000031630	889	1221	1041	612	559	572	18.73	27.93	16.07	10.56	10.19	10.3	20.91	10.35	-1.0146	0.00014755	0.00491528
ENSSSCG00000002005	665	970	1012	540	365	532	14.01	22.19	15.62	9.32	6.65	9.58	17.2733	8.51667	-1.0202	0.00015402	0.00507775
ENSSSCG00000037554	537	783	686	399	340	214	11.31	17.91	10.59	6.89	6.2	3.85	13.27	5.64667	-1.2327	0.000155365	0.00510853
ENSSSCG00000047799	158	156	299	607	496	373	3.33	3.57	4.61	10.48	9.04	6.71	3.83667	8.74333	1.1883	0.000157018	0.00514236
ENSSSCG00000037364	773	1106	946	636	358	439	16.29	25.3	14.6	10.98	6.53	7.9	18.73	8.47	-1.1449	0.000158008	0.00514236
ENSSSCG00000036436	242	202	412	535	584	690	5.1	4.62	6.36	9.23	10.65	12.42	5.36	10.7667	1.0063	0.000158011	0.00514236
ENSSSCG00000029998	425	164	834	1214	1398	1265	8.95	3.75	12.87	20.95	25.48	22.77	8.52333	23.0667	1.4363	0.000160177	0.00517412
ENSSSCG00000028109	544	203	1224	2073	1789	1763	11.46	4.64	18.89	35.78	32.61	31.73	11.6633	33.3733	1.5167	0.000160329	0.00517412
ENSSSCG00000031495	144	129	346	471	444	632	3.03	2.95	5.34	8.13	8.09	11.38	3.77333	9.2	1.2858	0.000160689	0.00517412
ENSSSCG00000007472	680	1031	1302	669	496	335	14.33	23.59	20.1	11.55	9.04	6.03	19.34	8.87333	-1.124	0.000163188	0.00524098
ENSSSCG00000016652	147	27	173	309	503	647	3.1	0.62	2.67	5.33	9.17	11.65	2.13	8.71667	2.0329	0.000164965	0.00527083
ENSSSCG00000012474	2080	1070	3397	4588	4695	4357	43.82	24.48	52.43	79.19	85.58	78.43	40.2433	81.0667	1.0104	0.000167888	0.00534283
ENSSSCG00000014173	1481	471	4148	6414	6598	6712	31.2	10.78	64.02	110.7	120.27	120.82	35.3333	117.263	1.7307	0.000169267	0.0053669
ENSSSCG00000015537	1457	910	2338	2881	2867	4075	30.7	20.82	36.08	49.72	52.26	73.35	29.2	58.4433	1.0011	0.00017357	0.00546322
ENSSSCG00000035297	7730	3649	7414	21959	33322	8942	162.87	83.48	114.43	379	607.42	160.96	120.26	382.46	1.6692	0.000174503	0.00546322
ENSSSCG00000010893	1769	479	3332	6253	5380	5080	37.27	10.96	51.43	107.92	98.07	91.44	33.22	99.1433	1.5775	0.000186125	0.00571196
ENSSSCG00000040166	203	109	258	392	444	725	4.28	2.49	3.98	6.77	8.09	13.05	3.58333	9.30333	1.3764	0.000187288	0.0057335
ENSSSCG00000009152	198	131	335	484	510	443	4.17	3	5.17	8.35	9.3	7.97	4.11333	8.54	1.0539	0.000191442	0.00580349
ENSSSCG00000005191	1694	680	2010	3419	2984	3494	35.69	15.56	31.02	59.01	54.4	62.89	27.4233	58.7667	1.0996	0.000193594	0.00584391
ENSSSCG00000009031	707	548	670	1444	1241	1634	14.9	12.54	10.34	24.92	22.62	29.41	12.5933	25.65	1.0263	0.000193996	0.00584391
ENSSSCG00000003331	396	486	811	358	299	180	8.34	11.12	12.52	6.18	5.45	3.24	10.66	4.95667	-1.1048	0.000194929	0.00584391
ENSSSCG00000013569	526	1431	668	361	341	300	11.08	32.74	10.31	6.23	6.22	5.4	18.0433	5.95	-1.6005	0.000195701	0.00584703
ENSSSCG00000027230	858	799	1890	1976	3317	2922	18.08	18.28	29.17	34.1	60.47	52.6	21.8433	49.0567	1.1673	0.000200228	0.00593192
ENSSSCG00000015498	862	330	1727	2498	2730	2449	18.16	7.55	26.65	43.11	49.77	44.08	17.4533	45.6533	1.3872	0.00020199	0.00596142
ENSSSCG00000031144	711	481	843	305	393	121	14.98	11	13.01	5.26	7.16	2.18	12.9967	4.86667	-1.4171	0.000202407	0.00596142
ENSSSCG00000004921	524	366	953	1682	980	1379	11.04	8.37	14.71	29.03	17.86	24.82	11.3733	23.9033	1.0716	0.000204525	0.00597569
ENSSSCG00000008881	1611	975	3008	4381	3118	4256	33.94	22.31	46.43	75.61	56.84	76.61	34.2267	69.6867	1.0258	0.000206221	0.00600263
ENSSSCG00000011455	489	395	1063	1164	1475	1661	10.3	9.04	16.41	20.09	26.89	29.9	11.9167	25.6267	1.1047	0.000207753	0.0060331
ENSSSCG00000012591	606	309	719	1010	1425	1257	12.77	7.07	11.1	17.43	25.98	22.63	10.3133	22.0133	1.0939	0.000209587	0.00604398
ENSSSCG00000014082	997	398	1643	2161	2844	2512	21.01	9.11	25.36	37.3	51.84	45.22	18.4933	44.7867	1.2761	0.000213722	0.00614896
ENSSSCG00000037951	268	115	349	550	644	584	5.65	2.63	5.39	9.49	11.74	10.51	4.55667	10.58	1.2153	0.000217687	0.00624817
ENSSSCG00000008504	2085	1182	3093	4758	3326	5705	43.93	27.04	47.74	82.12	60.63	102.69	39.57	81.8133	1.0479	0.000220842	0.00628453
ENSSSCG00000044512	279	90	1122	2524	1662	1672	5.88	2.06	17.32	43.56	30.3	30.1	8.42	34.6533	2.0411	0.000221074	0.00628453
ENSSSCG00000010949	1479	1049	2817	3486	5179	3239	31.16	24	43.48	60.17	94.41	58.3	32.88	70.96	1.1098	0.000221468	0.00628453
ENSSSCG00000006413	321	473	323	161	177	175	6.76	10.82	4.99	2.78	3.23	3.15	7.52333	3.05333	-1.301	0.000221995	0.00628513
ENSSSCG00000003126	46	66	72	237	151	226	0.97	1.51	1.11	4.09	2.75	4.07	1.19667	3.63667	1.6036	0.000224577	0.00632941
ENSSSCG00000003072	446	203	872	1252	1195	1252	9.4	4.64	13.46	21.61	21.78	22.54	9.16667	21.9767	1.2615	0.000230702	0.0064581
ENSSSCG00000008937	392	222	549	252	122	86	8.26	5.08	8.47	4.35	2.22	1.55	7.27	2.70667	-1.4254	0.000233691	0.00652708
ENSSSCG00000011485	594	247	911	1266	1229	2373	12.52	5.65	14.06	21.85	22.4	42.71	10.7433	28.9867	1.4319	0.000242579	0.00672995
ENSSSCG00000015885	131	83	219	459	245	477	2.76	1.9	3.38	7.92	4.47	8.59	2.68	6.99333	1.3837	0.000245505	0.00675085
ENSSSCG00000016885	1944	563	4475	6717	6574	7944	40.96	12.88	69.07	115.93	119.84	142.99	40.97	126.253	1.6237	0.000246324	0.00675842
ENSSSCG00000003753	502	412	286	193	161	199	10.58	9.43	4.41	3.33	2.93	3.58	8.14	3.28	-1.3113	0.000248258	0.00676627
ENSSSCG00000030467	433	105	1255	2343	2683	1688	9.12	2.4	19.37	40.44	48.91	30.38	10.2967	39.91	1.9546	0.000248788	0.00676627
ENSSSCG00000034802	840	242	1315	1890	5514	1775	17.7	5.54	20.3	32.62	100.51	31.95	14.5133	55.0267	1.9228	0.000251209	0.00678637
ENSSSCG00000015808	2541	1129	4865	6465	6654	6675	53.54	25.83	75.09	111.58	121.3	120.15	51.4867	117.677	1.1926	0.000256303	0.0068655
ENSSSCG00000037132	1279	918	2853	3231	3324	4188	26.95	21	44.03	55.77	60.59	75.39	30.66	63.9167	1.0598	0.00026008	0.00693676
ENSSSCG00000010648	1481	496	2239	3425	3181	4137	31.2	11.35	34.56	59.11	57.99	74.47	25.7033	63.8567	1.3129	0.00026551	0.00705132
ENSSSCG00000030300	2299	1034	1554	793	874	973	48.44	23.66	23.98	13.69	15.93	17.51	32.0267	15.71	-1.0276	0.000272831	0.00721493
ENSSSCG00000016892	49	55	46	151	157	362	1.03	1.26	0.71	2.61	2.86	6.52	1	3.99667	1.9988	0.000279279	0.00735012
ENSSSCG00000039158	52	72	140	623	253	186	1.1	1.65	2.16	10.75	4.61	3.35	1.63667	6.23667	1.93	0.000280341	0.00735012
ENSSSCG00000006199	487	209	907	1214	1696	1209	10.26	4.78	14	20.95	30.92	21.76	9.68	24.5433	1.3423	0.000281491	0.00735012
ENSSSCG00000013030	1970	3352	3269	2022	1207	1462	41.51	76.69	50.45	34.9	22	26.32	56.2167	27.74	-1.019	0.000289757	0.00752208
ENSSSCG00000022448	252	199	685	838	830	1093	5.31	4.55	10.57	14.46	15.13	19.67	6.81	16.42	1.2697	0.000290257	0.00752208
ENSSSCG00000022173	332	236	526	687	682	1007	7	5.4	8.12	11.86	12.43	18.13	6.84	14.14	1.0477	0.000291103	0.00752208
ENSSSCG00000032398	112	56	195	330	270	334	2.36	1.28	3.01	5.7	4.92	6.01	2.21667	5.54333	1.3224	0.000294502	0.00756273
ENSSSCG00000000625	584	166	1533	2264	2293	2869	12.3	3.8	23.66	39.08	41.8	51.64	13.2533	44.1733	1.7368	0.000302262	0.00771419
ENSSSCG00000035934	491	152	620	1205	961	1168	10.35	3.48	9.57	20.8	17.52	21.02	7.8	19.78	1.3425	0.000306945	0.00776991
ENSSSCG00000032612	1154	491	1030	3497	1935	1740	24.31	11.23	15.9	60.36	35.27	31.32	17.1467	42.3167	1.3033	0.000326154	0.00815648
ENSSSCG00000014112	161	46	479	808	789	837	3.39	1.05	7.39	13.95	14.38	15.07	3.94333	14.4667	1.8752	0.000331781	0.00826394
ENSSSCG00000021072	222	48	694	1357	1240	1153	4.68	1.1	10.71	23.42	22.6	20.75	5.49667	22.2567	2.0176	0.000338935	0.00839168
ENSSSCG00000009683	276	72	779	1128	1354	1486	5.82	1.65	12.02	19.47	24.68	26.75	6.49667	23.6333	1.8631	0.000341642	0.00844189
ENSSSCG00000031902	222	196	552	151	172	143	4.68	4.48	8.52	2.61	3.14	2.57	5.89333	2.77333	-1.0875	0.000345586	0.00849039
ENSSSCG00000016848	205	195	447	168	80	139	4.32	4.46	6.9	2.9	1.46	2.5	5.22667	2.28667	-1.1926	0.000348978	0.00855511
ENSSSCG00000007243	715	627	1447	1528	2149	2148	15.06	14.34	22.33	26.37	39.17	38.66	17.2433	34.7333	1.0103	0.000352152	0.00859901
ENSSSCG00000030354	246	36	500	949	1220	953	5.18	0.82	7.72	16.38	22.24	17.15	4.57333	18.59	2.0232	0.000356199	0.00865176
ENSSSCG00000023639	268	261	277	146	88	165	5.65	5.97	4.28	2.52	1.6	2.97	5.3	2.36333	-1.1652	0.0003564	0.00865176
ENSSSCG00000033601	1825	836	3095	4160	4683	3828	38.45	19.13	47.77	71.8	85.37	68.9	35.1167	75.3567	1.1016	0.00036686	0.00887103
ENSSSCG00000017790	236	120	588	862	791	786	4.97	2.75	9.08	14.88	14.42	14.15	5.6	14.4833	1.3709	0.000378563	0.0090738
ENSSSCG00000009090	1949	903	3676	4510	4903	5227	41.06	20.66	56.74	77.84	89.38	94.09	39.4867	87.1033	1.1414	0.000380506	0.0090738
ENSSSCG00000006453	1080	252	1812	3236	2561	3741	22.76	5.77	27.97	55.85	46.68	67.34	18.8333	56.6233	1.5881	0.000380714	0.0090738
ENSSSCG00000004205	2488	1216	3304	5310	3711	6797	52.42	27.82	50.99	91.65	67.65	122.35	43.7433	93.8833	1.1018	0.000383996	0.0091256
ENSSSCG00000011245	19689	11017	39617	41388	60528	53520	414.84	252.05	611.45	714.34	1103.36	963.37	426.113	927.023	1.1214	0.000386788	0.00915693
ENSSSCG00000005484	168	61	470	646	749	829	3.54	1.4	7.25	11.15	13.65	14.92	4.06333	13.24	1.7042	0.000388316	0.00917563
ENSSSCG00000002918	1002	1486	1147	692	735	527	21.11	34	17.7	11.94	13.4	9.49	24.27	11.61	-1.0638	0.000392805	0.00924121
ENSSSCG00000045919	42	5	165	353	488	340	0.88	0.11	2.55	6.09	8.9	6.12	1.18	7.03667	2.5761	0.000394809	0.00924121
ENSSSCG00000020872	697	723	196	197	145	215	14.69	16.54	3.03	3.4	2.64	3.87	11.42	3.30333	-1.7896	0.000424741	0.00971723
ENSSSCG00000007507	78	43	46	162	172	364	1.64	0.98	0.71	2.8	3.14	6.55	1.11	4.16333	1.9072	0.00042531	0.00971723
ENSSSCG00000027312	584	306	966	1735	1140	1202	12.3	7	14.91	29.95	20.78	21.64	11.4033	24.1233	1.081	0.00043028	0.00979478
ENSSSCG00000038138	1489	558	2280	3286	4930	2857	31.37	12.77	35.19	56.72	89.87	51.43	26.4433	66.0067	1.3197	0.000438265	0.00995832
ENSSSCG00000039889	858	449	1405	1670	1943	2023	18.08	10.27	21.68	28.82	35.42	36.41	16.6767	33.55	1.0085	0.00044218	0.0100289
ENSSSCG00000021562	705	148	1590	2039	2608	4037	14.85	3.39	24.54	35.19	47.54	72.67	14.26	51.8	1.861	0.000449404	0.0101189
ENSSSCG00000029257	494	183	149	93	93	96	10.41	4.19	2.3	1.61	1.7	1.73	5.63333	1.68	-1.7455	0.000450293	0.0101206
ENSSSCG00000008496	4257	1329	4988	7585	15158	7577	89.69	30.41	76.98	130.91	276.31	136.39	65.6933	181.203	1.4638	0.000452744	0.0101323
ENSSSCG00000015851	646	232	1361	1970	1855	2051	13.61	5.31	21.01	34	33.81	36.92	13.31	34.91	1.3911	0.000453259	0.0101323
ENSSSCG00000012693	139	115	167	85	59	71	2.93	2.63	2.58	1.47	1.08	1.28	2.71333	1.27667	-1.0877	0.000454953	0.0101519
ENSSSCG00000000778	182	72	166	336	449	358	3.83	1.65	2.56	5.8	8.18	6.44	2.68	6.80667	1.3447	0.000456477	0.0101677
ENSSSCG00000038436	2219	2999	2052	1689	1143	1164	46.75	68.61	31.67	29.15	20.84	20.95	49.01	23.6467	-1.0514	0.000476435	0.0104509
ENSSSCG00000001065	551	246	1225	1589	1548	1855	11.61	5.63	18.91	27.43	28.22	33.39	12.05	29.68	1.3005	0.000482341	0.0104808
ENSSSCG00000009283	257	199	211	542	1221	493	5.41	4.55	3.26	9.35	22.26	8.87	4.40667	13.4933	1.6145	0.000485531	0.0105134
ENSSSCG00000010513	951	531	1470	1859	2704	1810	20.04	12.15	22.69	32.09	49.29	32.58	18.2933	37.9867	1.0542	0.000495041	0.0106821
ENSSSCG00000009053	279	90	341	663	635	553	5.88	2.06	5.26	11.44	11.58	9.95	4.4	10.99	1.3206	0.000499496	0.0107189
ENSSSCG00000025478	1716	741	3534	4800	4271	4907	36.16	16.95	54.54	82.85	77.86	88.33	35.8833	83.0133	1.21	0.000517232	0.0109095
ENSSSCG00000013261	365	859	604	1621	1860	2978	7.69	19.65	9.32	27.98	33.91	53.6	12.22	38.4967	1.6555	0.000520735	0.0109095
ENSSSCG00000013314	1194	509	2257	3182	2890	2973	25.16	11.65	34.83	54.92	52.68	53.51	23.88	53.7033	1.1692	0.000522249	0.0109095
ENSSSCG00000034616	775	218	1553	2333	2505	2347	16.33	4.99	23.97	40.27	45.66	42.25	15.0967	42.7267	1.5009	0.000522257	0.0109095
ENSSSCG00000038702	524	870	697	394	404	244	11.04	19.9	10.76	6.8	7.36	4.39	13.9	6.18333	-1.1686	0.00052888	0.0109372
ENSSSCG00000029790	3433	1038	5469	7508	11026	7741	72.33	23.75	84.41	129.59	200.99	139.34	60.1633	156.64	1.3805	0.000529887	0.0109372
ENSSSCG00000034211	4682	3495	5035	3351	2026	947	98.65	79.96	77.71	57.84	36.93	17.05	85.44	37.2733	-1.1968	0.000530625	0.0109372
ENSSSCG00000001532	262	116	500	567	888	829	5.52	2.65	7.72	9.79	16.19	14.92	5.29667	13.6333	1.364	0.000545763	0.0111567
ENSSSCG00000035760	207	127	403	108	55	131	4.36	2.91	6.22	1.86	1	2.36	4.49667	1.74	-1.3698	0.000547921	0.011164
ENSSSCG00000015549	533	250	804	976	2291	1153	11.23	5.72	12.41	16.85	41.76	20.75	9.78667	26.4533	1.4346	0.000548074	0.011164
ENSSSCG00000044704	174	39	407	660	599	944	3.67	0.89	6.28	11.39	10.92	16.99	3.61333	13.1	1.8582	0.000548813	0.011164
ENSSSCG00000016810	262	234	536	855	533	932	5.52	5.35	8.27	14.76	9.72	16.78	6.38	13.7533	1.1082	0.000554392	0.0112224
ENSSSCG00000050244	894	285	1871	2585	3154	2567	18.84	6.52	28.88	44.62	57.49	46.21	18.08	49.44	1.4513	0.000561767	0.0112928
ENSSSCG00000034516	721	253	1293	2297	1191	3358	15.19	5.79	19.96	39.65	21.71	60.44	13.6467	40.6	1.5729	0.000591911	0.0116767
ENSSSCG00000036537	1114	688	2613	3220	2955	3222	23.47	15.74	40.33	55.58	53.87	58	26.5133	55.8167	1.074	0.000592777	0.0116767
ENSSSCG00000004367	25	19	40	2	1	6	0.53	0.43	0.62	0.03	0.02	0.11	0.526667	0.0533333	-3.3038	0.00059477	0.0116767
ENSSSCG00000033684	6077	5748	6172	5053	2584	1804	128.04	131.5	95.26	87.21	47.1	32.47	118.267	55.5933	-1.0891	0.000597362	0.0116923
ENSSSCG00000001458	805	226	276	201	91	163	16.96	5.17	4.26	3.47	1.66	2.93	8.79667	2.68667	-1.7111	0.000654874	0.0124137
ENSSSCG00000021038	1128	292	2084	2901	3191	3797	23.77	6.68	32.16	50.07	58.17	68.35	20.87	58.8633	1.4959	0.000654928	0.0124137
ENSSSCG00000031660	134	53	166	58	37	31	2.82	1.21	2.56	1	0.67	0.56	2.19667	0.743333	-1.5632	0.000660868	0.0124832
ENSSSCG00000003684	151	126	388	844	315	776	3.18	2.88	5.99	14.57	5.74	13.97	4.01667	11.4267	1.5083	0.000681949	0.0127458
ENSSSCG00000008976	38	49	47	159	332	103	0.8	1.12	0.73	2.74	6.05	1.85	0.883333	3.54667	2.0054	0.000683306	0.012752
ENSSSCG00000004658	3053	930	6851	10991	8260	10324	64.33	21.28	105.74	189.7	150.57	185.83	63.7833	175.367	1.4591	0.000686079	0.0127624
ENSSSCG00000004132	531	318	956	1269	998	1495	11.19	7.28	14.75	21.9	18.19	26.91	11.0733	22.3333	1.0121	0.000695495	0.0128836
ENSSSCG00000034266	243	189	472	561	571	779	5.12	4.32	7.28	9.68	10.41	14.02	5.57333	11.37	1.0286	0.000716214	0.0131684
ENSSSCG00000015567	4405	1402	8138	10206	14244	11339	92.81	32.08	125.6	176.15	259.65	204.1	83.4967	213.3	1.3531	0.000727074	0.0132721
ENSSSCG00000002777	139	187	218	98	94	49	2.93	4.28	3.36	1.69	1.71	0.88	3.52333	1.42667	-1.3043	0.000727639	0.0132721
ENSSSCG00000022419	1232	575	2132	2801	2796	2653	25.96	13.16	32.91	48.34	50.97	47.75	24.01	49.02	1.0297	0.000729829	0.0132721
ENSSSCG00000031154	280	239	635	722	742	1103	5.9	5.47	9.8	12.46	13.53	19.85	7.05667	15.28	1.1146	0.000744853	0.0134757
ENSSSCG00000012118	7121	3098	14544	16091	22332	19036	150.04	70.88	224.47	277.72	407.09	342.65	148.463	342.487	1.2059	0.000751883	0.0135634
ENSSSCG00000015879	490	579	539	316	358	219	10.32	13.25	8.32	5.45	6.53	3.94	10.63	5.30667	-1.0023	0.000776088	0.0138791
ENSSSCG00000011700	1945	593	1930	2759	3614	6212	40.98	13.57	29.79	47.62	65.88	111.82	28.1133	75.1067	1.4177	0.000793246	0.0141048
ENSSSCG00000035224	6713	7486	10590	4949	5665	1997	141.44	171.27	163.45	85.42	103.27	35.95	158.72	74.88	-1.0838	0.000802211	0.0142438
ENSSSCG00000004898	1350	944	4248	5244	4255	5919	28.44	21.6	65.56	90.51	77.56	106.54	38.5333	91.5367	1.2482	0.000805909	0.0142891
ENSSSCG00000015009	523	389	845	929	1704	1246	11.02	8.9	13.04	16.03	31.06	22.43	10.9867	23.1733	1.0767	0.000807696	0.0143004
ENSSSCG00000006310	38	44	106	135	212	222	0.8	1.01	1.64	2.33	3.86	4	1.15	3.39667	1.5625	0.000813482	0.0143173
ENSSSCG00000006678	156	141	267	373	633	374	3.29	3.23	4.12	6.44	11.54	6.73	3.54667	8.23667	1.2156	0.000816972	0.0143173
ENSSSCG00000008849	35	32	53	106	131	114	0.74	0.73	0.82	1.83	2.39	2.05	0.763333	2.09	1.4531	0.000821638	0.0143429
ENSSSCG00000022467	807	815	922	670	188	171	17	18.65	14.23	11.56	3.43	3.08	16.6267	6.02333	-1.4649	0.000837198	0.0145727
ENSSSCG00000010604	544	142	1504	2380	1696	2987	11.46	3.25	23.21	41.08	30.92	53.77	12.64	41.9233	1.7298	0.000842775	0.0146093
ENSSSCG00000010429	287	28	448	998	909	1140	6.05	0.64	6.91	17.23	16.57	20.52	4.53333	18.1067	1.9979	0.000849709	0.0146508
ENSSSCG00000016510	103	50	206	265	379	310	2.17	1.14	3.18	4.57	6.91	5.58	2.16333	5.68667	1.3943	0.000850655	0.0146508
ENSSSCG00000025182	905	214	2119	2635	3811	3531	19.07	4.9	32.7	45.48	69.47	63.56	18.89	59.5033	1.6553	0.000859373	0.0146719
ENSSSCG00000015414	295	148	479	641	748	609	6.22	3.39	7.39	11.06	13.64	10.96	5.66667	11.8867	1.0688	0.00088514	0.0149476
ENSSSCG00000000927	203	34	398	685	790	737	4.28	0.78	6.14	11.82	14.4	13.27	3.73333	13.1633	1.818	0.000886733	0.0149541
ENSSSCG00000003222	125	80	168	70	61	42	2.63	1.83	2.59	1.21	1.11	0.76	2.35	1.02667	-1.1947	0.000895628	0.0150185
ENSSSCG00000000457	3133	1091	4317	5793	8817	5843	66.01	24.96	66.63	99.98	160.72	105.18	52.5333	121.96	1.2151	0.000930781	0.0153782
ENSSSCG00000022318	449	236	633	1041	688	1052	9.46	5.4	9.77	17.97	12.54	18.94	8.21	16.4833	1.0056	0.000931675	0.0153782
ENSSSCG00000037096	179	186	204	129	92	86	3.77	4.26	3.15	2.23	1.68	1.55	3.72667	1.82	-1.0339	0.000966312	0.0157615
ENSSSCG00000007861	151	100	213	78	13	8	3.18	2.29	3.29	1.35	0.24	0.14	2.92	0.576667	-2.3402	0.00100736	0.0162392
ENSSSCG00000016395	951	339	1719	2407	2460	2225	20.04	7.76	26.53	41.54	44.84	40.05	18.11	42.1433	1.2185	0.00103946	0.0164931
ENSSSCG00000009132	73	48	115	277	576	107	1.54	1.1	1.77	4.78	10.5	1.93	1.47	5.73667	1.9644	0.00104485	0.0165432
ENSSSCG00000015810	489	508	402	285	170	296	10.3	11.62	6.2	4.92	3.1	5.33	9.37333	4.45	-1.0748	0.00104618	0.0165432
ENSSSCG00000002379	367	525	319	229	141	223	7.73	12.01	4.92	3.95	2.57	4.01	8.22	3.51	-1.2277	0.00105272	0.0166044
ENSSSCG00000026233	223	106	318	466	442	484	4.7	2.43	4.91	8.04	8.06	8.71	4.01333	8.27	1.0431	0.00106104	0.0166932
ENSSSCG00000032632	182	72	369	776	462	456	3.83	1.65	5.7	13.39	8.42	8.21	3.72667	10.0067	1.425	0.0010747	0.0167747
ENSSSCG00000009968	400	126	1068	1519	1297	1767	8.43	2.88	16.48	26.22	23.64	31.81	9.26333	27.2233	1.5552	0.00108928	0.0168658
ENSSSCG00000022987	148	156	260	568	302	445	3.12	3.57	4.01	9.8	5.51	8.01	3.56667	7.77333	1.124	0.0011109	0.0170606
ENSSSCG00000035585	965	519	1832	2277	1892	2713	20.33	11.87	28.28	39.3	34.49	48.83	20.16	40.8733	1.0197	0.00111459	0.0170606
ENSSSCG00000015480	4779	2120	8816	11090	11043	10777	100.69	48.5	136.07	191.41	201.3	193.99	95.0867	195.567	1.0403	0.00113039	0.0171966
ENSSSCG00000011451	1196	1164	3011	6396	2676	3655	25.2	26.63	46.47	110.39	48.78	65.79	32.7667	74.9867	1.1944	0.00113602	0.0172401
ENSSSCG00000015402	813	950	2199	3043	2056	3533	17.13	21.73	33.94	52.52	37.48	63.59	24.2667	51.1967	1.0771	0.00114501	0.0173497
ENSSSCG00000015519	1241	568	2186	2754	3326	2486	26.15	12.99	33.74	47.53	60.63	44.75	24.2933	50.97	1.0691	0.00114696	0.0173497
ENSSSCG00000001793	824	785	1421	1858	1637	3240	17.36	17.96	21.93	32.07	29.84	58.32	19.0833	40.0767	1.0704	0.00117509	0.0176473
ENSSSCG00000011768	301	146	360	620	643	476	6.34	3.34	5.56	10.7	11.72	8.57	5.08	10.33	1.0239	0.00119562	0.0178182
ENSSSCG00000024674	133	17	306	662	667	468	2.8	0.39	4.72	11.43	12.16	8.42	2.63667	10.67	2.0168	0.00120714	0.017943
ENSSSCG00000015801	482	164	891	1198	1353	1226	10.16	3.75	13.75	20.68	24.66	22.07	9.22	22.47	1.2852	0.00121587	0.018012
ENSSSCG00000033228	1890	606	3034	4333	4376	4205	39.82	13.86	46.83	74.79	79.77	75.69	33.5033	76.75	1.1959	0.00122839	0.0181636
ENSSSCG00000005022	1821	490	3751	5056	5330	5750	38.37	11.21	57.89	87.26	97.16	103.5	35.8233	95.9733	1.4217	0.00123113	0.0181731
ENSSSCG00000005724	3889	1748	5539	7438	11257	6253	81.94	39.99	85.49	128.38	205.2	112.56	69.14	148.713	1.1049	0.00124746	0.0182829
ENSSSCG00000014113	448	286	418	1099	879	631	9.44	6.54	6.45	18.97	16.02	11.36	7.47667	15.45	1.0471	0.00126045	0.0183875
ENSSSCG00000000443	87	103	153	250	240	312	1.83	2.36	2.36	4.31	4.37	5.62	2.18333	4.76667	1.1264	0.00133823	0.0191061
ENSSSCG00000000839	3996	1758	5871	5952	12480	8868	84.19	40.22	90.61	102.73	227.5	159.63	71.6733	163.287	1.1879	0.00134297	0.0191419
ENSSSCG00000007574	230	121	511	602	712	662	4.85	2.77	7.89	10.39	12.98	11.92	5.17	11.7633	1.1861	0.00135134	0.0192172
ENSSSCG00000034367	61	5	206	438	375	512	1.29	0.11	3.18	7.56	6.84	9.22	1.52667	7.87333	2.3666	0.00135481	0.0192445
ENSSSCG00000035025	578	188	856	1820	820	1722	12.18	4.3	13.21	31.41	14.95	31	9.89667	25.7867	1.3816	0.0013674	0.0193183
ENSSSCG00000039224	244	584	304	192	140	174	5.14	13.36	4.69	3.31	2.55	3.13	7.73	2.99667	-1.3671	0.00138799	0.019471
ENSSSCG00000029761	122	157	183	100	42	69	2.57	3.59	2.82	1.73	0.77	1.24	2.99333	1.24667	-1.2637	0.00141801	0.0197142
ENSSSCG00000038804	262	353	139	87	33	134	5.52	8.08	2.15	1.5	0.6	2.41	5.25	1.50333	-1.8042	0.00142594	0.0198011
ENSSSCG00000009468	1013	189	2028	2521	4058	3429	21.34	4.32	31.3	43.51	73.97	61.72	18.9867	59.7333	1.6535	0.00143482	0.0198482
ENSSSCG00000010077	858	1647	1138	650	504	801	18.08	37.68	17.56	11.22	9.19	14.42	24.44	11.61	-1.0739	0.00143711	0.0198482
ENSSSCG00000031690	877	1055	858	432	694	432	18.48	24.14	13.24	7.46	12.65	7.78	18.62	9.29667	-1.0021	0.00143883	0.0198482
ENSSSCG00000016816	1048	614	2235	2105	3296	3004	22.08	14.05	34.5	36.33	60.08	54.07	23.5433	50.16	1.0912	0.00144909	0.0199234
ENSSSCG00000022945	248	376	406	191	78	211	5.23	8.6	6.27	3.3	1.42	3.8	6.7	2.84	-1.2383	0.00147045	0.0201502
ENSSSCG00000020705	488	293	727	886	1434	907	10.28	6.7	11.22	15.29	26.14	16.33	9.4	19.2533	1.0344	0.00147773	0.0202054
ENSSSCG00000038610	40	6	54	123	202	107	0.84	0.14	0.83	2.12	3.68	1.93	0.603333	2.57667	2.0945	0.0015286	0.0205999
ENSSSCG00000011239	3538	1283	4957	5433	12663	6964	74.54	29.35	76.51	93.77	230.83	125.35	60.1333	149.983	1.3186	0.00159054	0.0210138
ENSSSCG00000009357	145	39	193	335	342	358	3.06	0.89	2.98	5.78	6.23	6.44	2.31	6.15	1.4127	0.00162194	0.02125
ENSSSCG00000016986	443	47	850	1517	1647	1683	9.33	1.08	13.12	26.18	30.02	30.29	7.84333	28.83	1.878	0.00164147	0.0214756
ENSSSCG00000004535	648	222	1210	1814	1517	1588	13.65	5.08	18.68	31.31	27.65	28.58	12.47	29.18	1.2265	0.00166127	0.0216662
ENSSSCG00000027660	7257	2636	5926	10056	20863	10551	152.9	60.31	91.46	173.56	380.31	189.92	101.557	247.93	1.2876	0.00166445	0.021685
ENSSSCG00000000545	385	151	789	1019	1097	1002	8.11	3.45	12.18	17.59	20	18.04	7.91333	18.5433	1.2285	0.00167284	0.0217332
ENSSSCG00000020912	168	96	225	415	257	438	3.54	2.2	3.47	7.16	4.68	7.88	3.07	6.57333	1.0984	0.00167515	0.0217332
ENSSSCG00000017272	1373	590	2356	3137	2812	2944	28.93	13.5	36.36	54.14	51.26	52.99	26.2633	52.7967	1.0074	0.00169776	0.0219662
ENSSSCG00000023749	500	790	443	328	238	339	10.53	18.07	6.84	5.66	4.34	6.1	11.8133	5.36667	-1.1383	0.0017604	0.0224411
ENSSSCG00000041954	315	157	674	126	44	208	6.64	3.59	10.4	2.17	0.8	3.74	6.87667	2.23667	-1.6204	0.00176232	0.0224425
ENSSSCG00000032749	907	560	1395	1157	2652	3545	19.11	12.81	21.53	19.97	48.34	63.81	17.8167	44.04	1.3056	0.00177299	0.0225322
ENSSSCG00000031733	1081	458	2174	2371	2373	4146	22.78	10.48	33.55	40.92	43.26	74.63	22.27	52.9367	1.2492	0.00178627	0.0226547
ENSSSCG00000038362	1292	372	2297	3370	3550	2811	27.22	8.51	35.45	58.16	64.71	50.6	23.7267	57.8233	1.2851	0.00186727	0.0233318
ENSSSCG00000027701	1040	337	1030	2460	1552	1662	21.91	7.71	15.9	42.46	28.29	29.92	15.1733	33.5567	1.1451	0.00188834	0.0234233
ENSSSCG00000029815	1796	993	4203	4853	4381	5173	37.84	22.72	64.87	83.76	79.86	93.12	41.81	85.58	1.0334	0.00189756	0.0234778
ENSSSCG00000001869	312	71	1195	1818	1700	1767	6.57	1.62	18.44	31.38	30.99	31.81	8.87667	31.3933	1.8224	0.00191455	0.0235748
ENSSSCG00000046103	313	437	229	186	117	173	6.59	10	3.53	3.21	2.13	3.11	6.70667	2.81667	-1.2516	0.00192188	0.0235748
ENSSSCG00000004120	699	316	1287	1620	1742	1472	14.73	7.23	19.86	27.96	31.75	26.5	13.94	28.7367	1.0437	0.00193125	0.0235748
ENSSSCG00000012542	258	48	541	850	881	887	5.44	1.1	8.35	14.67	16.06	15.97	4.96333	15.5667	1.6491	0.001967	0.023782
ENSSSCG00000008575	1656	722	3558	4191	4411	4236	34.89	16.52	54.91	72.34	80.41	76.25	35.44	76.3333	1.1069	0.00202521	0.02418
ENSSSCG00000034395	1490	558	2665	3625	3224	3397	31.39	12.77	41.13	62.57	58.77	61.15	28.43	60.83	1.0974	0.00203418	0.0242013
ENSSSCG00000007139	88	46	125	179	199	239	1.85	1.05	1.93	3.09	3.63	4.3	1.61	3.67333	1.19	0.00203997	0.0242166
ENSSSCG00000033385	646	238	1015	1712	1249	1267	13.61	5.45	15.67	29.55	22.77	22.81	11.5767	25.0433	1.1132	0.00206921	0.024423
ENSSSCG00000023924	251	135	296	563	346	602	5.29	3.09	4.57	9.72	6.31	10.84	4.31667	8.95667	1.053	0.00207372	0.024423
ENSSSCG00000031423	233	343	185	149	64	125	4.91	7.85	2.86	2.57	1.17	2.25	5.20667	1.99667	-1.3828	0.00207383	0.024423
ENSSSCG00000011683	677	1040	1044	2020	1893	2374	14.26	23.79	16.11	34.86	34.51	42.73	18.0533	37.3667	1.0495	0.00207554	0.024423
ENSSSCG00000007552	245	461	315	99	139	223	5.16	10.55	4.86	1.71	2.53	4.01	6.85667	2.75	-1.3181	0.00208094	0.0244461
ENSSSCG00000016720	346	356	335	270	142	88	7.29	8.14	5.17	4.66	2.59	1.58	6.86667	2.94333	-1.2222	0.00214603	0.025067
ENSSSCG00000040337	135	265	480	559	780	989	2.84	6.06	7.41	9.65	14.22	17.8	5.43667	13.89	1.3533	0.0021469	0.025067
ENSSSCG00000039626	1947	1644	2391	1718	1003	523	41.02	37.61	36.9	29.65	18.28	9.41	38.51	19.1133	-1.0107	0.00214791	0.025067
ENSSSCG00000035420	4499	2566	5200	6080	15983	8052	94.79	58.71	80.26	104.94	291.35	144.94	77.92	180.41	1.2112	0.00219305	0.0253794
ENSSSCG00000011594	861	296	1997	2416	2604	2647	18.14	6.77	30.82	41.7	47.47	47.65	18.5767	45.6067	1.2958	0.0021951	0.0253794
ENSSSCG00000004027	84	50	248	300	393	306	1.77	1.14	3.83	5.18	7.16	5.51	2.24667	5.95	1.4051	0.00223435	0.0255716
ENSSSCG00000032436	2105	968	1548	3086	5656	2883	44.35	22.15	23.89	53.26	103.1	51.89	30.13	69.4167	1.2041	0.00225351	0.0256727
ENSSSCG00000011450	515	570	1448	2406	1345	1669	10.85	13.04	22.35	41.53	24.52	30.04	15.4133	32.03	1.0552	0.00226045	0.0257281
ENSSSCG00000015115	1736	519	4702	5673	6297	6324	36.58	11.87	72.57	97.91	114.79	113.83	40.34	108.843	1.432	0.00227135	0.0257579
ENSSSCG00000036036	4	15	52	140	116	85	0.08	0.34	0.8	2.42	2.11	1.53	0.406667	2.02	2.3124	0.00227909	0.0257973
ENSSSCG00000035634	1379	684	1573	2327	4836	1920	29.05	15.65	24.28	40.16	88.16	34.56	22.9933	54.2933	1.2396	0.00228687	0.0258396
ENSSSCG00000038147	435	658	252	196	217	220	9.17	15.05	3.89	3.38	3.96	3.96	9.37	3.76667	-1.3148	0.00237046	0.0264
ENSSSCG00000002387	426	121	837	1096	1212	1204	8.98	2.77	12.92	18.92	22.09	21.67	8.22333	20.8933	1.3452	0.00239752	0.0266363
ENSSSCG00000022009	24	49	57	284	38	408	0.51	1.12	0.88	4.9	0.69	7.34	0.836667	4.31	2.365	0.0023981	0.0266363
ENSSSCG00000021149	243	127	427	515	639	518	5.12	2.91	6.59	8.89	11.65	9.32	4.87333	9.95333	1.0303	0.00241009	0.0267217
ENSSSCG00000010645	444	153	708	910	1200	922	9.35	3.5	10.93	15.71	21.87	16.6	7.92667	18.06	1.188	0.00241733	0.0267781
ENSSSCG00000006802	718	353	1902	2450	1793	2565	15.13	8.08	29.36	42.29	32.68	46.17	17.5233	40.38	1.2044	0.00244662	0.0270062
ENSSSCG00000015129	1571	271	3355	4398	4892	6170	33.1	6.2	51.78	75.91	89.18	111.06	30.36	92.05	1.6002	0.00246681	0.0270529
ENSSSCG00000021105	120	112	132	55	76	35	2.53	2.56	2.04	0.95	1.39	0.63	2.37667	0.99	-1.2634	0.00247889	0.0271216
ENSSSCG00000031723	112	23	197	217	433	457	2.36	0.53	3.04	3.75	7.89	8.23	1.97667	6.62333	1.7445	0.00252725	0.027419
ENSSSCG00000034355	90	94	43	24	25	30	1.9	2.15	0.66	0.41	0.46	0.54	1.57	0.47	-1.74	0.00263974	0.0283434
ENSSSCG00000011678	1046	385	1943	2474	2720	2246	22.04	8.81	29.99	42.7	49.58	40.43	20.28	44.2367	1.1252	0.00266883	0.0285464
ENSSSCG00000002429	401	133	745	1135	949	934	8.45	3.04	11.5	19.59	17.3	16.81	7.66333	17.9	1.2239	0.00268657	0.0286712
ENSSSCG00000028662	199	36	327	497	422	898	4.19	0.82	5.05	8.58	7.69	16.16	3.35333	10.81	1.6887	0.00272491	0.0289292
ENSSSCG00000045502	121	8	281	560	677	495	2.55	0.18	4.34	9.67	12.34	8.91	2.35667	10.3067	2.1288	0.00273022	0.0289292
ENSSSCG00000016092	589	283	940	987	1210	1622	12.41	6.47	14.51	17.04	22.06	29.2	11.13	22.7667	1.0325	0.00275975	0.0290933
ENSSSCG00000008735	1289	615	2649	3130	2857	3245	27.16	14.07	40.88	54.02	52.08	58.41	27.37	54.8367	1.0025	0.00277672	0.0291725
ENSSSCG00000017672	1767	392	3366	4821	5040	4542	37.23	8.97	51.95	83.21	91.87	81.76	32.7167	85.6133	1.3878	0.00278711	0.0291725
ENSSSCG00000015897	3211	850	3545	4890	11662	4691	67.65	19.45	54.71	84.4	212.59	84.44	47.27	127.143	1.4275	0.00279096	0.0291725
ENSSSCG00000004285	72	20	162	10	5	31	1.52	0.46	2.5	0.17	0.09	0.56	1.49333	0.273333	-2.4498	0.0028657	0.029731
ENSSSCG00000015238	305	70	674	888	907	1161	6.43	1.6	10.4	15.33	16.53	20.9	6.14333	17.5867	1.5174	0.0028818	0.0298555
ENSSSCG00000008499	870	249	1554	1963	2289	2139	18.33	5.7	23.98	33.88	41.73	38.5	16.0033	38.0367	1.249	0.00288431	0.0298555
ENSSSCG00000004576	263	137	732	1119	833	726	5.54	3.13	11.3	19.31	15.18	13.07	6.65667	15.8533	1.2519	0.00305642	0.030935
ENSSSCG00000005423	5519	2764	13146	14144	17049	13534	116.28	63.24	202.9	244.12	310.79	243.62	127.473	266.177	1.0622	0.00306758	0.0309724
ENSSSCG00000040433	96	34	226	307	414	269	2.02	0.78	3.49	5.3	7.55	4.84	2.09667	5.89667	1.4918	0.00308896	0.0310872
ENSSSCG00000001021	508	197	1151	1309	1325	1668	10.7	4.51	17.76	22.59	24.15	30.02	10.99	25.5867	1.2192	0.00310545	0.0312027
ENSSSCG00000014997	7786	6410	9606	12803	28796	13543	164.05	146.65	148.26	220.97	524.92	243.78	152.987	329.89	1.1086	0.00315502	0.0315223
ENSSSCG00000026733	263	111	537	722	805	565	5.54	2.54	8.29	12.46	14.67	10.17	5.45667	12.4333	1.1881	0.00316074	0.0315541
ENSSSCG00000049952	60	9	161	276	303	262	1.26	0.21	2.48	4.76	5.52	4.72	1.31667	5	1.925	0.00326394	0.0320692
ENSSSCG00000038384	231	463	326	223	124	180	4.87	10.59	5.03	3.85	2.26	3.24	6.83	3.11667	-1.1319	0.00328938	0.0322427
ENSSSCG00000035774	379	300	1009	1402	992	1033	7.99	6.86	15.57	24.2	18.08	18.59	10.14	20.29	1.0007	0.00334345	0.0325417
ENSSSCG00000017534	97	68	161	211	208	286	2.04	1.56	2.48	3.64	3.79	5.15	2.02667	4.19333	1.049	0.0033809	0.0327013
ENSSSCG00000010647	901	506	2282	2116	3067	2676	18.98	11.58	35.22	36.52	55.91	48.17	21.9267	46.8667	1.0959	0.00345654	0.0331731
ENSSSCG00000034347	1613	317	2388	3215	4666	3491	33.99	7.25	36.86	55.49	85.06	62.84	26.0333	67.7967	1.3809	0.00347307	0.0332307
ENSSSCG00000005243	1827	676	2575	4440	2390	4443	38.49	15.47	39.74	76.63	43.57	79.98	31.2333	66.7267	1.0952	0.00347726	0.0332377
ENSSSCG00000015014	315	192	573	536	943	813	6.64	4.39	8.84	9.25	17.19	14.63	6.62333	13.69	1.0475	0.00355645	0.0337224
ENSSSCG00000020663	2725	745	6362	8480	7219	8601	57.41	17.04	98.19	146.36	131.59	154.82	57.5467	144.257	1.3258	0.00368562	0.0344425
ENSSSCG00000011075	1145	505	2005	1877	2691	3178	24.12	11.55	30.95	32.4	49.05	57.2	22.2067	46.2167	1.0574	0.00380281	0.0353265
ENSSSCG00000008456	271	112	351	362	578	944	5.71	2.56	5.42	6.25	10.54	16.99	4.56333	11.26	1.303	0.00380871	0.0353272
ENSSSCG00000035337	126	359	110	101	56	73	2.65	8.21	1.7	1.74	1.02	1.31	4.18667	1.35667	-1.6257	0.00382637	0.0353854
ENSSSCG00000017886	4542	1452	5203	7777	18653	5127	95.7	33.22	80.3	134.23	340.02	92.29	69.74	188.847	1.4372	0.0038594	0.0354405
ENSSSCG00000006619	773	190	1688	2161	2320	2281	16.29	4.35	26.05	37.3	42.29	41.06	15.5633	40.2167	1.3696	0.0038694	0.0354405
ENSSSCG00000012911	219	372	398	874	550	1052	4.61	8.51	6.14	15.08	10.03	18.94	6.42	14.6833	1.1935	0.00388805	0.0355458
ENSSSCG00000010606	1046	225	1726	2332	2509	2728	22.04	5.15	26.64	40.25	45.74	49.1	17.9433	45.03	1.3274	0.00389687	0.0355611
ENSSSCG00000002752	223	51	817	1000	989	1439	4.7	1.17	12.61	17.26	18.03	25.9	6.16	20.3967	1.7273	0.00390359	0.0355963
ENSSSCG00000010638	1632	494	2941	3483	4281	3731	34.39	11.3	45.39	60.12	78.04	67.16	30.36	68.44	1.1727	0.00394689	0.0359384
ENSSSCG00000009233	90	87	132	190	280	227	1.9	1.99	2.04	3.28	5.1	4.09	1.97667	4.15667	1.0724	0.00396095	0.0360136
ENSSSCG00000010509	8381	2059	14100	14881	28887	18379	176.58	47.11	217.62	256.84	526.58	330.83	147.103	371.417	1.3362	0.00401517	0.0363736
ENSSSCG00000000006	105	47	265	325	349	351	2.21	1.08	4.09	5.61	6.36	6.32	2.46	6.09667	1.3094	0.00406579	0.0365921
ENSSSCG00000037319	440	365	1615	437	404	281	9.27	8.35	24.93	7.54	7.36	5.06	14.1833	6.65333	-1.092	0.00408111	0.0366504
ENSSSCG00000034853	273	16	315	1106	1076	2161	5.75	0.37	4.86	19.09	19.61	38.9	3.66	25.8667	2.8212	0.00410334	0.0367278
ENSSSCG00000037637	2256	1087	3098	3912	8135	3138	47.53	24.87	47.81	67.52	148.29	56.48	40.07	90.7633	1.1796	0.00411787	0.0367374
ENSSSCG00000009844	384	282	533	798	557	1232	8.09	6.45	8.23	13.77	10.15	22.18	7.59	15.3667	1.0176	0.00412155	0.0367374
ENSSSCG00000010672	655	149	1066	1538	1429	1691	13.8	3.41	16.45	26.55	26.05	30.44	11.22	27.68	1.3028	0.00412288	0.0367374
ENSSSCG00000038420	158	68	174	83	63	51	3.33	1.56	2.69	1.43	1.15	0.92	2.52667	1.16667	-1.1148	0.00416613	0.0369472
ENSSSCG00000006981	154	24	259	348	534	477	3.24	0.55	4	6.01	9.73	8.59	2.59667	8.11	1.643	0.00429088	0.037696
ENSSSCG00000011918	105	32	349	459	530	432	2.21	0.73	5.39	7.92	9.66	7.78	2.77667	8.45333	1.6062	0.00429852	0.0377038
ENSSSCG00000014146	2008	573	2628	3133	3840	4826	42.31	13.11	40.56	54.07	70	86.87	31.9933	70.3133	1.136	0.00432548	0.0378601
ENSSSCG00000034213	172	45	442	557	534	749	3.62	1.03	6.82	9.61	9.73	13.48	3.82333	10.94	1.5167	0.00434686	0.037967
ENSSSCG00000001407	353	280	228	233	104	106	7.44	6.41	3.52	4.02	1.9	1.91	5.79	2.61	-1.1495	0.0043737	0.0380413
ENSSSCG00000039813	447	141	692	1302	712	999	9.42	3.23	10.68	22.47	12.98	17.98	7.77667	17.81	1.1955	0.00437825	0.0380413
ENSSSCG00000025130	403	246	978	1283	852	1223	8.49	5.63	15.09	22.14	15.53	22.01	9.73667	19.8933	1.0308	0.00438319	0.0380413
ENSSSCG00000037746	503	145	688	854	1318	985	10.6	3.32	10.62	14.74	24.03	17.73	8.18	18.8333	1.2031	0.00438597	0.0380413
ENSSSCG00000033260	127	171	211	93	63	119	2.68	3.91	3.26	1.61	1.15	2.14	3.28333	1.63333	-1.0073	0.00442702	0.0382552
ENSSSCG00000010359	135	75	164	300	191	383	2.84	1.72	2.53	5.18	3.48	6.89	2.36333	5.18333	1.1331	0.0044291	0.0382552
ENSSSCG00000012006	271	134	536	454	976	786	5.71	3.07	8.27	7.84	17.79	14.15	5.68333	13.26	1.2223	0.00444002	0.038298
ENSSSCG00000007244	1247	488	2297	2699	2750	2809	26.27	11.16	35.45	46.58	50.13	50.56	24.2933	49.09	1.0149	0.00444021	0.038298
ENSSSCG00000023485	201	59	479	654	550	713	4.23	1.35	7.39	11.29	10.03	12.83	4.32333	11.3833	1.3967	0.00445828	0.0384126
ENSSSCG00000003621	108	22	348	451	540	535	2.28	0.5	5.37	7.78	9.84	9.63	2.71667	9.08333	1.7414	0.00448916	0.0385529
ENSSSCG00000011076	190	70	271	436	333	417	4	1.6	4.18	7.53	6.07	7.51	3.26	7.03667	1.11	0.00449148	0.0385529
ENSSSCG00000011717	97	53	152	220	179	279	2.04	1.21	2.35	3.8	3.26	5.02	1.86667	4.02667	1.1091	0.00461742	0.0391617
ENSSSCG00000010276	387	105	890	1002	1125	1409	8.15	2.4	13.74	17.29	20.51	25.36	8.09667	21.0533	1.3786	0.00461983	0.0391617
ENSSSCG00000012608	557	84	892	1340	1499	1474	11.74	1.92	13.77	23.13	27.33	26.53	9.14333	25.6633	1.4889	0.00471109	0.0396446
ENSSSCG00000015743	567	219	1044	1358	1192	1275	11.95	5.01	16.11	23.44	21.73	22.95	11.0233	22.7067	1.0426	0.00480969	0.0402286
ENSSSCG00000006071	1115	348	2319	2962	2654	2959	23.49	7.96	35.79	51.12	48.38	53.26	22.4133	50.92	1.1839	0.00483126	0.0403818
ENSSSCG00000008326	236	58	585	537	1125	860	4.97	1.33	9.03	9.27	20.51	15.48	5.11	15.0867	1.5619	0.00486766	0.0405769
ENSSSCG00000017748	2078	727	4160	4915	4593	5452	43.78	16.63	64.21	84.83	83.73	98.14	41.54	88.9	1.0977	0.00487439	0.0405825
ENSSSCG00000006491	204	329	222	160	124	137	4.3	7.53	3.43	2.76	2.26	2.47	5.08667	2.49667	-1.0267	0.00487637	0.0405825
ENSSSCG00000016968	1099	266	1936	2714	2857	2353	23.16	6.09	29.88	46.84	52.08	42.35	19.71	47.09	1.2565	0.00489594	0.040649
ENSSSCG00000004607	115	60	221	293	232	368	2.42	1.37	3.41	5.06	4.23	6.62	2.4	5.30333	1.1439	0.00491716	0.0406887
ENSSSCG00000050498	250	123	492	578	706	538	5.27	2.81	7.59	9.98	12.87	9.68	5.22333	10.8433	1.0538	0.00502179	0.0410433
ENSSSCG00000008866	654	191	721	1053	919	1857	13.78	4.37	11.13	18.17	16.75	33.43	9.76	22.7833	1.223	0.00504842	0.0411759
ENSSSCG00000005498	69	7	255	369	502	424	1.45	0.16	3.94	6.37	9.15	7.63	1.85	7.71667	2.0605	0.00507142	0.0412788
ENSSSCG00000008686	204	313	90	129	53	60	4.3	7.16	1.39	2.23	0.97	1.08	4.28333	1.42667	-1.5861	0.00509306	0.0413263
ENSSSCG00000023243	408	97	988	1371	1218	1313	8.6	2.22	15.25	23.66	22.2	23.63	8.69	23.1633	1.4144	0.00512638	0.0414107
ENSSSCG00000015618	181	184	304	190	75	79	3.81	4.21	4.69	3.28	1.37	1.42	4.23667	2.02333	-1.0662	0.00517652	0.0415895
ENSSSCG00000009217	458	105	859	1226	961	1448	9.65	2.4	13.26	21.16	17.52	26.06	8.43667	21.58	1.3549	0.00519832	0.0416128
ENSSSCG00000040855	524	104	1098	1427	1515	1647	11.04	2.38	16.95	24.63	27.62	29.65	10.1233	27.3	1.4312	0.00519951	0.0416128
ENSSSCG00000029196	2266	422	5183	6112	7834	7187	47.74	9.65	79.99	105.49	142.81	129.37	45.7933	125.89	1.459	0.00525167	0.0419209
ENSSSCG00000017003	796	322	384	298	193	318	16.77	7.37	5.93	5.14	3.52	5.72	10.0233	4.79333	-1.0643	0.00525487	0.0419209
ENSSSCG00000000493	258	55	477	681	705	690	5.44	1.26	7.36	11.75	12.85	12.42	4.68667	12.34	1.3967	0.00528292	0.041983
ENSSSCG00000011522	410	302	637	1313	516	1138	8.64	6.91	9.83	22.66	9.41	20.48	8.46	17.5167	1.05	0.00536397	0.0423563
ENSSSCG00000035392	465	990	385	390	294	259	9.8	22.65	5.94	6.73	5.36	4.66	12.7967	5.58333	-1.1966	0.00537965	0.0424262
ENSSSCG00000004479	257	100	399	836	374	573	5.41	2.29	6.16	14.43	6.82	10.31	4.62	10.52	1.1872	0.00545935	0.0427025
ENSSSCG00000014081	636	120	1332	1573	1955	2087	13.4	2.75	20.56	27.15	35.64	37.57	12.2367	33.4533	1.4509	0.00546325	0.0427061
ENSSSCG00000034484	2660	1158	6741	7814	7015	7378	56.05	26.49	104.04	134.87	127.88	132.81	62.1933	131.853	1.0841	0.00548962	0.0428583
ENSSSCG00000034262	239	85	420	629	530	498	5.04	1.94	6.48	10.86	9.66	8.96	4.48667	9.82667	1.1311	0.00549431	0.0428681
ENSSSCG00000042498	1	0	4	29	8	31	0.02	0	0.06	0.5	0.15	0.56	0.0266667	0.403333	3.9189	0.00566925	0.0437116
ENSSSCG00000007034	211	57	387	602	373	738	4.45	1.3	5.97	10.39	6.8	13.28	3.90667	10.1567	1.3784	0.00568561	0.0437563
ENSSSCG00000016104	3997	1388	3187	6707	4290	8386	84.21	31.76	49.19	115.76	78.2	150.95	55.0533	114.97	1.0624	0.00574396	0.0439352
ENSSSCG00000011943	1245	256	2817	3476	3646	4030	26.23	5.86	43.48	59.99	66.46	72.54	25.19	66.33	1.3968	0.00577184	0.0440382
ENSSSCG00000038977	1002	311	1605	2000	2081	2159	21.11	7.12	24.77	34.52	37.93	38.86	17.6667	37.1033	1.0705	0.0057755	0.044039
ENSSSCG00000026176	158	64	241	261	481	354	3.33	1.46	3.72	4.5	8.77	6.37	2.83667	6.54667	1.2066	0.00580888	0.0442564
ENSSSCG00000009535	784	207	1517	2033	1450	2664	16.52	4.74	23.41	35.09	26.43	47.95	14.89	36.49	1.2932	0.00587792	0.0446417
ENSSSCG00000009564	329	277	298	187	84	10	6.93	6.34	4.6	3.23	1.53	0.18	5.95667	1.64667	-1.855	0.00599283	0.0450954
ENSSSCG00000000396	16202	5566	23590	23980	44492	29660	341.37	127.34	364.09	413.89	811.04	533.89	277.6	586.273	1.0786	0.00600814	0.0451243
ENSSSCG00000035818	114	102	113	75	22	50	2.4	2.33	1.74	1.29	0.4	0.9	2.15667	0.863333	-1.3208	0.00601058	0.0451243
ENSSSCG00000039049	315	160	255	693	318	860	6.64	3.66	3.94	11.96	5.8	15.48	4.74667	11.08	1.223	0.00605219	0.0453149
ENSSSCG00000025644	892	970	741	802	162	158	18.79	22.19	11.44	13.84	2.95	2.84	17.4733	6.54333	-1.4171	0.00608885	0.0455071
ENSSSCG00000010900	390	147	774	913	947	941	8.22	3.36	11.95	15.76	17.26	16.94	7.84333	16.6533	1.0863	0.00616825	0.0458524
ENSSSCG00000025406	2045	560	3356	4450	4561	4103	43.09	12.81	51.8	76.81	83.14	73.85	35.9	77.9333	1.1183	0.00618052	0.0459161
ENSSSCG00000009850	2039	636	2987	3272	4225	4528	42.96	14.55	46.1	56.47	77.02	81.51	34.5367	71.6667	1.0532	0.00623039	0.0461458
ENSSSCG00000021222	180	342	189	98	106	155	3.79	7.82	2.92	1.69	1.93	2.79	4.84333	2.13667	-1.1806	0.00625964	0.0462551
ENSSSCG00000037733	201	57	263	544	278	488	4.23	1.3	4.06	9.39	5.07	8.78	3.19667	7.74667	1.277	0.00640765	0.0468475
ENSSSCG00000013506	64	63	69	43	16	21	1.35	1.44	1.06	0.74	0.29	0.38	1.28333	0.47	-1.4492	0.00648662	0.0472027
ENSSSCG00000033858	884	1172	811	397	281	848	18.63	26.81	12.52	6.85	5.12	15.26	19.32	9.07667	-1.0899	0.00651949	0.047331
ENSSSCG00000004830	353	212	788	921	1503	633	7.44	4.85	12.16	15.9	27.4	11.39	8.15	18.23	1.1614	0.00654108	0.0474047
ENSSSCG00000004490	128	12	237	413	417	437	2.7	0.27	3.66	7.13	7.6	7.87	2.21	7.53333	1.7692	0.00660726	0.0476897
ENSSSCG00000006209	3604	1299	4831	5371	9054	5915	75.93	29.72	74.56	92.7	165.04	106.47	60.07	121.403	1.0151	0.006656	0.0479302
ENSSSCG00000015334	2361	1525	2399	8167	2166	5263	49.75	34.89	37.03	140.96	39.48	94.74	40.5567	91.7267	1.1774	0.00679268	0.0486046
ENSSSCG00000013773	507	273	1187	1334	1059	1574	10.68	6.25	18.32	23.02	19.3	28.33	11.75	23.55	1.0031	0.00681171	0.0486568
ENSSSCG00000021612	257	145	252	408	361	702	5.41	3.32	3.89	7.04	6.58	12.64	4.20667	8.75333	1.0572	0.00687448	0.0489039
ENSSSCG00000046808	63	30	143	247	125	251	1.33	0.69	2.21	4.26	2.28	4.52	1.41	3.68667	1.3866	0.00688545	0.0489039
ENSSSCG00000009430	1467	423	3990	4643	4684	4691	30.91	9.68	61.58	80.14	85.38	84.44	34.0567	83.32	1.2907	0.00689282	0.0489039
ENSSSCG00000023258	2299	1184	10262	18420	23196	13081	48.44	27.09	158.38	317.92	422.84	235.46	77.97	325.407	2.0613	0.00689462	0.0489039
ENSSSCG00000006760	3954	741	6946	9316	8626	10885	83.31	16.95	107.2	160.79	157.24	195.93	69.1533	171.32	1.3088	0.00689746	0.0489039
ENSSSCG00000006869	589	195	1006	1242	1401	1168	12.41	4.46	15.53	21.44	25.54	21.02	10.8	22.6667	1.0695	0.0069043	0.0489245
ENSSSCG00000026568	270	481	276	201	211	164	5.69	11	4.26	3.47	3.85	2.95	6.98333	3.42333	-1.0285	0.00693212	0.0490235
ENSSSCG00000012359	274	95	537	690	670	641	5.77	2.17	8.29	11.91	12.21	11.54	5.41	11.8867	1.1356	0.00693405	0.0490235
ENSSSCG00000027407	1019	301	1711	2354	1893	2316	21.47	6.89	26.41	40.63	34.51	41.69	18.2567	38.9433	1.093	0.00696356	0.0491105
ENSSSCG00000012309	94	16	173	218	269	380	1.98	0.37	2.67	3.76	4.9	6.84	1.67333	5.16667	1.6265	0.00700207	0.0491687
ENSSSCG00000023520	220	76	367	532	375	599	4.64	1.74	5.66	9.18	6.84	10.78	4.01333	8.93333	1.1544	0.00701059	0.0492008
ENSSSCG00000017728	156	56	265	345	427	316	3.29	1.28	4.09	5.95	7.78	5.69	2.88667	6.47333	1.1651	0.00704971	0.0494196
ENSSSCG00000044105	150	21	400	539	633	605	3.16	0.48	6.17	9.3	11.54	10.89	3.27	10.5767	1.6935	0.00713463	0.0497155
ENSSSCG00000029990	135	143	163	113	36	71	2.84	3.27	2.52	1.95	0.66	1.28	2.87667	1.29667	-1.1496	0.00720677	0.049896
ENSSSCG00000037035	185	84	431	465	593	480	3.9	1.92	6.65	8.03	10.81	8.64	4.15667	9.16	1.1399	0.00740738	0.0507628
ENSSSCG00000009381	215	48	480	657	623	650	4.53	1.1	7.41	11.34	11.36	11.7	4.34667	11.4667	1.3995	0.00747617	0.0510151
ENSSSCG00000012557	35	19	34	64	82	120	0.74	0.43	0.52	1.1	1.49	2.16	0.563333	1.58333	1.4909	0.00770454	0.0518425
ENSSSCG00000004923	25	5	58	104	111	90	0.53	0.11	0.9	1.79	2.02	1.62	0.513333	1.81	1.818	0.00772187	0.051852
ENSSSCG00000029395	89	127	110	63	53	61	1.88	2.91	1.7	1.09	0.97	1.1	2.16333	1.05333	-1.0383	0.008141	0.0534802
ENSSSCG00000001485	146	59	237	434	210	396	3.08	1.35	3.66	7.49	3.83	7.13	2.69667	6.15	1.1894	0.00824447	0.0540456
ENSSSCG00000039569	317	47	7	18	13	38	6.68	1.08	0.11	0.31	0.24	0.68	2.62333	0.41	-2.6777	0.00826301	0.0540816
ENSSSCG00000038870	1090	285	2382	2881	2894	2857	22.97	6.52	36.76	49.72	52.75	51.43	22.0833	51.3	1.216	0.00837492	0.0546414
ENSSSCG00000009501	205	42	491	770	535	685	4.32	0.96	7.58	13.29	9.75	12.33	4.28667	11.79	1.4596	0.00841496	0.0547354
ENSSSCG00000034820	577	188	1254	1442	1601	1385	12.16	4.3	19.35	24.89	29.18	24.93	11.9367	26.3333	1.1415	0.00843412	0.0547403
ENSSSCG00000033763	869	112	1453	2204	1899	2571	18.31	2.56	22.43	38.04	34.62	46.28	14.4333	39.6467	1.4578	0.00849029	0.0549964
ENSSSCG00000050014	184	76	290	484	340	337	3.88	1.74	4.48	8.35	6.2	6.07	3.36667	6.87333	1.0297	0.0085035	0.0549964
ENSSSCG00000028740	244	97	658	678	663	973	5.14	2.22	10.16	11.7	12.09	17.51	5.84	13.7667	1.2371	0.00850799	0.0549964
ENSSSCG00000008826	1171	267	2469	3128	2819	3314	24.67	6.11	38.11	53.99	51.39	59.65	22.9633	55.01	1.2604	0.00862937	0.0554573
ENSSSCG00000018009	176	140	567	483	782	644	3.71	3.2	8.75	8.34	14.26	11.59	5.22	11.3967	1.1265	0.0088	0.0560899
ENSSSCG00000015136	2095	500	3335	3688	4225	5521	44.14	11.44	51.47	63.65	77.02	99.38	35.6833	80.0167	1.1651	0.00903462	0.0572329
ENSSSCG00000004859	403	61	935	1345	1133	1377	8.49	1.4	14.43	23.21	20.65	24.79	8.10667	22.8833	1.4971	0.00913498	0.0574957
ENSSSCG00000000774	2687	761	2612	3575	9277	2970	56.61	17.41	40.31	61.7	169.11	53.46	38.11	94.7567	1.3141	0.00914309	0.0574957
ENSSSCG00000040334	1158	362	2105	2311	2203	3265	24.4	8.28	32.49	39.89	40.16	58.77	21.7233	46.2733	1.0909	0.00920159	0.0577026
ENSSSCG00000016901	412	356	1828	418	265	489	8.68	8.14	28.21	7.21	4.83	8.8	15.01	6.94667	-1.1115	0.00939495	0.0584726
ENSSSCG00000013351	138	23	303	554	355	421	2.91	0.53	4.68	9.56	6.47	7.58	2.70667	7.87	1.5398	0.0094349	0.0586039
ENSSSCG00000011049	376	188	1020	1032	1239	1020	7.92	4.3	15.74	17.81	22.59	18.36	9.32	19.5867	1.0715	0.00959342	0.0591745
ENSSSCG00000031905	78	96	126	169	224	317	1.64	2.2	1.94	2.92	4.08	5.71	1.92667	4.23667	1.1368	0.00962082	0.0592405
ENSSSCG00000032652	575	227	722	667	1830	1057	12.11	5.19	11.14	11.51	33.36	19.03	9.48	21.3	1.1679	0.0097006	0.059573
ENSSSCG00000006746	57	21	177	240	197	244	1.2	0.48	2.73	4.14	3.59	4.39	1.47	4.04	1.4585	0.00978072	0.0598251
ENSSSCG00000013233	1115	348	2285	2676	2722	2547	23.49	7.96	35.27	46.19	49.62	45.85	22.24	47.22	1.0862	0.00981943	0.0599648
ENSSSCG00000016147	860	239	1909	2030	2482	2264	18.12	5.47	29.46	35.04	45.24	40.75	17.6833	40.3433	1.1899	0.00988797	0.0602344
ENSSSCG00000001641	1804	543	3382	3999	4191	3800	38.01	12.42	52.2	69.02	76.4	68.4	34.21	71.2733	1.0589	0.00989219	0.0602344
ENSSSCG00000000783	66	5	171	291	291	284	1.39	0.11	2.64	5.02	5.3	5.11	1.38	5.14333	1.898	0.00990462	0.0602344
ENSSSCG00000023378	391	128	901	1107	1022	998	8.24	2.93	13.91	19.11	18.63	17.96	8.36	18.5667	1.1511	0.0101428	0.0611667
ENSSSCG00000015619	65	223	106	61	50	62	1.37	5.1	1.64	1.05	0.91	1.12	2.70333	1.02667	-1.3968	0.010208	0.0613814
ENSSSCG00000015632	68	26	122	220	117	210	1.43	0.59	1.88	3.8	2.13	3.78	1.3	3.23667	1.316	0.0102319	0.0614357
ENSSSCG00000011465	541	219	993	957	1642	1069	11.4	5.01	15.33	16.52	29.93	19.24	10.58	21.8967	1.0494	0.010245	0.0614846
ENSSSCG00000007909	1677	26	149	50	41	88	35.33	0.59	2.3	0.86	0.75	1.58	12.74	1.06333	-3.5827	0.0103347	0.0618735
ENSSSCG00000025703	1104	354	2242	2605	2471	2647	23.26	8.1	34.6	44.96	45.04	47.65	21.9867	45.8833	1.0613	0.0103706	0.0619397
ENSSSCG00000027002	200	108	245	278	354	563	4.21	2.47	3.78	4.8	6.45	10.13	3.48667	7.12667	1.0314	0.0103943	0.0619915
ENSSSCG00000000555	2334	834	5015	5814	5303	5411	49.18	19.08	77.4	100.35	96.67	97.4	48.5533	98.14	1.0153	0.0105866	0.062777
ENSSSCG00000029945	263	185	891	224	176	257	5.54	4.23	13.75	3.87	3.21	4.63	7.84	3.90333	-1.0061	0.0105931	0.0627857
ENSSSCG00000012845	57	92	162	67	33	48	1.2	2.1	2.5	1.16	0.6	0.86	1.93333	0.873333	-1.1465	0.0107716	0.0634509
ENSSSCG00000008765	143	66	407	618	319	511	3.01	1.51	6.28	10.67	5.82	9.2	3.6	8.56333	1.2502	0.0109592	0.0643117
ENSSSCG00000016119	157	23	570	1267	1203	1166	3.31	0.53	8.8	21.87	21.93	20.99	4.21333	21.5967	2.3578	0.0111687	0.0649194
ENSSSCG00000015015	64	3	130	194	213	361	1.35	0.07	2.01	3.35	3.88	6.5	1.14333	4.57667	2.0011	0.0113077	0.0653992
ENSSSCG00000016117	115	38	179	231	284	240	2.42	0.87	2.76	3.99	5.18	4.32	2.01667	4.49667	1.1569	0.0113462	0.0655918
ENSSSCG00000012467	42	5	63	112	122	133	0.88	0.11	0.97	1.93	2.22	2.39	0.653333	2.18	1.7384	0.0114561	0.0659205
ENSSSCG00000033222	553	85	1200	1677	3891	2394	11.65	1.94	18.52	28.94	70.93	43.09	10.7033	47.6533	2.1545	0.0115107	0.066112
ENSSSCG00000023585	745	558	384	216	105	492	15.7	12.77	5.93	3.73	1.91	8.86	11.4667	4.83333	-1.2464	0.0116062	0.0665071
ENSSSCG00000014897	131	95	286	65	1	56	2.76	2.17	4.41	1.12	0.02	1.01	3.11333	0.716667	-2.1191	0.0116454	0.0666155
ENSSSCG00000004739	1207	213	2604	3357	3368	3160	25.43	4.87	40.19	57.94	61.4	56.88	23.4967	58.74	1.3219	0.0118351	0.0673755
ENSSSCG00000031776	283	52	509	772	639	697	5.96	1.19	7.86	13.32	11.65	12.55	5.00333	12.5067	1.3217	0.0118499	0.0673755
ENSSSCG00000016230	374	70	485	642	676	965	7.88	1.6	7.49	11.08	12.32	17.37	5.65667	13.59	1.2645	0.0120657	0.0681624
ENSSSCG00000012768	109	47	358	439	379	399	2.3	1.08	5.53	7.58	6.91	7.18	2.97	7.22333	1.2822	0.0121106	0.0682954
ENSSSCG00000006098	226	64	409	508	501	552	4.76	1.46	6.31	8.77	9.13	9.94	4.17667	9.28	1.1518	0.0121504	0.0684573
ENSSSCG00000035366	711	239	1300	1322	1528	1744	14.98	5.47	20.06	22.82	27.85	31.39	13.5033	27.3533	1.0184	0.0121757	0.0685379
ENSSSCG00000011858	684	163	1421	1598	1759	1807	14.41	3.73	21.93	27.58	32.06	32.53	13.3567	30.7233	1.2018	0.0122248	0.0687212
ENSSSCG00000016850	1223	186	2970	6085	4596	7202	25.77	4.26	45.84	105.02	83.78	129.64	25.29	106.147	2.0694	0.0123136	0.0690325
ENSSSCG00000015791	422	107	621	796	862	853	8.89	2.45	9.58	13.74	15.71	15.35	6.97333	14.9333	1.0986	0.0123973	0.0692524
ENSSSCG00000003271	124	193	117	83	89	65	2.61	4.42	1.81	1.43	1.62	1.17	2.94667	1.40667	-1.0668	0.0124505	0.0694248
ENSSSCG00000023026	205	50	414	457	541	599	4.32	1.14	6.39	7.89	9.86	10.78	3.95	9.51	1.2676	0.0127256	0.0703287
ENSSSCG00000010652	563	90	1175	1546	1673	1404	11.86	2.06	18.13	26.68	30.5	25.27	10.6833	27.4833	1.3632	0.0130463	0.0713342
ENSSSCG00000030262	85	7	127	187	254	279	1.79	0.16	1.96	3.23	4.63	5.02	1.30333	4.29333	1.7199	0.0131169	0.0714388
ENSSSCG00000002690	92	28	211	264	298	242	1.94	0.64	3.26	4.56	5.43	4.36	1.94667	4.78333	1.297	0.0134317	0.0725835
ENSSSCG00000008873	808	227	1411	1742	1781	1580	17.02	5.19	21.78	30.07	32.47	28.44	14.6633	30.3267	1.0484	0.0135061	0.0726566
ENSSSCG00000034740	133	100	173	541	168	285	2.8	2.29	2.67	9.34	3.06	5.13	2.58667	5.84333	1.1757	0.0136268	0.0730346
ENSSSCG00000016887	276	29	325	471	505	866	5.82	0.66	5.02	8.13	9.21	15.59	3.83333	10.9767	1.5178	0.0136351	0.0730475
ENSSSCG00000015350	404	181	1160	1078	1179	1388	8.51	4.14	17.9	18.61	21.49	24.98	10.1833	21.6933	1.091	0.0138246	0.0736187
ENSSSCG00000032319	274	87	538	804	529	622	5.77	1.99	8.3	13.88	9.64	11.2	5.35333	11.5733	1.1123	0.0138624	0.0737884
ENSSSCG00000006767	336	95	551	755	547	838	7.08	2.17	8.5	13.03	9.97	15.08	5.91667	12.6933	1.1012	0.0141012	0.0745168
ENSSSCG00000039271	21	33	50	134	44	165	0.44	0.75	0.77	2.31	0.8	2.97	0.653333	2.02667	1.6332	0.0141337	0.0746254
ENSSSCG00000007727	206	68	817	933	614	1265	4.34	1.56	12.61	16.1	11.19	22.77	6.17	16.6867	1.4354	0.0143134	0.0751558
ENSSSCG00000015036	127	18	242	356	247	513	2.68	0.41	3.74	6.14	4.5	9.23	2.27667	6.62333	1.5406	0.0145975	0.076232
ENSSSCG00000035110	64	19	154	7	9	40	1.35	0.43	2.38	0.12	0.16	0.72	1.38667	0.333333	-2.0566	0.014864	0.0765926
ENSSSCG00000032702	998	173	2151	2765	5678	4086	21.03	3.96	33.2	47.72	103.5	73.55	19.3967	74.9233	1.9496	0.0149479	0.0766993
ENSSSCG00000000272	1225	330	2674	2947	3189	2926	25.81	7.55	41.27	50.86	58.13	52.67	24.8767	53.8867	1.1151	0.0149551	0.0766993
ENSSSCG00000040038	151	36	364	426	508	419	3.18	0.82	5.62	7.35	9.26	7.54	3.20667	8.05	1.3279	0.0150163	0.076847
ENSSSCG00000012055	2508	699	3137	3416	6315	3775	52.84	15.99	48.42	58.96	115.12	67.95	39.0833	80.6767	1.0456	0.0150543	0.0769222
ENSSSCG00000002260	30	1	140	242	234	232	0.63	0.02	2.16	4.18	4.27	4.18	0.936667	4.21	2.1682	0.0150552	0.0769222
ENSSSCG00000011713	285	110	363	599	280	943	6	2.52	5.6	10.34	5.1	16.97	4.70667	10.8033	1.1987	0.0153198	0.0775007
ENSSSCG00000034120	97	39	167	184	263	217	2.04	0.89	2.58	3.18	4.79	3.91	1.83667	3.96	1.1084	0.0153334	0.0775007
ENSSSCG00000051398	23	5	52	61	127	79	0.48	0.11	0.8	1.05	2.32	1.42	0.463333	1.59667	1.7849	0.0156103	0.0782981
ENSSSCG00000032122	74	67	65	46	31	32	1.56	1.53	1	0.79	0.57	0.58	1.36333	0.646667	-1.076	0.0156642	0.0785359
ENSSSCG00000031205	60	33	93	35	30	19	1.26	0.75	1.44	0.6	0.55	0.34	1.15	0.496667	-1.2113	0.0158199	0.078936
ENSSSCG00000031533	57	9	129	210	160	199	1.2	0.21	1.99	3.62	2.92	3.58	1.13333	3.37333	1.5736	0.0160048	0.0794107
ENSSSCG00000012853	4894	1776	4981	5740	15470	5629	103.11	40.63	76.88	99.07	282	101.32	73.54	160.797	1.1286	0.0162054	0.0800209
ENSSSCG00000005785	230	266	212	523	409	693	4.85	6.09	3.27	9.03	7.46	12.47	4.73667	9.65333	1.0272	0.0162777	0.0802519
ENSSSCG00000005723	83	61	53	37	26	36	1.75	1.4	0.82	0.64	0.47	0.65	1.32333	0.586667	-1.1736	0.0168501	0.0818846
ENSSSCG00000021712	13751	3546	12004	13622	38239	17651	289.73	81.13	185.27	235.11	697.06	317.72	185.377	416.63	1.1683	0.0170237	0.0822976
ENSSSCG00000007023	826	215	2425	2644	2625	2581	17.4	4.92	37.43	45.63	47.85	46.46	19.9167	46.6467	1.2278	0.0172546	0.0830011
ENSSSCG00000040184	504	263	615	1338	445	1261	10.62	6.02	9.49	23.09	8.11	22.7	8.71	17.9667	1.0446	0.0173097	0.0831912
ENSSSCG00000000667	59	14	194	152	328	290	1.24	0.32	2.99	2.62	5.98	5.22	1.51667	4.60667	1.6028	0.0173625	0.0833551
ENSSSCG00000007079	320	187	183	429	471	721	6.74	4.28	2.82	7.4	8.59	12.98	4.61333	9.65667	1.0657	0.0173869	0.0833551
ENSSSCG00000033906	70	13	50	43	521	69	1.47	0.3	0.77	0.74	9.5	1.24	0.846667	3.82667	2.1762	0.017594	0.0840634
ENSSSCG00000002656	489	117	1294	1443	1394	1512	10.3	2.68	19.97	24.91	25.41	27.22	10.9833	25.8467	1.2347	0.0176797	0.0842563
ENSSSCG00000043356	5	15	16	2	1	2	0.11	0.34	0.25	0.03	0.02	0.04	0.233333	0.03	-2.9594	0.0179366	0.0850421
ENSSSCG00000006781	1535	245	3225	4793	7359	5620	32.34	5.61	49.77	82.73	134.15	101.16	29.24	106.013	1.8582	0.018046	0.0852504
ENSSSCG00000027372	12219	3239	12892	14157	35697	14983	257.45	74.1	198.98	244.34	650.72	269.7	176.843	388.253	1.1345	0.0182278	0.0856706
ENSSSCG00000008648	1736	101	1277	3169	15967	2703	36.58	2.31	19.71	54.7	291.06	48.65	19.5333	131.47	2.7507	0.018382	0.0862151
ENSSSCG00000009964	41	70	67	38	9	25	0.86	1.6	1.03	0.66	0.16	0.45	1.16333	0.423333	-1.4584	0.0183994	0.0862641
ENSSSCG00000014211	627	155	1226	1525	1413	1353	13.21	3.55	18.92	26.32	25.76	24.35	11.8933	25.4767	1.099	0.0185117	0.0865942
ENSSSCG00000006450	170	124	84	103	38	17	3.58	2.84	1.3	1.78	0.69	0.31	2.57333	0.926667	-1.4735	0.0186942	0.0870547
ENSSSCG00000014256	51	35	71	137	89	116	1.07	0.8	1.1	2.36	1.62	2.09	0.99	2.02333	1.0312	0.0189253	0.0877697
ENSSSCG00000048627	44	55	21	21	14	6	0.93	1.26	0.32	0.36	0.26	0.11	0.836667	0.243333	-1.7817	0.019329	0.0891759
ENSSSCG00000032049	1769	501	3888	3661	4784	4277	37.27	11.46	60.01	63.19	87.21	76.99	36.2467	75.7967	1.0643	0.0193432	0.0891883
ENSSSCG00000013004	61	67	67	45	18	34	1.29	1.53	1.03	0.78	0.33	0.61	1.28333	0.573333	-1.1624	0.0196774	0.0903142
ENSSSCG00000036472	57	18	106	125	161	150	1.2	0.41	1.64	2.16	2.93	2.7	1.08333	2.59667	1.2612	0.0197563	0.0905091
ENSSSCG00000015820	1799	477	3207	3569	3823	3647	37.9	10.91	49.5	61.6	69.69	65.65	32.77	65.6467	1.0023	0.0198371	0.0907279
ENSSSCG00000035347	129	36	146	158	557	173	2.72	0.82	2.25	2.73	10.15	3.11	1.93	5.33	1.4655	0.0198825	0.0908527
ENSSSCG00000008803	1034	317	2761	2656	2788	3182	21.79	7.25	42.61	45.84	50.82	57.28	23.8833	51.3133	1.1033	0.0200806	0.0911883
ENSSSCG00000000688	119	245	1097	168	198	228	2.51	5.61	16.93	2.9	3.61	4.1	8.35	3.53667	-1.2394	0.0201378	0.0913444
ENSSSCG00000011025	536	73	1032	1565	1052	1476	11.29	1.67	15.93	27.01	19.18	26.57	9.63	24.2533	1.3326	0.0201846	0.0913444
ENSSSCG00000005170	484	80	1144	1371	1382	1363	10.2	1.83	17.66	23.66	25.19	24.53	9.89667	24.46	1.3054	0.0202321	0.0913787
ENSSSCG00000000997	4	5	18	33	23	56	0.08	0.11	0.28	0.57	0.42	1.01	0.156667	0.666667	2.0893	0.0202329	0.0913787
ENSSSCG00000016472	1037	1606	501	376	296	979	21.85	36.74	7.73	6.49	5.4	17.62	22.1067	9.83667	-1.1682	0.0205104	0.0921632
ENSSSCG00000020906	6339	1668	10273	9597	20644	9578	133.56	38.16	158.55	165.64	376.32	172.41	110.09	238.123	1.113	0.0206156	0.0924022
ENSSSCG00000003006	59	12	70	13	21	10	1.24	0.27	1.08	0.22	0.38	0.18	0.863333	0.26	-1.7314	0.020928	0.0934961
ENSSSCG00000036520	191	117	277	540	181	633	4.02	2.68	4.28	9.32	3.3	11.39	3.66	8.00333	1.1288	0.0212966	0.0942223
ENSSSCG00000003591	2436	518	4505	5734	5068	4995	51.33	11.85	69.53	98.97	92.38	89.91	44.2367	93.7533	1.0836	0.0216242	0.0950717
ENSSSCG00000032352	98	36	266	281	293	317	2.06	0.82	4.11	4.85	5.34	5.71	2.33	5.3	1.1857	0.0220807	0.0958977
ENSSSCG00000015584	45	6	77	101	112	173	0.95	0.14	1.19	1.74	2.04	3.11	0.76	2.29667	1.5955	0.0223364	0.0966642
ENSSSCG00000049011	24	6	22	66	57	43	0.51	0.14	0.34	1.14	1.04	0.77	0.33	0.983333	1.5752	0.022577	0.0973662
ENSSSCG00000039009	111	43	228	356	191	286	2.34	0.98	3.52	6.14	3.48	5.15	2.28	4.92333	1.1106	0.0226463	0.0974985
ENSSSCG00000004902	25	20	41	63	64	84	0.53	0.46	0.63	1.09	1.17	1.51	0.54	1.25667	1.2186	0.0226668	0.0974985
ENSSSCG00000033010	1534	265	5120	9737	6847	9893	32.32	6.06	79.02	168.06	124.81	178.08	39.1333	156.983	2.0041	0.0227959	0.097837
ENSSSCG00000011896	230	56	667	642	944	650	4.85	1.28	10.29	11.08	17.21	11.7	5.47333	13.33	1.2842	0.0232967	0.0991627
ENSSSCG00000032080	128	36	341	371	421	364	2.7	0.82	5.26	6.4	7.67	6.55	2.92667	6.87333	1.2318	0.0234862	0.0996961
ENSSSCG00000039045	239	38	682	840	805	760	5.04	0.87	10.53	14.5	14.67	13.68	5.48	14.2833	1.3821	0.0236472	0.100208
ENSSSCG00000021457	65	16	81	117	138	141	1.37	0.37	1.25	2.02	2.52	2.54	0.996667	2.36	1.2436	0.0238428	0.100762
ENSSSCG00000015016	1288	1351	1994	1599	540	186	27.14	30.91	30.78	27.6	9.84	3.35	29.61	13.5967	-1.1228	0.0243852	0.10226
ENSSSCG00000030685	892	159	1605	2090	1691	2082	18.79	3.64	24.77	36.07	30.83	37.48	15.7333	34.7933	1.145	0.0250799	0.103879
ENSSSCG00000006970	637	123	995	1482	969	1400	13.42	2.81	15.36	25.58	17.66	25.2	10.53	22.8133	1.1154	0.0250901	0.103879
ENSSSCG00000010204	77	31	128	211	133	162	1.62	0.71	1.98	3.64	2.42	2.92	1.43667	2.99333	1.059	0.025324	0.104466
ENSSSCG00000002259	3026	563	7003	7224	8212	7876	63.76	12.88	108.08	124.68	149.7	141.77	61.5733	138.717	1.1718	0.0255143	0.104867
ENSSSCG00000028331	103	75	92	62	48	12	2.17	1.72	1.42	1.07	0.87	0.22	1.77	0.72	-1.2977	0.0258042	0.105674
ENSSSCG00000007986	174	288	106	75	46	161	3.67	6.59	1.64	1.29	0.84	2.9	3.96667	1.67667	-1.2423	0.0260423	0.106232
ENSSSCG00000004646	270	126	414	470	337	888	5.69	2.88	6.39	8.11	6.14	15.98	4.98667	10.0767	1.0149	0.0263119	0.107013
ENSSSCG00000012049	102	205	148	503	332	296	2.15	4.69	2.28	8.68	6.05	5.33	3.04	6.68667	1.1372	0.0264148	0.107291
ENSSSCG00000004438	981	227	1777	2167	1973	1932	20.67	5.19	27.43	37.4	35.97	34.78	17.7633	36.05	1.0211	0.027764	0.110922
ENSSSCG00000025629	35	23	17	13	7	3	0.74	0.53	0.26	0.22	0.13	0.05	0.51	0.133333	-1.9355	0.0278985	0.111261
ENSSSCG00000015120	122	68	124	91	28	48	2.57	1.56	1.91	1.57	0.51	0.86	2.01333	0.98	-1.0387	0.0280423	0.111568
ENSSSCG00000004138	1071	280	2500	3294	2064	2631	22.57	6.41	38.59	56.85	37.62	47.36	22.5233	47.2767	1.0697	0.0281412	0.111782
ENSSSCG00000001403	124	138	130	94	74	15	2.61	3.16	2.01	1.62	1.35	0.27	2.59333	1.08	-1.2638	0.0282114	0.111954
ENSSSCG00000033229	85	27	171	164	174	324	1.79	0.62	2.64	2.83	3.17	5.83	1.68333	3.94333	1.2281	0.0287113	0.113179
ENSSSCG00000043560	49	121	20	21	0	25	1.03	2.77	0.31	0.36	0	0.45	1.37	0.27	-2.3431	0.0287569	0.113265
ENSSSCG00000033675	313	286	133	28	31	227	6.59	6.54	2.05	0.48	0.57	4.09	5.06	1.71333	-1.5623	0.0288006	0.113332
ENSSSCG00000037168	83	224	519	86	193	94	1.75	5.12	8.01	1.48	3.52	1.69	4.96	2.23	-1.1533	0.0289486	0.113538
ENSSSCG00000031666	243	48	337	486	368	541	5.12	1.1	5.2	8.39	6.71	9.74	3.80667	8.28	1.1211	0.0291608	0.113903
ENSSSCG00000017146	8144	1057	19640	20633	62790	23674	171.59	24.18	303.12	356.12	1144.6	426.14	166.297	642.287	1.9495	0.0302303	0.116542
ENSSSCG00000012076	17515	4805	16563	20897	90331	30912	369.03	109.93	255.63	360.67	1646.64	556.42	244.863	854.577	1.8032	0.0303202	0.116708
ENSSSCG00000040826	1387	203	2484	2799	3949	2481	29.22	4.64	38.34	48.31	71.99	44.66	24.0667	54.9867	1.192	0.0303974	0.116897
ENSSSCG00000014291	715	93	1956	3812	3034	3216	15.06	2.13	30.19	65.79	55.31	57.89	15.7933	59.6633	1.9175	0.0309637	0.118415
ENSSSCG00000010959	129	13	310	470	337	407	2.72	0.3	4.78	8.11	6.14	7.33	2.6	7.19333	1.4681	0.0314421	0.119595
ENSSSCG00000022830	81	24	155	209	146	227	1.71	0.55	2.39	3.61	2.66	4.09	1.55	3.45333	1.1557	0.0315299	0.119651
ENSSSCG00000032673	215	40	411	502	501	487	4.53	0.92	6.34	8.66	9.13	8.77	3.93	8.85333	1.1717	0.0318647	0.120354
ENSSSCG00000023479	27	15	59	90	73	73	0.57	0.34	0.91	1.55	1.33	1.31	0.606667	1.39667	1.203	0.0319511	0.120485
ENSSSCG00000037179	219	98	140	252	473	298	4.61	2.24	2.16	4.35	8.62	5.36	3.00333	6.11	1.0246	0.0320193	0.120706
ENSSSCG00000005688	75	151	140	379	226	246	1.58	3.45	2.16	6.54	4.12	4.43	2.39667	5.03	1.0695	0.0325549	0.121748
ENSSSCG00000029866	85	72	81	181	112	255	1.79	1.65	1.25	3.12	2.04	4.59	1.56333	3.25	1.0558	0.0325985	0.121781
ENSSSCG00000022780	309	45	469	710	608	571	6.51	1.03	7.24	12.25	11.08	10.28	4.92667	11.2033	1.1852	0.0327072	0.121967
ENSSSCG00000040173	30	16	18	10	3	7	0.63	0.37	0.28	0.17	0.05	0.13	0.426667	0.116667	-1.8707	0.0328302	0.122171
ENSSSCG00000005058	356	73	778	847	861	887	7.5	1.67	12.01	14.62	15.7	15.97	7.06	15.43	1.128	0.0331795	0.123101
ENSSSCG00000031692	22	7	39	64	51	68	0.46	0.16	0.6	1.1	0.93	1.22	0.406667	1.08333	1.4136	0.0334244	0.123788
ENSSSCG00000030108	11129	2130	13838	16731	51916	19286	234.48	48.73	213.58	288.77	946.37	347.15	165.597	527.43	1.6713	0.0334979	0.123871
ENSSSCG00000011111	73	24	183	243	243	150	1.54	0.55	2.82	4.19	4.43	2.7	1.63667	3.77333	1.2051	0.0335094	0.123871
ENSSSCG00000014567	233	34	420	563	412	649	4.91	0.78	6.48	9.72	7.51	11.68	4.05667	9.63667	1.2482	0.0336114	0.123963
ENSSSCG00000001395	183	55	117	27	91	43	3.86	1.26	1.81	0.47	1.66	0.77	2.31	0.966667	-1.2568	0.0338124	0.124557
ENSSSCG00000037581	372	273	70	165	115	95	7.84	6.25	1.08	2.85	2.1	1.71	5.05667	2.22	-1.1876	0.0338952	0.124714
ENSSSCG00000010454	4876	1081	4570	6625	25083	7504	102.74	24.73	70.53	114.34	457.24	135.07	66	235.55	1.8355	0.0339518	0.124885
ENSSSCG00000003547	33	24	78	104	108	81	0.7	0.55	1.2	1.79	1.97	1.46	0.816667	1.74	1.0913	0.0339846	0.124932
ENSSSCG00000000182	103	73	61	67	20	34	2.17	1.67	0.94	1.16	0.36	0.61	1.59333	0.71	-1.1662	0.0347132	0.126813
ENSSSCG00000012375	190	46	379	408	533	371	4	1.05	5.85	7.04	9.72	6.68	3.63333	7.81333	1.1046	0.0357115	0.128833
ENSSSCG00000003076	52	38	147	164	171	141	1.1	0.87	2.27	2.83	3.12	2.54	1.41333	2.83	1.0017	0.0367327	0.130854
ENSSSCG00000022903	681	105	1175	1311	1393	1552	14.35	2.4	18.13	22.63	25.39	27.94	11.6267	25.32	1.1228	0.03683	0.131051
ENSSSCG00000040603	66	10	97	162	117	162	1.39	0.23	1.5	2.8	2.13	2.92	1.04	2.61667	1.3311	0.0369753	0.131291
ENSSSCG00000041731	311	67	688	779	1098	493	6.55	1.53	10.62	13.45	20.02	8.87	6.23333	14.1133	1.179	0.0373393	0.132069
ENSSSCG00000025357	194	35	255	336	441	304	4.09	0.8	3.94	5.8	8.04	5.47	2.94333	6.43667	1.1289	0.0374268	0.13219
ENSSSCG00000001982	33	16	63	19	7	16	0.7	0.37	0.97	0.33	0.13	0.29	0.68	0.25	-1.4436	0.0378622	0.133198
ENSSSCG00000001561	441	115	683	489	2025	523	9.29	2.63	10.54	8.44	36.91	9.41	7.48667	18.2533	1.2858	0.0385988	0.134949
ENSSSCG00000038250	39	21	68	94	67	126	0.82	0.48	1.05	1.62	1.22	2.27	0.783333	1.70333	1.1207	0.0387492	0.135095
ENSSSCG00000046700	130	16	260	360	292	347	2.74	0.37	4.01	6.21	5.32	6.25	2.37333	5.92667	1.3203	0.0388791	0.135472
ENSSSCG00000009157	821	87	2219	3311	4576	3737	17.3	1.99	34.25	57.15	83.42	67.27	17.8467	69.28	1.9568	0.0388987	0.135502
ENSSSCG00000023419	190	38	346	452	293	532	4	0.87	5.34	7.8	5.34	9.58	3.40333	7.57333	1.154	0.0389608	0.135642
ENSSSCG00000046648	1	2	8	8	25	28	0.02	0.05	0.12	0.14	0.46	0.5	0.0633333	0.366667	2.5334	0.0392754	0.135938
ENSSSCG00000022895	1220	293	2509	2019	3590	2494	25.7	6.7	38.72	34.85	65.44	44.89	23.7067	48.3933	1.0295	0.0395426	0.136309
ENSSSCG00000014242	121	33	326	334	293	418	2.55	0.75	5.03	5.76	5.34	7.52	2.77667	6.20667	1.1605	0.0398055	0.136731
ENSSSCG00000014093	805	266	172	377	146	48	16.96	6.09	2.65	6.51	2.66	0.86	8.56667	3.34333	-1.3574	0.0406999	0.138554
ENSSSCG00000040100	943	168	1822	2140	1891	2037	19.87	3.84	28.12	36.94	34.47	36.67	17.2767	36.0267	1.0602	0.0411549	0.13972
ENSSSCG00000012077	12486	2880	8738	16546	69590	15705	263.07	65.89	134.86	285.58	1268.55	282.69	154.607	612.273	1.9856	0.0414329	0.140362
ENSSSCG00000011393	2856	1524	3205	3300	10115	2830	60.17	34.87	49.47	56.96	184.39	50.94	48.17	97.43	1.0162	0.0414949	0.140452
ENSSSCG00000032592	56	43	118	22	46	42	1.18	0.98	1.82	0.38	0.84	0.76	1.32667	0.66	-1.0073	0.0417565	0.14103
ENSSSCG00000010911	754	105	1524	1883	1868	1490	15.89	2.4	23.52	32.5	34.05	26.82	13.9367	31.1233	1.1591	0.0418011	0.141065
ENSSSCG00000040162	702	515	698	1581	5884	593	14.79	11.78	10.77	27.29	107.26	10.67	12.4467	48.4067	1.9594	0.042356	0.14232
ENSSSCG00000013724	3	13	9	0	0	2	0.06	0.3	0.14	0	0	0.04	0.166667	0.0133333	-3.6439	0.042444	0.142462
ENSSSCG00000049415	10	0	16	32	38	42	0.21	0	0.25	0.55	0.69	0.76	0.153333	0.666667	2.1203	0.04283	0.143216
ENSSSCG00000027022	118	64	65	40	0	33	2.49	1.46	1	0.69	0	0.59	1.65	0.426667	-1.9513	0.0437313	0.144849
ENSSSCG00000049158	174	15	617	1026	1011	1269	3.67	0.34	9.52	17.71	18.43	22.84	4.51	19.66	2.1241	0.0437497	0.144849
ENSSSCG00000024759	30	18	76	102	75	95	0.63	0.41	1.17	1.76	1.37	1.71	0.736667	1.61333	1.131	0.0439945	0.145326
ENSSSCG00000040575	7755	1473	3737	10805	55712	7102	163.39	33.7	57.68	186.49	1015.57	127.84	84.9233	443.3	2.3841	0.0440684	0.145478
ENSSSCG00000000642	14	10	31	52	56	36	0.29	0.23	0.48	0.9	1.02	0.65	0.333333	0.856667	1.3618	0.0441417	0.145604
ENSSSCG00000009652	303	68	525	600	511	701	6.38	1.56	8.1	10.36	9.31	12.62	5.34667	10.7633	1.0094	0.0442288	0.145776
ENSSSCG00000003783	219	46	329	368	429	429	4.61	1.05	5.08	6.35	7.82	7.72	3.58	7.29667	1.0273	0.0446073	0.146432
ENSSSCG00000022701	9248	42103	32696	1880	741	14647	194.85	963.24	504.63	32.45	13.51	263.65	554.24	103.203	-2.425	0.045112	0.147281
ENSSSCG00000007007	376	134	910	306	285	87	7.92	3.07	14.04	5.28	5.2	1.57	8.34333	4.01667	-1.0546	0.0457268	0.148371
ENSSSCG00000009943	748	123	2166	3130	2967	3246	15.76	2.81	33.43	54.02	54.09	58.43	17.3333	55.5133	1.6793	0.0462682	0.149343
ENSSSCG00000023324	1111	147	3086	4993	4473	4781	23.41	3.36	47.63	86.18	81.54	86.06	24.8	84.5933	1.7702	0.0463043	0.149406
ENSSSCG00000000277	55	161	73	84	30	35	1.16	3.68	1.13	1.45	0.55	0.63	1.99	0.876667	-1.1827	0.0467079	0.150202
ENSSSCG00000017726	51	64	79	48	10	37	1.07	1.46	1.22	0.83	0.18	0.67	1.25	0.56	-1.1584	0.0470556	0.150964
ENSSSCG00000017508	48	31	44	32	15	13	1.01	0.71	0.68	0.55	0.27	0.23	0.8	0.35	-1.1926	0.0473874	0.151408
ENSSSCG00000037475	381	263	71	64	81	213	8.03	6.02	1.1	1.1	1.48	3.83	5.05	2.13667	-1.2409	0.0477551	0.152075
ENSSSCG00000050590	9	0	34	39	62	69	0.19	0	0.52	0.67	1.13	1.24	0.236667	1.01333	2.0982	0.0480606	0.152467
ENSSSCG00000011176	32	26	74	115	76	85	0.67	0.59	1.14	1.98	1.39	1.53	0.8	1.63333	1.0297	0.0481314	0.152531
ENSSSCG00000009348	490	98	1108	1371	1217	910	10.32	2.24	17.1	23.66	22.18	16.38	9.88667	20.74	1.0689	0.0482547	0.152704
ENSSSCG00000005971	269	61	549	621	541	605	5.67	1.4	8.47	10.72	9.86	10.89	5.18	10.49	1.018	0.0488092	0.153641
ENSSSCG00000011292	242	36	270	377	409	416	5.1	0.82	4.17	6.51	7.46	7.49	3.36333	7.15333	1.0887	0.0488433	0.153651
ENSSSCG00000021624	73	76	57	49	45	17	1.54	1.74	0.88	0.85	0.82	0.31	1.38667	0.66	-1.0711	0.0490578	0.154091
ENSSSCG00000039146	897	232	1106	2456	1551	715	18.9	5.31	17.07	42.39	28.27	12.87	13.76	27.8433	1.0169	0.0494003	0.154781

## Sheet: GF_MLN-vs-SPF_MLN
id	GF1_MLN	GF2_MLN	GF3_MLN	SPF1_MLN	SPF2_MLN	SPF3_MLN	GF1_MLN_CPM	GF2_MLN_CPM	GF3_MLN_CPM	SPF1_MLN_CPM	SPF2_MLN_CPM	SPF3_MLN_CPM	GF_MLN_mean	SPF_MLN_mean	log2(fc)	PValue	FDR
ENSSSCG00000008228	191	230	249	1006	895	607	5.43	4.09	4.4	16.69	18.06	17.56	4.64	17.4367	1.9099	1.5654e-30	1.94595e-26
ENSSSCG00000040042	17	31	39	294	314	168	0.48	0.55	0.69	4.88	6.33	4.86	0.573333	5.35667	3.2239	3.34913e-25	2.08165e-21
ENSSSCG00000006987	770	928	1112	356	368	197	21.88	16.5	19.66	5.91	7.42	5.7	19.3467	6.34333	-1.6088	5.90343e-16	2.44618e-12
ENSSSCG00000006172	2662	3864	3533	1816	1721	1003	75.65	68.71	62.46	30.13	34.72	29.01	68.94	31.2867	-1.1398	3.12207e-14	9.7026e-11
ENSSSCG00000016925	1593	2074	2723	1154	945	638	45.27	36.88	48.14	19.14	19.06	18.46	43.43	18.8867	-1.2013	8.11714e-14	2.01808e-10
ENSSSCG00000042208	548	724	1030	2478	1798	1221	15.57	12.87	18.21	41.11	36.27	35.32	15.55	37.5667	1.2725	1.78443e-13	3.47646e-10
ENSSSCG00000032123	178	136	121	0	4	0	5.06	2.42	2.14	0	0.08	0	3.20667	0.0266667	-6.9099	1.95763e-13	3.47646e-10
ENSSSCG00000004492	4119	7517	8389	3299	2612	1383	117.05	133.68	148.3	54.73	52.7	40.01	133.01	49.1467	-1.4364	2.53187e-13	3.93421e-10
ENSSSCG00000001422	3341	4801	3756	10712	10446	5733	94.94	85.38	66.4	177.7	210.74	165.84	82.24	184.76	1.1677	2.34775e-12	2.65317e-09
ENSSSCG00000016095	9582	13458	11739	4863	6129	3239	272.3	239.33	207.52	80.67	123.65	93.69	239.717	99.3367	-1.2709	5.12761e-11	4.55295e-08
ENSSSCG00000050172	3271	5845	4622	2409	2432	1442	92.96	103.94	81.71	39.96	49.06	41.71	92.87	43.5767	-1.0917	5.55274e-11	4.60174e-08
ENSSSCG00000034570	6007	4344	9442	49573	44282	12101	170.71	77.25	166.92	822.36	893.37	350.05	138.293	688.593	2.3159	6.07667e-11	4.72119e-08
ENSSSCG00000025711	650	874	877	325	377	257	18.47	15.54	15.5	5.39	7.61	7.43	16.5033	6.81	-1.277	2.64729e-10	1.82824e-07
ENSSSCG00000014917	693	966	1186	483	364	332	19.69	17.18	20.97	8.01	7.34	9.6	19.28	8.31667	-1.213	3.22799e-10	2.02357e-07
ENSSSCG00000036383	5582	4458	5868	17276	24389	10458	158.63	79.28	103.73	286.59	492.03	302.52	113.88	360.38	1.662	3.25569e-10	2.02357e-07
ENSSSCG00000003773	200	288	381	110	79	69	5.68	5.12	6.74	1.82	1.59	2	5.84667	1.80333	-1.6969	3.71326e-10	2.19807e-07
ENSSSCG00000014310	2428	3807	2998	11027	6141	4793	69	67.7	53	182.93	123.89	138.65	63.2333	148.49	1.2316	6.21883e-10	3.51392e-07
ENSSSCG00000040162	791	1528	2666	4858	7591	3630	22.48	27.17	47.13	80.59	153.14	105.01	32.26	112.913	1.8074	1.06558e-09	5.51925e-07
ENSSSCG00000026318	208	391	960	77	89	59	5.91	6.95	16.97	1.28	1.8	1.71	9.94333	1.59667	-2.6387	1.20711e-09	6.00221e-07
ENSSSCG00000012853	1528	1505	1523	4031	7180	3223	43.42	26.76	26.92	66.87	144.85	93.23	32.3667	101.65	1.651	2.18469e-09	1.00585e-06
ENSSSCG00000016313	288	325	344	817	677	536	8.18	5.78	6.08	13.55	13.66	15.5	6.68	14.2367	1.0917	2.89169e-09	1.28381e-06
ENSSSCG00000001504	686	1349	1182	3120	1876	1655	19.49	23.99	20.9	51.76	37.85	47.87	21.46	45.8267	1.0945	3.10663e-09	1.33167e-06
ENSSSCG00000039956	6	7	6	92	70	38	0.17	0.12	0.11	1.53	1.41	1.1	0.133333	1.34667	3.3363	3.27069e-09	1.35527e-06
ENSSSCG00000007909	479	411	732	177	166	61	13.61	7.31	12.94	2.94	3.35	1.76	11.2867	2.68333	-2.0725	3.57271e-09	1.43266e-06
ENSSSCG00000010523	574	902	664	335	317	218	16.31	16.04	11.74	5.56	6.4	6.31	14.6967	6.09	-1.271	5.98452e-09	2.3248e-06
ENSSSCG00000024973	8850	7848	8942	23934	22203	25601	251.5	139.56	158.08	397.04	447.93	740.56	183.047	528.51	1.5297	7.59658e-09	2.86161e-06
ENSSSCG00000003949	1200	1473	1364	3471	2412	2169	34.1	26.19	24.11	57.58	48.66	62.74	28.1333	56.3267	1.0015	1.0385e-08	3.4891e-06
ENSSSCG00000003901	120	339	180	49	35	33	3.41	6.03	3.18	0.81	0.71	0.95	4.20667	0.823333	-2.3531	1.07558e-08	3.51856e-06
ENSSSCG00000007157	464	869	592	304	224	186	13.19	15.45	10.47	5.04	4.52	5.38	13.0367	4.98	-1.3884	1.26368e-08	3.76138e-06
ENSSSCG00000006879	1290	1793	1783	768	926	587	36.66	31.89	31.52	12.74	18.68	16.98	33.3567	16.1333	-1.0479	1.42862e-08	4.03617e-06
ENSSSCG00000031741	2521	2512	2713	8125	4976	4592	71.64	44.67	47.96	134.79	100.39	132.83	54.7567	122.67	1.1637	2.02793e-08	5.60204e-06
ENSSSCG00000047189	995	1442	2064	3591	5867	2262	28.28	25.64	36.49	59.57	118.36	65.43	30.1367	81.12	1.4285	2.35484e-08	6.36369e-06
ENSSSCG00000009729	486	584	804	311	302	203	13.81	10.39	14.21	5.16	6.09	5.87	12.8033	5.70667	-1.1658	2.70487e-08	7.00505e-06
ENSSSCG00000039492	6	8	13	62	77	59	0.17	0.14	0.23	1.03	1.55	1.71	0.18	1.43	2.9899	3.33081e-08	8.28105e-06
ENSSSCG00000008262	905	1266	1424	523	690	332	25.72	22.51	25.17	8.68	13.92	9.6	24.4667	10.7333	-1.1887	4.32498e-08	1.03394e-05
ENSSSCG00000032383	112	191	215	49	50	42	3.18	3.4	3.8	0.81	1.01	1.21	3.46	1.01	-1.7764	4.32506e-08	1.03394e-05
ENSSSCG00000026517	459	1071	822	361	283	243	13.04	19.05	14.53	5.99	5.71	7.03	15.54	6.24333	-1.3156	4.85452e-08	1.13861e-05
ENSSSCG00000035226	1	0	1	56	52	45	0.03	0	0.02	0.93	1.05	1.3	0.0166667	1.09333	6.0356	5.59061e-08	1.28698e-05
ENSSSCG00000024867	252	103	182	700	1483	791	7.16	1.83	3.22	11.61	29.92	22.88	4.07	21.47	2.3992	7.8977e-08	1.64833e-05
ENSSSCG00000036787	671	891	2062	465	256	122	19.07	15.84	36.45	7.71	5.16	3.53	23.7867	5.46667	-2.1214	1.10584e-07	2.18202e-05
ENSSSCG00000016554	972	1416	990	549	571	329	27.62	25.18	17.5	9.11	11.52	9.52	23.4333	10.05	-1.2214	1.9217e-07	3.41266e-05
ENSSSCG00000031292	3266	5951	3283	12179	12112	5613	92.81	105.83	58.04	202.04	244.35	162.37	85.56	202.92	1.2459	1.97904e-07	3.4306e-05
ENSSSCG00000036941	297	790	586	178	208	149	8.44	14.05	10.36	2.95	4.2	4.31	10.95	3.82	-1.5193	2.02075e-07	3.44108e-05
ENSSSCG00000024892	231	521	466	120	172	61	6.56	9.27	8.24	1.99	3.47	1.76	8.02333	2.40667	-1.7372	2.42747e-07	3.97051e-05
ENSSSCG00000035297	2207	1604	3099	8367	14453	3422	62.72	28.52	54.78	138.8	291.58	98.99	48.6733	176.457	1.8581	3.65841e-07	5.83048e-05
ENSSSCG00000008978	60	62	67	195	222	288	1.71	1.1	1.18	3.23	4.48	8.33	1.33	5.34667	2.0072	4.33295e-07	6.64973e-05
ENSSSCG00000029576	1672	2196	2177	968	1263	652	47.51	39.05	38.49	16.06	25.48	18.86	41.6833	20.1333	-1.0499	5.01037e-07	7.32751e-05
ENSSSCG00000001513	874	1357	1727	578	734	462	24.84	24.13	30.53	9.59	14.81	13.36	26.5	12.5867	-1.0741	5.23494e-07	7.56692e-05
ENSSSCG00000017416	1751	1385	2224	5015	11567	3038	49.76	24.63	39.32	83.19	233.36	87.88	37.9033	134.81	1.8305	5.93676e-07	8.38634e-05
ENSSSCG00000032709	1673	3376	4199	1708	1514	1044	47.54	60.04	74.23	28.33	30.54	30.2	60.6033	29.69	-1.0294	6.44338e-07	8.76899e-05
ENSSSCG00000043909	1465	2293	1603	582	939	490	41.63	40.78	28.34	9.65	18.94	14.17	36.9167	14.2533	-1.373	6.44352e-07	8.76899e-05
ENSSSCG00000031037	862	743	1366	4531	1698	4369	24.5	13.21	24.15	75.16	34.26	126.38	20.62	78.6	1.9305	6.96073e-07	9.30418e-05
ENSSSCG00000030801	3695	4394	4020	7374	9856	7804	105	78.14	71.07	122.33	198.84	225.75	84.7367	182.307	1.1053	7.71531e-07	0.000100957
ENSSSCG00000017754	2427	2105	2752	6290	9724	3486	68.97	37.43	48.65	104.34	196.18	100.84	51.6833	133.787	1.3722	7.86137e-07	0.000101797
ENSSSCG00000038912	5867	6860	7544	19002	23800	7398	166.73	121.99	133.36	315.22	480.15	214	140.693	336.457	1.2579	8.457e-07	0.000107274
ENSSSCG00000037913	1057	1123	2331	3909	3439	5226	30.04	19.97	41.21	64.85	69.38	151.17	30.4067	95.1333	1.6456	8.66242e-07	0.00010877
ENSSSCG00000002955	727	888	939	271	466	187	20.66	15.79	16.6	4.5	9.4	5.41	17.6833	6.43667	-1.458	9.6663e-07	0.000118972
ENSSSCG00000009666	803	1721	1734	717	594	547	22.82	30.6	30.65	11.89	11.98	15.82	28.0233	13.23	-1.0828	9.99891e-07	0.000121321
ENSSSCG00000014565	8206	12999	9252	25268	30592	11591	233.2	231.16	163.56	419.17	617.18	335.29	209.307	457.213	1.1272	1.00523e-06	0.000121321
ENSSSCG00000002313	1296	1928	1248	491	779	336	36.83	34.29	22.06	8.15	15.72	9.72	31.06	11.1967	-1.472	1.04279e-06	0.000123758
ENSSSCG00000039740	2214	1769	3821	6184	6482	5470	62.92	31.46	67.55	102.59	130.77	158.23	53.9767	130.53	1.274	1.14004e-06	0.000130017
ENSSSCG00000008899	222	311	225	110	102	66	6.31	5.53	3.98	1.82	2.06	1.91	5.27333	1.93	-1.4501	1.44157e-06	0.000157195
ENSSSCG00000023806	225	189	402	81	71	69	6.39	3.36	7.11	1.34	1.43	2	5.62	1.59	-1.8215	1.51755e-06	0.00016404
ENSSSCG00000026533	39	93	120	15	10	12	1.11	1.65	2.12	0.25	0.2	0.35	1.62667	0.266667	-2.6088	1.67354e-06	0.000176303
ENSSSCG00000003763	2149	1686	2586	5311	11325	3543	61.07	29.98	45.72	88.1	228.48	102.49	45.59	139.69	1.6154	1.81464e-06	0.000189561
ENSSSCG00000032474	2864	2722	5206	6679	11485	7856	81.39	48.41	92.03	110.8	231.7	227.25	73.9433	189.917	1.3609	1.97825e-06	0.000203236
ENSSSCG00000000665	689	752	868	290	387	273	19.58	13.37	15.34	4.81	7.81	7.9	16.0967	6.84	-1.2347	2.04264e-06	0.000208131
ENSSSCG00000023379	3397	4417	3590	7587	12587	5364	96.54	78.55	63.46	125.86	253.94	155.16	79.5167	178.32	1.1651	2.31947e-06	0.000234417
ENSSSCG00000010239	970	1036	1277	437	549	415	27.57	18.42	22.57	7.25	11.08	12	22.8533	10.11	-1.1766	2.35315e-06	0.000235341
ENSSSCG00000002783	424	580	561	239	301	183	12.05	10.31	9.92	3.96	6.07	5.29	10.76	5.10667	-1.0752	3.49129e-06	0.000328789
ENSSSCG00000028567	437	1118	1015	470	275	141	12.42	19.88	17.94	7.8	5.55	4.08	16.7467	5.81	-1.5273	3.98102e-06	0.000366578
ENSSSCG00000035595	1146	1182	1999	653	768	491	32.57	21.02	35.34	10.83	15.49	14.2	29.6433	13.5067	-1.134	4.51942e-06	0.000407108
ENSSSCG00000003192	4155	5970	5085	13108	7250	9293	118.08	106.17	89.89	217.45	146.26	268.82	104.713	210.843	1.0097	4.68611e-06	0.000416093
ENSSSCG00000044079	100	132	102	411	316	152	2.84	2.35	1.8	6.82	6.38	4.4	2.33	5.86667	1.3322	4.74788e-06	0.000418588
ENSSSCG00000017567	407	457	710	259	279	133	11.57	8.13	12.55	4.3	5.63	3.85	10.75	4.59333	-1.2267	5.7305e-06	0.000484597
ENSSSCG00000003894	87	281	61	31	12	6	2.47	5	1.08	0.51	0.24	0.17	2.85	0.306667	-3.2162	6.3417e-06	0.000515253
ENSSSCG00000000419	347	723	395	214	153	152	9.86	12.86	6.98	3.55	3.09	4.4	9.9	3.68	-1.4277	6.58971e-06	0.000525107
ENSSSCG00000026850	339	717	1045	359	230	175	9.63	12.75	18.47	5.96	4.64	5.06	13.6167	5.22	-1.3833	6.80965e-06	0.000537953
ENSSSCG00000013266	205	277	455	141	141	72	5.83	4.93	8.04	2.34	2.84	2.08	6.26667	2.42	-1.3727	7.61091e-06	0.000573401
ENSSSCG00000003709	4559	4794	4001	2539	2415	1559	129.56	85.25	70.73	42.12	48.72	45.1	95.18	45.3133	-1.0707	7.92019e-06	0.000582579
ENSSSCG00000000688	625	834	444	1797	1489	1121	17.76	14.83	7.85	29.81	30.04	32.43	13.48	30.76	1.1902	8.38243e-06	0.000609368
ENSSSCG00000010452	2157	2924	4978	5831	17255	6020	61.3	52	88	96.73	348.11	174.14	67.1	206.327	1.6205	8.51087e-06	0.000615108
ENSSSCG00000028341	851	933	665	288	246	295	24.18	16.59	11.76	4.78	4.96	8.53	17.51	6.09	-1.5237	8.94596e-06	0.00062179
ENSSSCG00000006542	433	486	1020	291	234	193	12.3	8.64	18.03	4.83	4.72	5.58	12.99	5.04333	-1.365	9.16342e-06	0.000626701
ENSSSCG00000010300	887	1096	1155	198	507	272	25.21	19.49	20.42	3.28	10.23	7.87	21.7067	7.12667	-1.6068	9.3913e-06	0.000637941
ENSSSCG00000015268	417	1078	975	377	424	220	11.85	19.17	17.24	6.25	8.55	6.36	16.0867	7.05333	-1.1895	9.69103e-06	0.000654724
ENSSSCG00000043817	1061	867	933	416	498	245	30.15	15.42	16.49	6.9	10.05	7.09	20.6867	8.01333	-1.3682	1.03119e-05	0.00067602
ENSSSCG00000000680	351	631	470	307	202	119	9.97	11.22	8.31	5.09	4.08	3.44	9.83333	4.20333	-1.2261	1.03325e-05	0.00067602
ENSSSCG00000016057	22459	18400	26129	41988	56730	38941	638.24	327.21	461.91	696.54	1144.5	1126.45	475.787	989.163	1.0559	1.09813e-05	0.000714702
ENSSSCG00000017700	133	179	261	438	339	325	3.78	3.18	4.61	7.27	6.84	9.4	3.85667	7.83667	1.0229	1.21912e-05	0.000777172
ENSSSCG00000012845	84	119	106	284	196	161	2.39	2.12	1.87	4.71	3.95	4.66	2.12667	4.44	1.062	1.30542e-05	0.000819581
ENSSSCG00000033326	65939	137162	62359	48820	34804	26578	1873.86	2439.17	1102.38	809.87	702.15	768.82	1805.14	760.28	-1.2475	1.32652e-05	0.000828642
ENSSSCG00000001234	130	197	310	80	73	63	3.69	3.5	5.48	1.33	1.47	1.82	4.22333	1.54	-1.4555	1.38085e-05	0.000834574
ENSSSCG00000007423	1425	1739	1289	4094	2435	2502	40.5	30.92	22.79	67.92	49.12	72.38	31.4033	63.14	1.0076	1.38736e-05	0.000834574
ENSSSCG00000000297	1069	1241	1207	573	716	444	30.38	22.07	21.34	9.51	14.44	12.84	24.5967	12.2633	-1.0041	1.44473e-05	0.000859303
ENSSSCG00000026924	1185	1594	1283	483	783	453	33.68	28.35	22.68	8.01	15.8	13.1	28.2367	12.3033	-1.1985	1.56284e-05	0.000916401
ENSSSCG00000038829	823	1267	858	281	533	271	23.39	22.53	15.17	4.66	10.75	7.84	20.3633	7.75	-1.3937	1.67591e-05	0.000964501
ENSSSCG00000006361	1108	2213	1233	888	684	494	31.49	39.35	21.8	14.73	13.8	14.29	30.88	14.2733	-1.1134	1.76859e-05	0.000999335
ENSSSCG00000040575	1074	766	1997	5947	16342	4066	30.52	13.62	35.3	98.65	329.69	117.62	26.48	181.987	2.7809	1.819e-05	0.00102317
ENSSSCG00000024325	80	190	108	25	3	18	2.27	3.38	1.91	0.41	0.06	0.52	2.52	0.33	-2.9329	1.86239e-05	0.00103354
ENSSSCG00000011280	196	152	200	79	66	41	5.57	2.7	3.54	1.31	1.33	1.19	3.93667	1.27667	-1.6246	2.36064e-05	0.00123299
ENSSSCG00000046358	2230	2397	2638	1131	1594	849	63.37	42.63	46.63	18.76	32.16	24.56	50.8767	25.16	-1.0159	2.99307e-05	0.00145909
ENSSSCG00000029408	3745	3256	3706	1568	1822	1444	106.43	57.9	65.51	26.01	36.76	41.77	76.6133	34.8467	-1.1366	3.13073e-05	0.00150263
ENSSSCG00000015707	48	276	85	18	27	13	1.36	4.91	1.5	0.3	0.54	0.38	2.59	0.406667	-2.671	3.20967e-05	0.00152288
ENSSSCG00000023178	254	259	293	440	997	653	7.22	4.61	5.18	7.3	20.11	18.89	5.67	15.4333	1.4446	3.33591e-05	0.00157078
ENSSSCG00000030108	5484	4501	7188	10233	27321	9552	155.84	80.04	127.07	169.75	551.19	276.31	120.983	332.417	1.4582	3.46979e-05	0.00162154
ENSSSCG00000016426	518	788	783	348	461	195	14.72	14.01	13.84	5.77	9.3	5.64	14.19	6.90333	-1.0395	3.49155e-05	0.0016256
ENSSSCG00000037347	187	289	249	91	16	6	5.31	5.14	4.4	1.51	0.32	0.17	4.95	0.666667	-2.8924	3.85287e-05	0.00173533
ENSSSCG00000002277	46	83	84	24	12	13	1.31	1.48	1.48	0.4	0.24	0.38	1.42333	0.34	-2.0657	3.92634e-05	0.00175569
ENSSSCG00000030408	1942	1600	2615	3413	10414	3809	55.19	28.45	46.23	56.62	210.1	110.18	43.29	125.633	1.5371	4.23076e-05	0.00186499
ENSSSCG00000012077	3268	2362	3913	14513	38273	8371	92.87	42	69.17	240.76	772.14	242.15	68.0133	418.35	2.6208	4.42331e-05	0.00193613
ENSSSCG00000040513	903	987	1962	3124	2054	3423	25.66	17.55	34.68	51.82	41.44	99.02	25.9633	64.0933	1.3037	5.43073e-05	0.00225031
ENSSSCG00000004013	559	478	1479	356	269	208	15.89	8.5	26.15	5.91	5.43	6.02	16.8467	5.78667	-1.5417	5.74443e-05	0.00235673
ENSSSCG00000022312	188	235	263	389	726	365	5.34	4.18	4.65	6.45	14.65	10.56	4.72333	10.5533	1.1598	5.82562e-05	0.00236079
ENSSSCG00000000774	1587	1384	1792	3168	6600	2156	45.1	24.61	31.68	52.55	133.15	62.37	33.7967	82.69	1.2908	5.95885e-05	0.0023895
ENSSSCG00000011496	1299	1052	2000	853	741	425	36.91	18.71	35.36	14.15	14.95	12.29	30.3267	13.7967	-1.1363	6.02238e-05	0.00240435
ENSSSCG00000033114	1760	1229	4069	8325	12213	17405	50.02	21.86	71.93	138.1	246.39	503.48	47.9367	295.99	2.6263	6.12415e-05	0.0024245
ENSSSCG00000013512	605	1800	1162	642	345	376	17.19	32.01	20.54	10.65	6.96	10.88	23.2467	9.49667	-1.2915	6.17469e-05	0.00243675
ENSSSCG00000009500	148	283	213	126	74	58	4.21	5.03	3.77	2.09	1.49	1.68	4.33667	1.75333	-1.3065	6.50217e-05	0.00254178
ENSSSCG00000000663	685	941	815	429	448	129	19.47	16.73	14.41	7.12	9.04	3.73	16.87	6.63	-1.3474	6.61116e-05	0.00257192
ENSSSCG00000014933	674	737	982	591	356	265	19.15	13.11	17.36	9.8	7.18	7.67	16.54	8.21667	-1.0093	6.83077e-05	0.0026047
ENSSSCG00000011806	47	80	119	199	267	119	1.34	1.42	2.1	3.3	5.39	3.44	1.62	4.04333	1.3196	6.92135e-05	0.00261598
ENSSSCG00000028464	1237	1635	1959	4564	4385	1358	35.15	29.08	34.63	75.71	88.46	39.28	32.9533	67.8167	1.0412	6.96666e-05	0.00261828
ENSSSCG00000040942	121	325	169	451	458	454	3.44	5.78	2.99	7.48	9.24	13.13	4.07	9.95	1.2897	7.4209e-05	0.00275759
ENSSSCG00000035402	304	248	694	177	138	103	8.64	4.41	12.27	2.94	2.78	2.98	8.44	2.9	-1.5412	7.5743e-05	0.00279395
ENSSSCG00000003006	695	231	639	215	115	102	19.75	4.11	11.3	3.57	2.32	2.95	11.72	2.94667	-1.9918	7.78815e-05	0.00284749
ENSSSCG00000026473	2501	2869	3945	1246	1510	1433	71.07	51.02	69.74	20.67	30.46	41.45	63.9433	30.86	-1.0511	7.90475e-05	0.00286484
ENSSSCG00000011874	4186	4242	4915	6931	13034	6797	118.96	75.44	86.89	114.98	262.95	196.62	93.7633	191.517	1.0304	7.94475e-05	0.00287096
ENSSSCG00000036274	274	532	710	321	196	129	7.79	9.46	12.55	5.33	3.95	3.73	9.93333	4.33667	-1.1957	8.8016e-05	0.00314404
ENSSSCG00000037991	160	225	216	53	74	73	4.55	4	3.82	0.88	1.49	2.11	4.12333	1.49333	-1.4653	0.000101754	0.00350389
ENSSSCG00000026689	979	1837	992	246	680	293	27.82	32.67	17.54	4.08	13.72	8.48	26.01	8.76	-1.5701	0.000109593	0.00373246
ENSSSCG00000016903	562	735	866	1367	1198	1987	15.97	13.07	15.31	22.68	24.17	57.48	14.7833	34.7767	1.2341	0.000112782	0.00380689
ENSSSCG00000003024	283	415	291	120	166	116	8.04	7.38	5.14	1.99	3.35	3.36	6.85333	2.9	-1.2408	0.000113003	0.00380689
ENSSSCG00000039103	1744	4547	2867	1491	800	1189	49.56	80.86	50.68	24.73	16.14	34.39	60.3667	25.0867	-1.2668	0.000113344	0.00380719
ENSSSCG00000035210	116	108	186	46	52	39	3.3	1.92	3.29	0.76	1.05	1.13	2.83667	0.98	-1.5333	0.000115181	0.00383866
ENSSSCG00000047654	264	675	666	161	285	141	7.5	12	11.77	2.67	5.75	4.08	10.4233	4.16667	-1.3229	0.000119179	0.00391852
ENSSSCG00000002386	561	2854	2249	811	683	356	15.94	50.75	39.76	13.45	13.78	10.3	35.4833	12.51	-1.5041	0.000125139	0.00405106
ENSSSCG00000010865	391	360	428	777	746	798	11.11	6.4	7.57	12.89	15.05	23.08	8.36	17.0067	1.0245	0.000130218	0.00415062
ENSSSCG00000005710	225	565	87	56	49	57	6.39	10.05	1.54	0.93	0.99	1.65	5.99333	1.19	-2.3324	0.000132945	0.00419542
ENSSSCG00000009542	666	1014	772	1198	2011	1440	18.93	18.03	13.65	19.87	40.57	41.65	16.87	34.03	1.0123	0.000138182	0.0043051
ENSSSCG00000022483	28	26	47	96	117	68	0.8	0.46	0.83	1.59	2.36	1.97	0.696667	1.97333	1.5021	0.000151923	0.00462882
ENSSSCG00000027101	730	613	1022	336	364	325	20.75	10.9	18.07	5.57	7.34	9.4	16.5733	7.43667	-1.1561	0.000157738	0.00471356
ENSSSCG00000033649	720	916	687	275	483	231	20.46	16.29	12.14	4.56	9.74	6.68	16.2967	6.99333	-1.2205	0.000160504	0.00475053
ENSSSCG00000037594	9246	9657	11239	3600	6340	3934	262.75	171.73	198.68	59.72	127.91	113.8	211.053	100.477	-1.0707	0.000161127	0.00475765
ENSSSCG00000032436	890	677	1294	2282	2948	1086	25.29	12.04	22.88	37.86	59.47	31.41	20.07	42.9133	1.0964	0.000163035	0.00477992
ENSSSCG00000024569	804	1626	1418	551	871	383	22.85	28.92	25.07	9.14	17.57	11.08	25.6133	12.5967	-1.0239	0.000165001	0.004806
ENSSSCG00000039633	1976	3487	4571	1275	1857	1391	56.15	62.01	80.81	21.15	37.46	40.24	66.3233	32.95	-1.0092	0.00016777	0.00485771
ENSSSCG00000002268	1690	1657	3263	1076	1245	828	48.03	29.47	57.68	17.85	25.12	23.95	45.06	22.3067	-1.0144	0.000185767	0.00520106
ENSSSCG00000002935	1060	1087	1275	378	668	432	30.12	19.33	22.54	6.27	13.48	12.5	23.9967	10.75	-1.1585	0.00018829	0.00525984
ENSSSCG00000002633	940	862	716	385	485	264	26.71	15.33	12.66	6.39	9.78	7.64	18.2333	7.93667	-1.2	0.000196729	0.00545879
ENSSSCG00000006796	389	679	294	236	193	100	11.05	12.07	5.2	3.91	3.89	2.89	9.44	3.56333	-1.4056	0.000200421	0.00554884
ENSSSCG00000040648	96	244	247	217	774	815	2.73	4.34	4.37	3.6	15.62	23.58	3.81333	14.2667	1.9035	0.000210069	0.00571416
ENSSSCG00000037475	151	368	469	176	128	89	4.29	6.54	8.29	2.92	2.58	2.57	6.37333	2.69	-1.2444	0.000214552	0.00580154
ENSSSCG00000011768	1836	1441	2050	240	959	393	52.18	25.63	36.24	3.98	19.35	11.37	38.0167	11.5667	-1.7167	0.000218255	0.0058853
ENSSSCG00000011553	1800	1775	2316	537	1148	700	51.15	31.57	40.94	8.91	23.16	20.25	41.22	17.44	-1.2409	0.000242241	0.00635296
ENSSSCG00000003282	413	616	740	231	357	232	11.74	10.95	13.08	3.83	7.2	6.71	11.9233	5.91333	-1.0117	0.000246145	0.00642822
ENSSSCG00000014725	3996	15960	14618	4539	5938	1793	113.56	283.82	258.42	75.3	119.8	51.87	218.6	82.3233	-1.4089	0.000248148	0.00646694
ENSSSCG00000012586	1251	1152	1602	402	659	558	35.55	20.49	28.32	6.67	13.29	16.14	28.12	12.0333	-1.2246	0.000268954	0.00690923
ENSSSCG00000029352	9693	11108	11972	4039	7427	4196	275.46	197.53	211.64	67	149.84	121.38	228.21	112.74	-1.0174	0.000279621	0.00710094
ENSSSCG00000016902	43	128	117	298	483	2373	1.22	2.28	2.07	4.94	9.74	68.64	1.85667	27.7733	3.9029	0.00029354	0.00738663
ENSSSCG00000030548	976	735	1081	2846	7941	1872	27.74	13.07	19.11	47.21	160.21	54.15	19.9733	87.19	2.1261	0.00031824	0.00777217
ENSSSCG00000032950	395	696	379	290	104	142	11.23	12.38	6.7	4.81	2.1	4.11	10.1033	3.67333	-1.4597	0.000323175	0.00787723
ENSSSCG00000033858	837	1902	507	474	383	264	23.79	33.82	8.96	7.86	7.73	7.64	22.19	7.74333	-1.5189	0.000334456	0.00808875
ENSSSCG00000029267	739	435	906	2020	1396	1064	21	7.74	16.02	33.51	28.16	30.78	14.92	30.8167	1.0465	0.000340592	0.00816825
ENSSSCG00000015897	2024	1875	2715	3432	7209	2979	57.52	33.34	48	56.93	145.44	86.17	46.2867	96.18	1.0551	0.000348017	0.0082719
ENSSSCG00000017121	419	648	453	245	329	162	11.91	11.52	8.01	4.06	6.64	4.69	10.48	5.13	-1.0306	0.000349774	0.0082978
ENSSSCG00000011681	439	470	564	170	299	174	12.48	8.36	9.97	2.82	6.03	5.03	10.27	4.62667	-1.1504	0.000361695	0.00848347
ENSSSCG00000022635	157	236	184	121	83	64	4.46	4.2	3.25	2.01	1.67	1.85	3.97	1.84333	-1.1068	0.000380206	0.00879115
ENSSSCG00000038719	24509	16084	50907	106997	84831	135470	696.5	286.02	899.93	1774.97	1711.42	3918.75	627.483	2468.38	1.9759	0.00040027	0.00916346
ENSSSCG00000017951	136	224	226	344	332	405	3.86	3.98	4	5.71	6.7	11.72	3.94667	8.04333	1.0272	0.000420278	0.00948312
ENSSSCG00000012264	1740	1723	2048	510	1098	681	49.45	30.64	36.2	8.46	22.15	19.7	38.7633	16.77	-1.2088	0.000429328	0.00961618
ENSSSCG00000012152	295	352	304	162	174	130	8.38	6.26	5.37	2.69	3.51	3.76	6.67	3.32	-1.0065	0.000436457	0.00968856
ENSSSCG00000034802	440	244	623	837	2309	695	12.5	4.34	11.01	13.88	46.58	20.1	9.28333	26.8533	1.5324	0.000456529	0.0100444
ENSSSCG00000011951	2502	2089	2842	923	1520	980	71.1	37.15	50.24	15.31	30.67	28.35	52.83	24.7767	-1.0924	0.00046844	0.0102341
ENSSSCG00000030857	15019	16882	17587	5446	11435	6058	426.81	300.21	310.9	90.34	230.69	175.24	345.973	165.423	-1.0645	0.000555686	0.0115708
ENSSSCG00000014434	527	563	708	209	403	184	14.98	10.01	12.52	3.47	8.13	5.32	12.5033	5.64	-1.1485	0.000562366	0.0116707
ENSSSCG00000028699	211	347	559	122	198	122	6	6.17	9.88	2.02	3.99	3.53	7.35	3.18	-1.2087	0.000645415	0.0129825
ENSSSCG00000035420	525	745	666	1298	2269	592	14.92	13.25	11.77	21.53	45.78	17.12	13.3133	28.1433	1.0799	0.00064863	0.013005
ENSSSCG00000008003	163	360	343	198	120	89	4.63	6.4	6.06	3.28	2.42	2.57	5.69667	2.75667	-1.0472	0.000665773	0.0131577
ENSSSCG00000016915	702	550	2144	228	479	293	19.95	9.78	37.9	3.78	9.66	8.48	22.5433	7.30667	-1.6254	0.000674781	0.0132725
ENSSSCG00000013848	293	831	967	158	53	237	8.33	14.78	17.09	2.62	1.07	6.86	13.4	3.51667	-1.93	0.000694144	0.0135659
ENSSSCG00000004662	79	91	82	32	33	25	2.25	1.62	1.45	0.53	0.67	0.72	1.77333	0.64	-1.4703	0.000707744	0.0137341
ENSSSCG00000025306	270	258	511	168	173	126	7.67	4.59	9.03	2.79	3.49	3.64	7.09667	3.30667	-1.1018	0.000712956	0.0137834
ENSSSCG00000040681	2033	9391	3995	2900	1702	1179	57.77	167	70.62	48.11	34.34	34.1	98.4633	38.85	-1.3417	0.000718757	0.0138525
ENSSSCG00000004701	720	638	841	303	441	300	20.46	11.35	14.87	5.03	8.9	8.68	15.56	7.53667	-1.0458	0.000721775	0.0138891
ENSSSCG00000000667	248	60	171	550	726	409	7.05	1.07	3.02	9.12	14.65	11.83	3.71333	11.8667	1.6761	0.000727006	0.0139466
ENSSSCG00000011767	3247	2366	3938	757	1831	1122	92.27	42.07	69.62	12.56	36.94	32.46	67.9867	27.32	-1.3153	0.000768905	0.0144684
ENSSSCG00000033735	151	250	522	955	579	370	4.29	4.45	9.23	15.84	11.68	10.7	5.99	12.74	1.0887	0.000784973	0.0146737
ENSSSCG00000033000	314	605	417	221	126	195	8.92	10.76	7.37	3.67	2.54	5.64	9.01667	3.95	-1.1907	0.000792731	0.0147965
ENSSSCG00000011872	394	1543	1825	702	452	220	11.2	27.44	32.26	11.65	9.12	6.36	23.6333	9.04333	-1.3859	0.000832386	0.0153295
ENSSSCG00000003830	3020	2911	4196	1267	2249	1359	85.82	51.77	74.18	21.02	45.37	39.31	70.59	35.2333	-1.0025	0.000836629	0.0153848
ENSSSCG00000023320	472	428	265	1152	639	1030	13.41	7.61	4.68	19.11	12.89	29.79	8.56667	20.5967	1.2656	0.000858874	0.015688
ENSSSCG00000010479	135	238	89	71	48	14	3.84	4.23	1.57	1.18	0.97	0.4	3.21333	0.85	-1.9185	0.000863054	0.015688
ENSSSCG00000034348	799	689	1096	357	587	273	22.71	12.25	19.38	5.92	11.84	7.9	18.1133	8.55333	-1.0825	0.000872409	0.0158089
ENSSSCG00000027232	371	313	306	185	175	57	10.54	5.57	5.41	3.07	3.53	1.65	7.17333	2.75	-1.3832	0.000892628	0.0161187
ENSSSCG00000001982	132	88	116	57	15	22	3.75	1.56	2.05	0.95	0.3	0.64	2.45333	0.63	-1.9613	0.00100617	0.0174688
ENSSSCG00000029239	2441	2270	4397	6552	3882	7166	69.37	40.37	77.73	108.69	78.32	207.29	62.49	131.433	1.0726	0.00100876	0.0174895
ENSSSCG00000035066	237	336	97	89	37	59	6.74	5.98	1.71	1.48	0.75	1.71	4.81	1.31333	-1.8728	0.0010441	0.0180017
ENSSSCG00000011640	342	85	90	59	35	27	9.72	1.51	1.59	0.98	0.71	0.78	4.27333	0.823333	-2.3758	0.00104847	0.018052
ENSSSCG00000010454	1888	1775	3400	3549	7574	2927	53.65	31.57	60.11	58.87	152.8	84.67	48.4433	98.78	1.0279	0.0010637	0.0181633
ENSSSCG00000023082	60	194	132	59	39	34	1.71	3.45	2.33	0.98	0.79	0.98	2.49667	0.916667	-1.4455	0.00109644	0.01862
ENSSSCG00000040134	206	148	425	693	415	631	5.85	2.63	7.51	11.5	8.37	18.25	5.33	12.7067	1.2534	0.00110419	0.0187006
ENSSSCG00000012403	23429	20278	25505	8292	15534	9315	665.81	360.61	450.88	137.56	313.39	269.46	492.433	240.137	-1.0361	0.00111811	0.0187194
ENSSSCG00000016472	115	179	191	71	100	36	3.27	3.18	3.38	1.18	2.02	1.04	3.27667	1.41333	-1.2131	0.00111886	0.0187194
ENSSSCG00000041745	272	412	179	112	148	81	7.73	7.33	3.16	1.86	2.99	2.34	6.07333	2.39667	-1.3415	0.00121719	0.0197017
ENSSSCG00000040348	63	104	104	46	30	30	1.79	1.85	1.84	0.76	0.61	0.87	1.82667	0.746667	-1.2907	0.00127085	0.0203058
ENSSSCG00000044695	464	1165	683	309	426	307	13.19	20.72	12.07	5.13	8.59	8.88	15.3267	7.53333	-1.0247	0.00131506	0.0207476
ENSSSCG00000005360	386	233	209	775	833	442	10.97	4.14	3.69	12.86	16.81	12.79	6.26667	14.1533	1.1754	0.00132158	0.0207476
ENSSSCG00000016672	276	129	436	101	121	69	7.84	2.29	7.71	1.68	2.44	2	5.94667	2.04	-1.5435	0.00133845	0.0207943
ENSSSCG00000038507	22313	51120	15918	16975	12120	9662	634.09	909.07	281.4	281.6	244.51	279.49	608.187	268.533	-1.1794	0.00134372	0.0208276
ENSSSCG00000010451	1480	2043	3218	2666	7625	3193	42.06	36.33	56.89	44.23	153.83	92.36	45.0933	96.8067	1.1022	0.00135259	0.0208612
ENSSSCG00000039412	811	1481	1926	1147	597	337	23.05	26.34	34.05	19.03	12.04	9.75	27.8133	13.6067	-1.0315	0.00138253	0.0211914
ENSSSCG00000032652	350	349	519	548	1253	615	9.95	6.21	9.17	9.09	25.28	17.79	8.44333	17.3867	1.0421	0.00140835	0.0214719
ENSSSCG00000001672	273	303	264	144	176	53	7.76	5.39	4.67	2.39	3.55	1.53	5.94	2.49	-1.2543	0.00146217	0.0217941
ENSSSCG00000000443	103	175	129	65	64	52	2.93	3.11	2.28	1.08	1.29	1.5	2.77333	1.29	-1.1042	0.00152546	0.0224414
ENSSSCG00000038489	531	380	1090	1383	1034	1980	15.09	6.76	19.27	22.94	20.86	57.28	13.7067	33.6933	1.2976	0.00159562	0.0230965
ENSSSCG00000017068	1304	703	1012	486	611	284	37.06	12.5	17.89	8.06	12.33	8.22	22.4833	9.53667	-1.2373	0.001726	0.0243274
ENSSSCG00000010505	57	56	59	104	369	85	1.62	1	1.04	1.73	7.44	2.46	1.22	3.87667	1.6679	0.00183503	0.0252058
ENSSSCG00000001625	62	46	0	0	2	0	1.76	0.82	0	0	0.04	0	0.86	0.0133333	-6.0112	0.00186141	0.0254557
ENSSSCG00000036983	2417	680	7778	20389	20234	22495	68.69	12.09	137.5	338.23	408.21	650.71	72.76	465.717	2.6782	0.00191048	0.0259554
ENSSSCG00000010428	112	113	143	75	55	39	3.18	2.01	2.53	1.24	1.11	1.13	2.57333	1.16	-1.1495	0.00196095	0.0264179
ENSSSCG00000040651	611	180	635	1688	2021	2823	17.36	3.2	11.23	28	40.77	81.66	10.5967	50.1433	2.2424	0.00196153	0.0264179
ENSSSCG00000001844	1025	3599	1193	1049	531	636	29.13	64	21.09	17.4	10.71	18.4	38.0733	15.5033	-1.2962	0.00209549	0.0276823
ENSSSCG00000007508	1718	1156	2327	4002	10755	3235	48.82	20.56	41.14	66.39	216.98	93.58	36.84	125.65	1.7701	0.00219991	0.0285459
ENSSSCG00000006455	22888	12712	27180	31194	49188	47345	650.43	226.06	480.49	517.48	992.34	1369.55	452.327	959.79	1.0854	0.00222444	0.028655
ENSSSCG00000012525	74	181	98	49	41	40	2.1	3.22	1.73	0.81	0.83	1.16	2.35	0.933333	-1.3322	0.00232033	0.0294627
ENSSSCG00000016943	1147	933	1188	314	777	340	32.6	16.59	21	5.21	15.68	9.84	23.3967	10.2433	-1.1916	0.00257489	0.0316289
ENSSSCG00000037533	16	31	38	98	41	95	0.45	0.55	0.67	1.63	0.83	2.75	0.556667	1.73667	1.6414	0.00263651	0.0321318
ENSSSCG00000012376	1271	700	1062	678	392	372	36.12	12.45	18.77	11.25	7.91	10.76	22.4467	9.97333	-1.1704	0.00267807	0.0325108
ENSSSCG00000006458	767	452	809	336	421	219	21.8	8.04	14.3	5.57	8.49	6.34	14.7133	6.8	-1.1135	0.00272013	0.0328261
ENSSSCG00000040752	88	140	217	89	70	41	2.5	2.49	3.84	1.48	1.41	1.19	2.94333	1.36	-1.1138	0.00280885	0.0334773
ENSSSCG00000035148	769	666	684	279	496	251	21.85	11.84	12.09	4.63	10.01	7.26	15.26	7.3	-1.0638	0.00283272	0.0336677
ENSSSCG00000009087	19	15	41	83	69	48	0.54	0.27	0.72	1.38	1.39	1.39	0.51	1.38667	1.4431	0.00290126	0.0341144
ENSSSCG00000032578	253	310	859	963	613	1512	7.19	5.51	15.19	15.98	12.37	43.74	9.29667	24.03	1.3701	0.00307131	0.0351083
ENSSSCG00000015294	1993	1529	1630	1317	1009	466	56.64	27.19	28.82	21.85	20.36	13.48	37.55	18.5633	-1.0164	0.0030932	0.0352443
ENSSSCG00000000182	539	540	410	339	170	207	15.32	9.6	7.25	5.62	3.43	5.99	10.7233	5.01333	-1.0969	0.00347606	0.0382736
ENSSSCG00000015284	7153	5257	8602	2631	5076	2684	203.27	93.49	152.07	43.65	102.41	77.64	149.61	74.5667	-1.0046	0.00354938	0.0389086
ENSSSCG00000035594	757	844	1110	293	643	351	21.51	15.01	19.62	4.86	12.97	10.15	18.7133	9.32667	-1.0046	0.00367983	0.0398814
ENSSSCG00000036454	96	150	152	94	54	46	2.73	2.67	2.69	1.56	1.09	1.33	2.69667	1.32667	-1.0234	0.00369919	0.0400163
ENSSSCG00000011557	495	2012	507	525	248	283	14.07	35.78	8.96	8.71	5	8.19	19.6033	7.3	-1.4251	0.00375669	0.040443
ENSSSCG00000006748	129	301	248	161	112	56	3.67	5.35	4.38	2.67	2.26	1.62	4.46667	2.18333	-1.0327	0.00375767	0.040443
ENSSSCG00000006141	757	2900	1606	1254	450	490	21.51	51.57	28.39	20.8	9.08	14.17	33.8233	14.6833	-1.2038	0.00389399	0.041519
ENSSSCG00000017349	89	110	119	67	56	31	2.53	1.96	2.1	1.11	1.13	0.9	2.19667	1.04667	-1.0695	0.00405302	0.0427
ENSSSCG00000035443	16	5	39	48	52	146	0.45	0.09	0.69	0.8	1.05	4.22	0.41	2.02333	2.303	0.00461479	0.046526
ENSSSCG00000046640	1839	628	1953	4211	10025	3150	52.26	11.17	34.53	69.86	202.25	91.12	32.6533	121.077	1.8906	0.00462905	0.046628
ENSSSCG00000039784	100	187	197	25	84	49	2.84	3.33	3.48	0.41	1.69	1.42	3.21667	1.17333	-1.455	0.00473031	0.0474979
ENSSSCG00000007336	329	1019	300	239	167	205	9.35	18.12	5.3	3.96	3.37	5.93	10.9233	4.42	-1.3053	0.00477247	0.047844
ENSSSCG00000032113	195	248	217	66	126	92	5.54	4.41	3.84	1.09	2.54	2.66	4.59667	2.09667	-1.1325	0.00480103	0.0479756
ENSSSCG00000009735	28	35	5	89	111	62	0.8	0.62	0.09	1.48	2.24	1.79	0.503333	1.83667	1.8675	0.00498657	0.0493688
ENSSSCG00000036961	66	38	143	154	237	188	1.88	0.68	2.53	2.55	4.78	5.44	1.69667	4.25667	1.327	0.00509722	0.0500783
ENSSSCG00000017548	481	829	222	1596	845	949	13.67	14.74	3.92	26.48	17.05	27.45	10.7767	23.66	1.1345	0.00513551	0.050307
ENSSSCG00000008647	1780	1057	1815	3617	9930	2796	50.58	18.8	32.09	60	200.33	80.88	33.8233	113.737	1.7496	0.00534294	0.0518891
ENSSSCG00000016486	131	193	123	99	72	49	3.72	3.43	2.17	1.64	1.45	1.42	3.10667	1.50333	-1.0472	0.00550951	0.053092
ENSSSCG00000031750	35	72	91	13	20	23	0.99	1.28	1.61	0.22	0.4	0.67	1.29333	0.43	-1.5887	0.00590535	0.0558671
ENSSSCG00000029886	7223	8828	25328	8533	7348	3924	205.26	156.99	447.75	141.55	148.24	113.51	270	134.433	-1.0061	0.00594735	0.0560937
ENSSSCG00000030095	2318	1890	2670	1945	1109	331	65.87	33.61	47.2	32.27	22.37	9.57	48.8933	21.4033	-1.1918	0.00602773	0.0565942
ENSSSCG00000001411	246	240	192	92	133	92	6.99	4.27	3.39	1.53	2.68	2.66	4.88333	2.29	-1.0925	0.0061146	0.0572015
ENSSSCG00000037579	27	120	127	37	18	23	0.77	2.13	2.25	0.61	0.36	0.67	1.71667	0.546667	-1.6509	0.00612746	0.0572015
ENSSSCG00000039858	26	36	39	139	51	53	0.74	0.64	0.69	2.31	1.03	1.53	0.69	1.62333	1.2343	0.00614096	0.0572015
ENSSSCG00000013765	69	143	144	65	66	20	1.96	2.54	2.55	1.08	1.33	0.58	2.35	0.996667	-1.2375	0.00621854	0.0577316
ENSSSCG00000008648	872	205	1252	2556	9506	1912	24.78	3.65	22.13	42.4	191.78	55.31	16.8533	96.4967	2.5174	0.00624502	0.0579129
ENSSSCG00000008491	51	270	232	94	57	40	1.45	4.8	4.1	1.56	1.15	1.16	3.45	1.29	-1.4192	0.0064049	0.0588757
ENSSSCG00000028237	94	118	123	80	51	37	2.67	2.1	2.17	1.33	1.03	1.07	2.31333	1.14333	-1.0167	0.00651423	0.0595429
ENSSSCG00000034102	1838	4958	1358	1295	760	1163	52.23	88.17	24.01	21.48	15.33	33.64	54.8033	23.4833	-1.2226	0.00667707	0.0603217
ENSSSCG00000013785	44	34	94	102	136	136	1.25	0.6	1.66	1.69	2.74	3.93	1.17	2.78667	1.252	0.00726407	0.063235
ENSSSCG00000034688	3	10	2	39	21	15	0.09	0.18	0.04	0.65	0.42	0.43	0.103333	0.5	2.2746	0.00740792	0.0640566
ENSSSCG00000021712	5241	3502	6150	9804	27103	8176	148.94	62.28	108.72	162.64	546.79	236.51	106.647	315.313	1.5639	0.00745809	0.064222
ENSSSCG00000040822	131	142	176	107	52	59	3.72	2.53	3.11	1.78	1.05	1.71	3.12	1.51333	-1.0438	0.00755907	0.0648047
ENSSSCG00000036626	97	345	98	537	408	218	2.76	6.14	1.73	8.91	8.23	6.31	3.54333	7.81667	1.1414	0.00769829	0.065563
ENSSSCG00000034569	1687	1108	2165	565	946	801	47.94	19.7	38.27	9.37	19.09	23.17	35.3033	17.21	-1.0366	0.00788168	0.0663802
ENSSSCG00000028962	213	348	334	207	78	132	6.05	6.19	5.9	3.43	1.57	3.82	6.04667	2.94	-1.0403	0.00812047	0.0677942
ENSSSCG00000031423	71	239	198	71	73	65	2.02	4.25	3.5	1.18	1.47	1.88	3.25667	1.51	-1.1088	0.00815921	0.0679352
ENSSSCG00000034369	93	297	394	148	103	83	2.64	5.28	6.97	2.46	2.08	2.4	4.96333	2.31333	-1.1013	0.0087592	0.0716824
ENSSSCG00000001131	784	960	1968	270	856	396	22.28	17.07	34.79	4.48	17.27	11.46	24.7133	11.07	-1.1586	0.00880903	0.0719211
ENSSSCG00000039455	107	106	164	71	75	19	3.04	1.89	2.9	1.18	1.51	0.55	2.61	1.08	-1.273	0.00990072	0.0774549
ENSSSCG00000022842	161	134	142	191	486	228	4.58	2.38	2.51	3.17	9.8	6.6	3.15667	6.52333	1.0472	0.0100141	0.0780454
ENSSSCG00000030821	504	255	164	795	1157	472	14.32	4.53	2.9	13.19	23.34	13.65	7.25	16.7267	1.2061	0.0100202	0.0780454
ENSSSCG00000043182	13	10	13	50	38	20	0.37	0.18	0.23	0.83	0.77	0.58	0.26	0.726667	1.4828	0.0100444	0.0781853
ENSSSCG00000024136	150	156	233	89	71	92	4.26	2.77	4.12	1.48	1.43	2.66	3.71667	1.85667	-1.0013	0.0103791	0.0802382
ENSSSCG00000043519	0	4	0	13	25	9	0	0.07	0	0.22	0.5	0.26	0.0233333	0.326667	3.8074	0.0104313	0.080541
ENSSSCG00000016337	102	31	117	167	225	230	2.9	0.55	2.07	2.77	4.54	6.65	1.84	4.65333	1.3386	0.0108833	0.0826491
ENSSSCG00000012076	4632	2891	7866	9640	30360	8406	131.63	51.41	139.06	159.92	612.5	243.16	107.367	338.527	1.6567	0.0113304	0.0847465
ENSSSCG00000031308	31	56	62	14	24	14	0.88	1	1.1	0.23	0.48	0.4	0.993333	0.37	-1.4248	0.0114772	0.0855309
ENSSSCG00000007146	3513	1683	2426	4553	11280	7248	99.83	29.93	42.89	75.53	227.57	209.66	57.55	170.92	1.5704	0.0115012	0.0855309
ENSSSCG00000025096	318	525	405	118	299	163	9.04	9.34	7.16	1.96	6.03	4.72	8.51333	4.23667	-1.0068	0.0119342	0.0871132
ENSSSCG00000040548	128	344	464	827	931	181	3.64	6.12	8.2	13.72	18.78	5.24	5.98667	12.58	1.0713	0.0121407	0.0881545
ENSSSCG00000002830	1	2	0	13	6	14	0.03	0.04	0	0.22	0.12	0.4	0.0233333	0.246667	3.4021	0.0122088	0.0883757
ENSSSCG00000006912	786	566	634	113	515	171	22.34	10.07	11.21	1.87	10.39	4.95	14.54	5.73667	-1.3417	0.0126888	0.0901096
ENSSSCG00000037557	652	251	438	309	129	160	18.53	4.46	7.74	5.13	2.6	4.63	10.2433	4.12	-1.314	0.0127613	0.0901338
ENSSSCG00000004290	828	261	1158	186	443	232	23.53	4.64	20.47	3.09	8.94	6.71	16.2133	6.24667	-1.376	0.0128437	0.0904374
ENSSSCG00000037878	15	76	52	17	15	8	0.43	1.35	0.92	0.28	0.3	0.23	0.9	0.27	-1.737	0.0129912	0.0909821
ENSSSCG00000025243	244	188	488	191	185	76	6.93	3.34	8.63	3.17	3.73	2.2	6.3	3.03333	-1.0544	0.0132134	0.0920203
ENSSSCG00000022209	62	95	63	32	43	21	1.76	1.69	1.11	0.53	0.87	0.61	1.52	0.67	-1.1818	0.0132411	0.092058
ENSSSCG00000017758	42	39	62	46	149	140	1.19	0.69	1.1	0.76	3.01	4.05	0.993333	2.60667	1.3919	0.014767	0.0991191
ENSSSCG00000022258	66	208	156	25	79	44	1.88	3.7	2.76	0.41	1.59	1.27	2.78	1.09	-1.3508	0.0148293	0.0993346
ENSSSCG00000040770	112	34	3	4	3	12	3.18	0.6	0.05	0.07	0.06	0.35	1.27667	0.16	-2.9962	0.0148393	0.0993346
ENSSSCG00000050689	85	49	37	6	22	17	2.42	0.87	0.65	0.1	0.44	0.49	1.31333	0.343333	-1.9356	0.0151584	0.100659
ENSSSCG00000050590	30	10	16	3	3	4	0.85	0.18	0.28	0.05	0.06	0.12	0.436667	0.0766667	-2.5099	0.0165828	0.106588
ENSSSCG00000012347	111	222	261	74	151	38	3.15	3.95	4.61	1.23	3.05	1.1	3.90333	1.79333	-1.1221	0.0167088	0.107035
ENSSSCG00000026386	306	280	216	126	204	84	8.7	4.98	3.82	2.09	4.12	2.43	5.83333	2.88	-1.0183	0.016947	0.108091
ENSSSCG00000032777	7121	2684	5663	10925	18997	11768	202.36	47.73	100.11	181.23	383.25	340.41	116.733	301.63	1.3696	0.0176604	0.11127
ENSSSCG00000031173	31	85	144	46	20	24	0.88	1.51	2.55	0.76	0.4	0.69	1.64667	0.616667	-1.417	0.0182986	0.114192
ENSSSCG00000004419	204	194	572	403	554	746	5.8	3.45	10.11	6.69	11.18	21.58	6.45333	13.15	1.0269	0.0184173	0.114645
ENSSSCG00000029879	56	230	91	45	25	51	1.59	4.09	1.61	0.75	0.5	1.48	2.43	0.91	-1.417	0.0193216	0.118154
ENSSSCG00000027935	91	119	68	62	48	21	2.59	2.12	1.2	1.03	0.97	0.61	1.97	0.87	-1.1791	0.020428	0.121503
ENSSSCG00000006808	171	111	224	56	116	59	4.86	1.97	3.96	0.93	2.34	1.71	3.59667	1.66	-1.1155	0.0229228	0.13026
ENSSSCG00000037775	106709	85163	251742	332688	225823	458446	3032.46	1514.46	4450.3	5518.94	4555.86	13261.5	2999.07	7778.76	1.375	0.0236327	0.132949
ENSSSCG00000038929	1891	760	1647	1014	985	278	53.74	13.52	29.12	16.82	19.87	8.04	32.1267	14.91	-1.1075	0.0241871	0.134535
ENSSSCG00000000298	70	282	52	63	32	39	1.99	5.01	0.92	1.05	0.65	1.13	2.64	0.943333	-1.4847	0.024464	0.135628
ENSSSCG00000007082	356	2012	821	720	521	164	10.12	35.78	14.51	11.94	10.51	4.74	20.1367	9.06333	-1.1517	0.0245567	0.135975
ENSSSCG00000040986	801	462	1603	2161	1587	3306	22.76	8.22	28.34	35.85	32.02	95.63	19.7733	54.5	1.4627	0.0246853	0.136444
ENSSSCG00000041954	518	287	312	205	116	200	14.72	5.1	5.52	3.4	2.34	5.79	8.44667	3.84333	-1.136	0.0260489	0.141034
ENSSSCG00000029515	69	125	65	47	17	37	1.96	2.22	1.15	0.78	0.34	1.07	1.77667	0.73	-1.2832	0.0278902	0.146907
ENSSSCG00000051398	14	12	10	32	63	15	0.4	0.21	0.18	0.53	1.27	0.43	0.263333	0.743333	1.4971	0.0279192	0.146907
ENSSSCG00000017347	154	388	225	201	65	99	4.38	6.9	3.98	3.33	1.31	2.86	5.08667	2.5	-1.0248	0.0281973	0.147339
ENSSSCG00000004803	148	20	13	16	0	13	4.21	0.36	0.23	0.27	0	0.38	1.6	0.216667	-2.8845	0.0284709	0.14827
ENSSSCG00000038670	15	18	11	3	5	1	0.43	0.32	0.19	0.05	0.1	0.03	0.313333	0.06	-2.3847	0.0290171	0.150547
ENSSSCG00000043356	18	42	27	1	7	9	0.51	0.75	0.48	0.02	0.14	0.26	0.58	0.14	-2.0506	0.0292665	0.151589
ENSSSCG00000012409	52	149	81	57	52	19	1.48	2.65	1.43	0.95	1.05	0.55	1.85333	0.85	-1.1246	0.0296313	0.153133
ENSSSCG00000017801	412	1562	436	541	209	306	11.71	27.78	7.71	8.97	4.22	8.85	15.7333	7.34667	-1.0987	0.0303549	0.155541
ENSSSCG00000036224	21564	20713	67869	84705	56410	102147	612.81	368.34	1199.79	1405.17	1138.04	2954.81	726.98	1832.67	1.334	0.0306849	0.15687
ENSSSCG00000036451	38	20	49	0	16	3	1.08	0.36	0.87	0	0.32	0.09	0.77	0.136667	-2.4942	0.0322504	0.16146
ENSSSCG00000018046	64	309	261	62	100	87	1.82	5.49	4.61	1.03	2.02	2.52	3.97333	1.85667	-1.0976	0.0337568	0.165632
ENSSSCG00000000610	13	83	67	30	12	8	0.37	1.48	1.18	0.5	0.24	0.23	1.01	0.323333	-1.6433	0.0338758	0.165838
ENSSSCG00000010997	38	5	3	0	3	2	1.08	0.09	0.05	0	0.06	0.06	0.406667	0.04	-3.3458	0.0339423	0.165855
ENSSSCG00000009469	148	121	320	235	280	503	4.21	2.15	5.66	3.9	5.65	14.55	4.00667	8.03333	1.0036	0.0341755	0.166602
ENSSSCG00000001589	12	16	55	12	6	3	0.34	0.28	0.97	0.2	0.12	0.09	0.53	0.136667	-1.9553	0.0359448	0.172181
ENSSSCG00000033691	18	15	28	3	10	1	0.51	0.27	0.49	0.05	0.2	0.03	0.423333	0.0933333	-2.1813	0.0363883	0.173311
ENSSSCG00000023661	14	34	52	16	12	5	0.4	0.6	0.92	0.27	0.24	0.14	0.64	0.216667	-1.5626	0.0368572	0.174608
ENSSSCG00000016751	327	205	131	162	94	82	9.29	3.65	2.32	2.69	1.9	2.37	5.08667	2.32	-1.1326	0.0370819	0.175072
ENSSSCG00000040393	44	86	152	64	33	30	1.25	1.53	2.69	1.06	0.67	0.87	1.82333	0.866667	-1.073	0.0374966	0.176294
ENSSSCG00000030626	170	620	169	246	103	83	4.83	11.03	2.99	4.08	2.08	2.4	6.28333	2.85333	-1.1389	0.037628	0.176768
ENSSSCG00000033041	208	159	210	58	148	76	5.91	2.83	3.71	0.96	2.99	2.2	4.15	2.05	-1.0175	0.0377825	0.176968
ENSSSCG00000038622	37	17	12	112	37	50	1.05	0.3	0.21	1.86	0.75	1.45	0.52	1.35333	1.3799	0.037874	0.177154
ENSSSCG00000000475	654	1348	4470	682	824	600	18.59	23.97	79.02	11.31	16.62	17.36	40.5267	15.0967	-1.4246	0.0391219	0.181329
ENSSSCG00000009881	4310	2743	5799	5600	22647	6089	122.48	48.78	102.51	92.9	456.89	176.14	91.2567	241.977	1.4069	0.0414716	0.18774
ENSSSCG00000043115	165	41	222	16	100	4	4.69	0.73	3.92	0.27	2.02	0.12	3.11333	0.803333	-1.9544	0.0418266	0.188523
ENSSSCG00000031053	133	587	175	198	122	91	3.78	10.44	3.09	3.28	2.46	2.63	5.77	2.79	-1.0483	0.0422741	0.189989
ENSSSCG00000009720	2010	979	2540	3125	8197	2375	57.12	17.41	44.9	51.84	165.37	68.7	39.81	95.3033	1.2594	0.043699	0.194355
ENSSSCG00000017037	111	194	35	61	56	24	3.15	3.45	0.62	1.01	1.13	0.69	2.40667	0.943333	-1.3512	0.0447266	0.196866
ENSSSCG00000034355	34	89	26	24	17	15	0.97	1.58	0.46	0.4	0.34	0.43	1.00333	0.39	-1.3633	0.0448979	0.197323
ENSSSCG00000035928	46	64	180	156	91	283	1.31	1.14	3.18	2.59	1.84	8.19	1.87667	4.20667	1.1645	0.0464344	0.201545
ENSSSCG00000033089	8938	5131	12064	10801	19187	21147	254	91.25	213.27	179.18	387.09	611.72	186.173	392.663	1.0766	0.0468537	0.203082
ENSSSCG00000027022	74	60	46	39	5	20	2.1	1.07	0.81	0.65	0.1	0.58	1.32667	0.443333	-1.5813	0.0475342	0.204739
ENSSSCG00000002536	16	29	13	8	3	5	0.45	0.52	0.23	0.13	0.06	0.14	0.4	0.11	-1.8625	0.0475655	0.204739
ENSSSCG00000014272	51	60	105	20	53	19	1.45	1.07	1.86	0.33	1.07	0.55	1.46	0.65	-1.1675	0.0476058	0.20477
